# Supplementary material for: Iodine-promoted transfer of dihydrogen from ketones to alkenes, triphenylmethyl, and diphenylmethyl derivatives
Source: Royal Society of Chemistry journal article supplement (doi:10.1039/d3cc03409g), 2023-10-31

## Supporting Information

### **Iodine-promoted transfer of dihydrogen from ketones to alkenes, triphenylmethyl and diphenylmethyl derivatives**

Yiping Duan,<sup>b</sup> Wenyi Zhong,<sup>a</sup> Zhaolan Zeng,<sup>b</sup> Jiajie Feng,<sup>b</sup> Jinyi Xu<sup>b\*</sup>, Fulai Yang<sup>a\*</sup>, Jie Liu<sup>a\*</sup>

DOI: 10.1002/anie.2021XXXXX

## Supporting Information

### Table of Contents

|                                                                                                    |    |
|----------------------------------------------------------------------------------------------------|----|
| 1. General Information.....                                                                        | 3  |
| 2. Preparation of Substrates .....                                                                 | 3  |
| 2.1. Preparation of <b>5b-e</b> , <b>5m-n</b> , <b>5u</b> .....                                    | 3  |
| 2.2. Preparation of <b>1f-l</b> , <b>1o</b> .....                                                  | 4  |
| 2.3. Preparation of <b>1r</b> .....                                                                | 4  |
| 2.4. Preparation of <b>5o</b> , <b>5l</b> , <b>5q</b> .....                                        | 4  |
| 2.5. Preparation of <b>5k</b> , <b>5m</b> .....                                                    | 4  |
| 2.6. Preparation of <b>5b-e</b> , <b>5i</b> .....                                                  | 5  |
| 3. Optimization of the Reaction Conditions .....                                                   | 5  |
| 4. General Procedure of Hydrogenation .....                                                        | 6  |
| 4.1. General Procedure for the Hydrogenation of Alkenes and Alkyne.....                            | 6  |
| 4.2. General Procedure for Hydrogenation of of Alcohol, Ether, Ester, Amine and <i>et al.</i> .... | 6  |
| 5. Mechanism Studies .....                                                                         | 7  |
| 5.1. Compound <b>8</b> NMR and MS Characterization .....                                           | 7  |
| 5.2. General Procedure for Compound <b>9</b> Derivatives Synthesis .....                           | 8  |
| 5.3. General Procedure for Compound <b>9-1</b> Derivatives Synthesis.....                          | 10 |
| 5.4. General Procedure for Deuterium-Labeling Ketones <b>2k</b> Synthesis .....                    | 11 |
| 6. Product Characterization.....                                                                   | 11 |
| 7. References.....                                                                                 | 17 |
| 8. Product NMR Spectra .....                                                                       | 18 |

## 1. General Information

All reaction reagents or intermediates were carried out in dried glassware under atmosphere using 20 mL of Schlenk tube. *n*-Hexane was purchase from shanghai titan scientific. Otherwise noted, other commercially available reagents were purchased from Energy Chemical, Sigma-Aldrich or Bidepharm in the highest purity grade and used without further purification. Thin layer chromatography (TLC) was performed on Energy Chemical silica gel GF-254 plates and visualized by fluorescence quenching under UV light (254/366 nm) or iodine quenching under silica gel and iodine mixture. Column chromatography was performed on Qingdao Ocean Chemical Co., Ltd. silica gel (300-400 mesh). <sup>1</sup>H and <sup>13</sup>C NMR spectra were recorded on a Bruker AC-400 FT or Bruker AC-300 FT spectrometer using tetramethylsilane as an internal reference. NMR multiplicities are abbreviated as follows: s = singlet, d = doublet, m = multiplet. Chemical shifts ( $\delta$ ) and coupling constants (*J*) were expressed in ppm and Hz, respectively. High-resolution mass spectra (HRMS) measurement was performed on Agilent Q-TOF 6520 mass spectrometer with electron ionization (EI) and electrospray ion source (ESI) as the ion source.

**Abbreviations:** TH = transfer hydrogenation, NIS = *N*-iodosuccinimide, TBAI = tetrabutylammonium iodide, TfOH = trifluoromethanesulfonic acid, DCM = dichloromethane, EA = ethyl acetate, THF = tetrahydrofuran, MeCN = acetonitril, DIDMH= 1,3-diiodo-5,5-dimethylimidazolidine-2,4-dione.

## 2. Preparation of Substrates

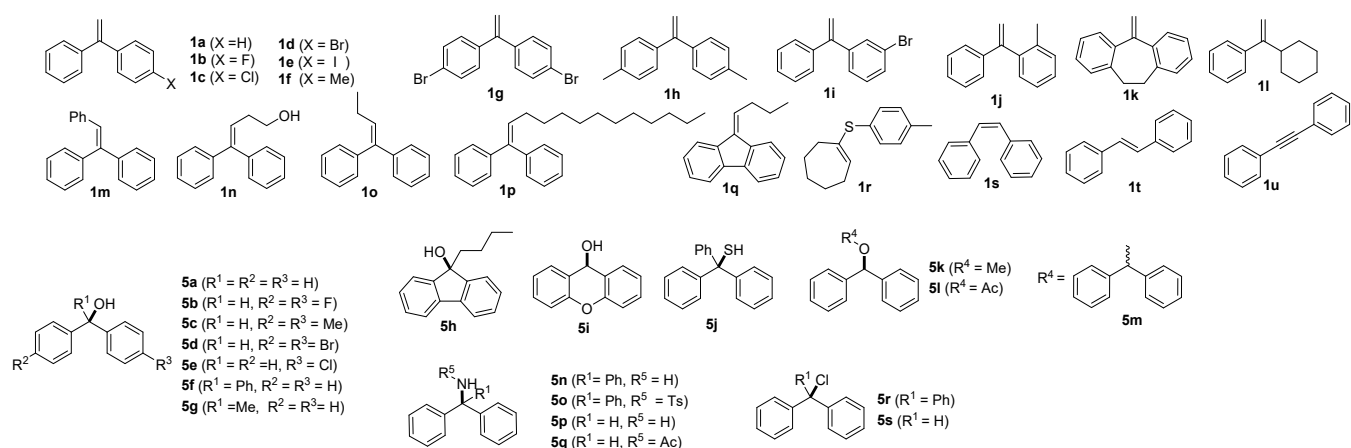

Figure S1. Substrate structures.

### 2.1. Preparation of 5b-e, 5m-n, 5u

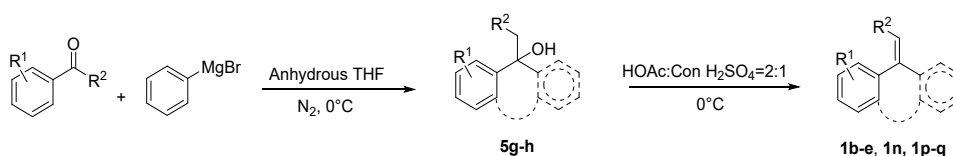

To a solution of substituent aromatic ketones (10.0 mmol) in dry tetrahydrofuran (20 mL) under a nitrogen atmosphere at 0 °C was added dropwise a solution of phenyl magnesium bromide in tetrahydrofuran (2.0 M, 7.5 mL, 15.0 mmol). The mixture was stirred at 0 °C for 10 min and then for another 2 h at room temperature. The mixture was added a saturated aqueous NH<sub>4</sub>Cl solution (10 mL) carefully, then extracted with ethyl acetate (3 × 20 mL). The organic layer was washed with brine, dried over anhydrous sodium sulfate, filtered, and concentrated to give the crudes, which were purified by silica gel column chromatography, eluting with petroleum ether, to give desired products **5g-h**.

The crude product was dissolved in acetic acid (4 mL) at 0 °C, and Con. H<sub>2</sub>SO<sub>4</sub> (2.0 mL) was added dropwise. The mixture was allowed to warm to room temperature and stirred for 20 min. The reaction mixture was poured out into about 50 mL ice water, and then extracted with ethyl acetate (3 × 15 mL). The organic layer was washed with brine, dried over anhydrous sodium sulfate, filtered,

and concentrated to give the crudes, which were purified by silica gel column chromatography, eluting with petroleum ether, to give desired products **1b-e**, **1n**, **1p-q**.

## 2.2. Preparation of **1f-l**, **1o**

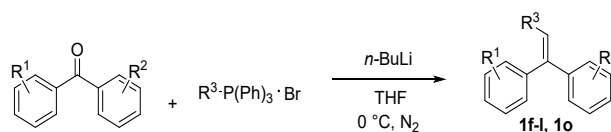

To a solution of  $R^3(\text{Ph})_3\text{Br}$  (5.13 g, 15.0 mmol) in dry tetrahydrofuran (20 mL) under a nitrogen atmosphere at 0 °C was added dropwise a solution of *n*-BuLi in tetrahydrofuran (2.5 M, 6.0 mL, 15.0 mmol). The mixture was allowed to warm to room temperature and stirred for 0.5 h. Ketones (12.0 mmol) were dissolved in anhydrous and added into the above reaction mixture with a syringe, the results mixture was stirred with another 2 h. After the reaction was completed, the mixture was added a saturated aqueous  $\text{NH}_4\text{Cl}$  solution (10 mL) carefully, then extracted with ethyl acetate ( $3 \times 20$  mL). The organic layer was washed with brine, dried over anhydrous sodium sulfate, filtered, and concentrated to give the crudes, which were purified by silica gel column chromatography, eluting with petroleum ether, to give desired products **1f-l**, **1o**.

## 2.3. Preparation of **1r**

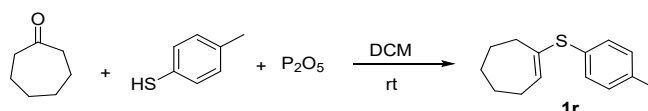

Cycloheptanone (1.12 g, 10.0 mmol) and  $\text{P}_2\text{O}_5$  (2.84 g, 20.0 mmol) were dissolved in 30 mL anhydrous DCM (30 mL), and *p*-toluenethiol (1.37 g, 11.0 mmol) was added dropwise. Then, the mixture was stirred for 5 h at room temperature. The mixture was quenched with 2N NaOH (30 mL) solution, then extracted with ethyl acetate ( $3 \times 20$  mL). The organic layer was washed with brine, dried over anhydrous sodium sulfate, filtered, and concentrated to give the crude, which was purified by silica gel column chromatography, eluting with petroleum ether, to give the desired product **1r**.

## 2.4. Preparation of **5o**, **5l**, **5q**

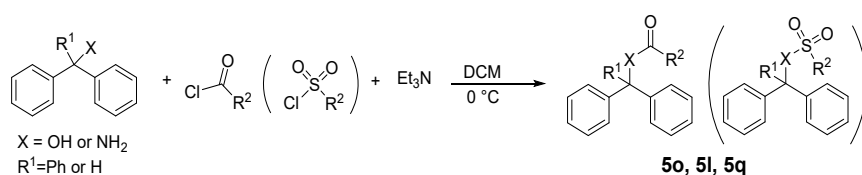

Substituents benzyl alcohol (10.0 mmol) and  $\text{Et}_3\text{N}$  (2.77 mL, 20.0 mmol) were dissolved in anhydrous dichloromethane (30 mL) at 0 °C and acyl chloride/ sulfonyl chloride (15.0 mmol) was added dropwise. The mixture was allowed to warm to room temperature and stirred for 3 h. Then, the mixture was extracted with dichloromethane ( $3 \times 20$  mL). The organic layer was washed with brine, dried over anhydrous sodium sulfate, filtered, and concentrated to give the crude, which was purified by silica gel column chromatography, eluting with ethyl acetate/petroleum ether (1: 5 to 1: 3 v/v), to give desired products **5o**, **5l**, **5q**.

## 2.5. Preparation of **5k**, **5m**

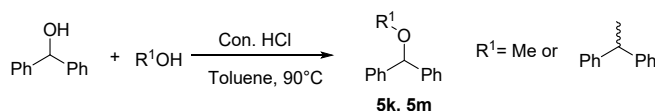

To a solution of benzhydrol (1.84 g, 10.0 mmol) in toluene (20 mL) was added methanol/ethanol (30.0 mmol) and 3 drops Con. HCl. The mixture was heated at 100 °C for 12 h, cooled to room temperature, and concentrated under reduced pressure to give the crudes, which as purified by silica gel column chromatography, eluting with ethyl acetate/petroleum ether (1: 20 to 1: 10 v/v), to give desired products **5k**, **5m**.

## 2.6. Preparation of **5b-e**, **5i**

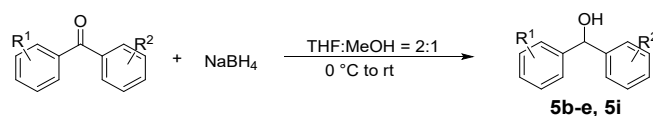

Ketones (10.0 mmol) were dissolved in MeOH (30 mL) at 0 °C, and NaBH<sub>4</sub> (757 mg, 20.0 mmol) was added slowly. The mixture was allowed to warm to room temperature and stirred for 2 h. The mixture was quenched with 10 mL saturated aqueous NH<sub>4</sub>Cl solution, then extracted with ethyl acetate (3 × 20 mL). The organic layer was washed with brine, dried over anhydrous sodium sulfate, filtered, and concentrated to give the crude, which was purified by silica gel column chromatography, eluting with ethyl acetate/petroleum ether (1: 10 to 1: 4 v/v), to give desired product **5b-e**, **5i**.

## 3. Optimization of the Reaction Conditions

The template reaction of iodine-promoted transfer of dihydrogen from ketones to alkenes were performed. (Scheme S1, eq 1) Various of ketones (**2a-j**) were tested for the hydrogenation reaction under the template reaction conditions. (Scheme S1, eq 2)

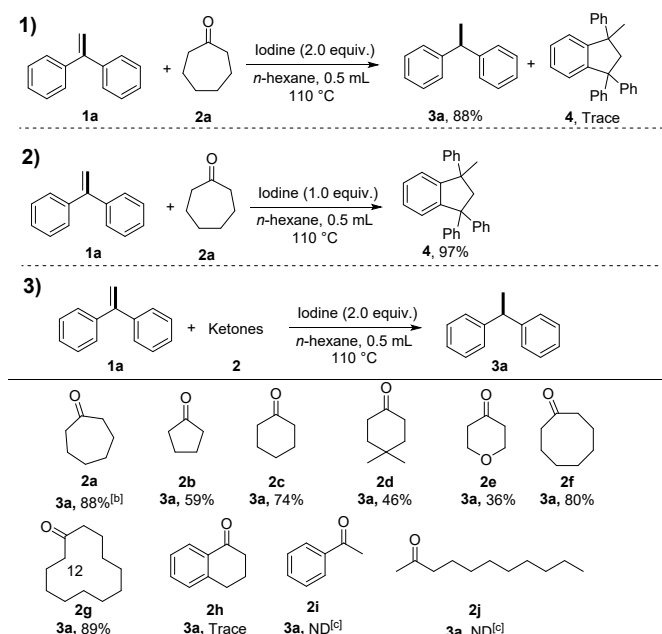

[a] Reaction conditions: **1a** (0.3 mmol), ketones (0.75 mmol), iodine (0.6 mmol) and *n*-hexane (0.5 mL) under the atmosphere for 4 h at 110 °C. [b] The yields are isolated yield. [c] ND = not detected.

**Scheme S1. The effect of ketones on hydrogenation reactions.**

For the procedure, see below. The results are summarized in the following Table.

**Table S1. optimization of the reaction condition**<sup>[a]</sup>

| Entry <sup>[a]</sup> | Change from standard conditions | Yield of <b>3a</b> [%] <sup>[b]</sup> |
|----------------------|---------------------------------|---------------------------------------|
| 1                    | None                            | 88                                    |
| 2                    | DCM instead of <i>n</i> -hexane | 23                                    |

|    |                                               |                        |
|----|-----------------------------------------------|------------------------|
| 3  | Toluene instead of <i>n</i> -hexane           | 80                     |
| 4  | CHCl <sub>3</sub> instead of <i>n</i> -hexane | 18                     |
| 5  | MeCN instead of <i>n</i> -hexane              | 65                     |
| 6  | Lower the temperature to 90 °C                | 77                     |
| 7  | DIDMH instead of iodine                       | 26                     |
| 8  | NIS instead of iodine                         | 29                     |
| 9  | HI instead of iodine                          | 37                     |
| 10 | TBAI instead of iodine                        | NR                     |
| 11 | TfOH instead of iodine                        | 62(48 <sup>[c]</sup> ) |

[a] Reaction conditions: **1a** (0.3 mmol), **2a** (0.75 mmol), and Lewis acid (0.6 mmol) in *n*-hexane (0.5 mL), at 110 °C (oil bath), for 4 h. [b] Isolate yield. [c] 0.15 mmol TfOH, the isolated yield is 48%.

**Table S2.** Optimization of the reaction conditions.

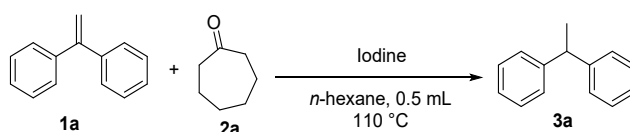

| Entry | cycloheptanone (equiv) | Iodine (equiv) | Solvent (0.5 mL)  | T [°C] | t [h] | Yield [%] |
|-------|------------------------|----------------|-------------------|--------|-------|-----------|
| 1     | 1                      | 2              | <i>n</i> -hexane  | 110    | 8     | 28        |
| 2     | 1.5                    | 2              | <i>n</i> -hexane  | 110    | 8     | 37        |
| 3     | 2                      | 2              | <i>n</i> -hexane  | 110    | 8     | 68        |
| 4     | 2.5                    | 2              | <i>n</i> -hexane  | 110    | 8     | 88        |
| 5     | 3                      | 2              | <i>n</i> -hexane  | 110    | 8     | 84        |
| 6     | 2.5                    | 0.5            | <i>n</i> -hexane  | 110    | 8     | Trace     |
| 7     | 2.5                    | 1              | <i>n</i> -hexane  | 110    | 8     | trace     |
| 8     | 2.5                    | 1.5            | <i>n</i> -hexane  | 110    | 8     | 38        |
| 9     | 2.5                    | 3              | <i>n</i> -hexane  | 110    | 8     | 79        |
| 10    | 2.5                    | 2              | DCM               | 110    | 8     | 23        |
| 11    | 2.5                    | 2              | Toluene           | 110    | 8     | 80        |
| 12    | 2.5                    | 3              | EA                | 110    | 8     | NR        |
| 13    | 2.5                    | 2              | Dioxane           | 110    | 8     | NR        |
| 14    | 2.5                    | 2              | THF               | 110    | 8     | NR        |
| 15    | 2.5                    | 2              | CHCl <sub>3</sub> | 110    | 8     | 18        |
| 16    | 2.5                    | 2              | MeCN              | 110    | 8     | 65        |
| 17    | 2.5                    | 2              | <i>n</i> -hexane  | 90     | 8     | 77        |
| 18    | 2.5                    | 2              | <i>n</i> -hexane  | 70     | 8     | trace     |
| 19    | 2.5                    | 2              | <i>n</i> -hexane  | 110    | 2     | 56        |
| 20    | 2.5                    | 2              | <i>n</i> -hexane  | 110    | 4     | 89        |

According to the results, the amount of iodine and ketones is critical factors influencing the efficiency of the reaction. The amount of cycloheptanone needs more than 2.0 equiv., otherwise the yield of 1,1-diphenylethane will reduced sharply. The amount of iodine is also very important to the yield. The solvent of this hydrogenation reaction was compatible with *n*-hexane, toluene and MeCN. The temperature of the reaction is also important, while the temperature is under 70 °C, the reaction will not take place.

## 4. General Procedure of Hydrogenation

### 4.1. General Procedure for the Hydrogenation of Alkenes and Alkyne

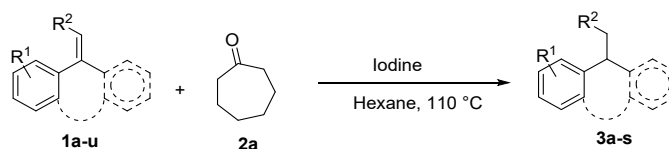

To a solution of alkene derivatives (0.3 mmol) in *n*-hexane (0.5 mL) was added cycloheptanone (88.5  $\mu$ L, 0.75 mmol) and iodine (152.3 mg, 0.6 mmol). The mixture was heated at 110  $^{\circ}$ C (oil bath) under air in a sealed tube for 4 h, cooled to room temperature, and purified by silica gel column chromatography, eluting with ethyl acetate/petroleum ether (0: 10 to 1: 10 v/v), to give the desired products.

#### 4.2. General Procedure for Hydrogenation of alcohol, ether, ester, amine *et al.*

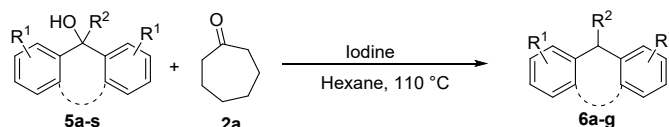

To a solution of benzhydryl derivatives (0.3 mmol) in *n*-hexane (0.5 mL) was added cycloheptanone (88.5  $\mu$ L, 0.75 mmol) and iodine (152.3 mg, 0.6 mmol). The mixture was heated at 110  $^{\circ}$ C (oil bath) under air in a sealed tube for 4 h, cooled to room temperature, and purified by silica gel column chromatography, eluting with ethyl acetate/petroleum ether (0: 10 to 1: 10 v/v), to give the desired products.

## 5. Mechanism Studies

### 5.1. Compound 8 NMR and MS Characterization

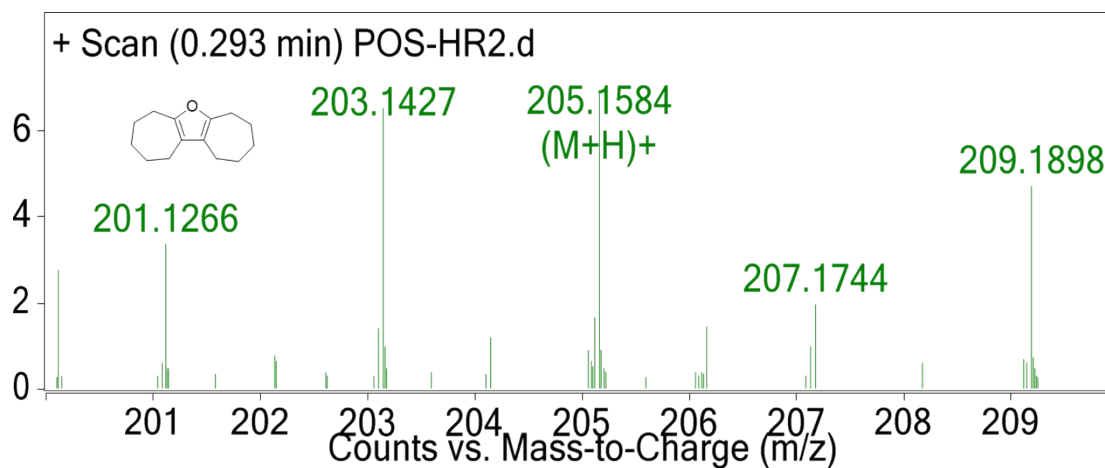

Compound 8 HRMS (ESI) calcd for  $C_{14}H_{21}O$  ( $M+H^+$ ) 205.1587, found 205.1584.

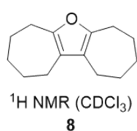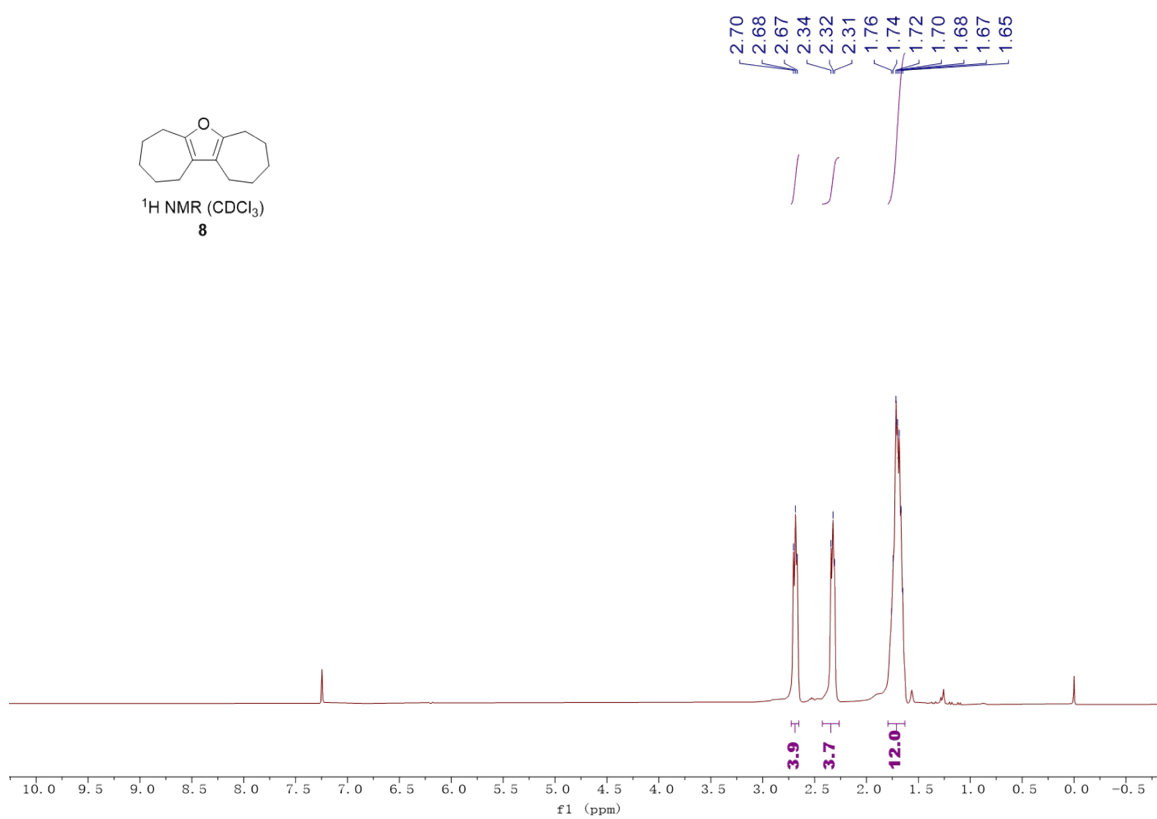

<sup>1</sup>H NMR (300 MHz, CDCl<sub>3</sub>) δ 2.73 – 2.65 (m, 4H), 2.43 – 2.26 (m, 4H), 1.79 – 1.63 (m, 12H).

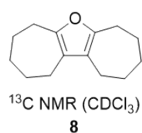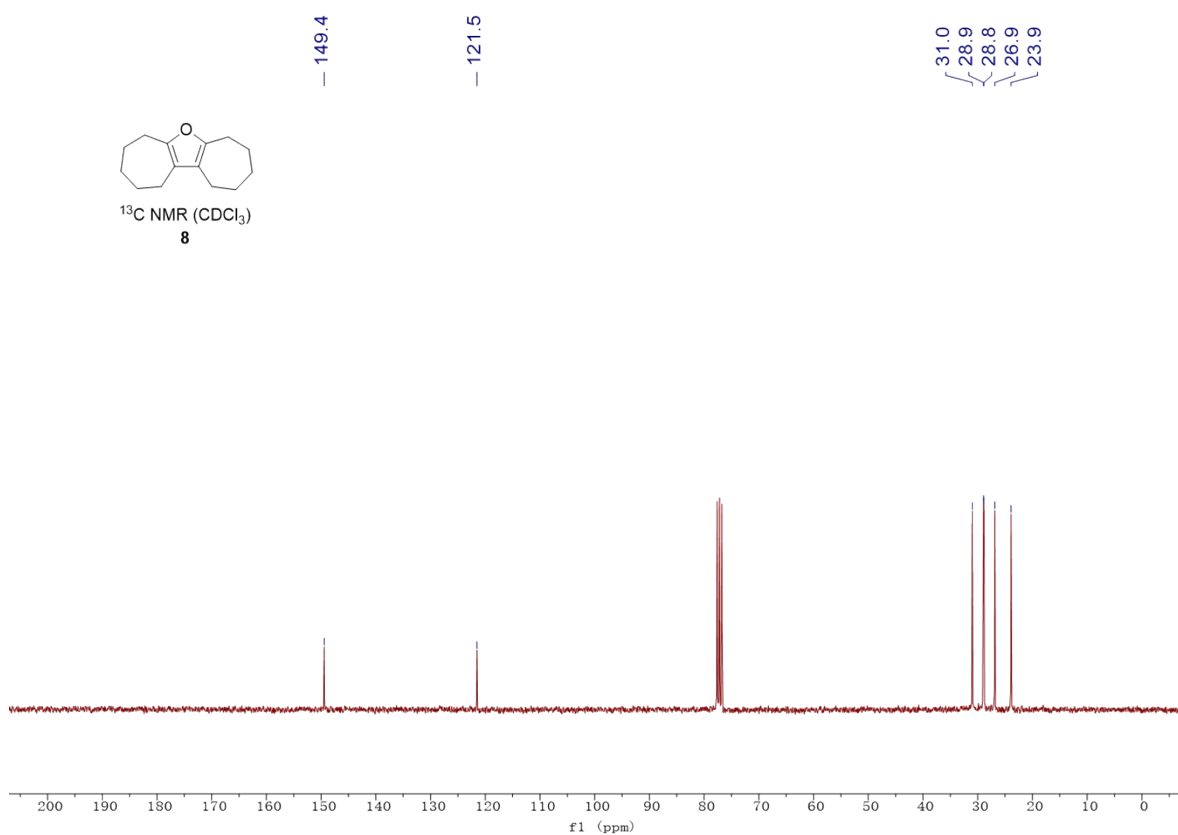

<sup>13</sup>C NMR (75 MHz, CDCl<sub>3</sub>) δ 149.42, 121.51, 30.99, 28.93, 28.84, 26.88, 23.90.



## 5.2. General Procedure for Compound **9** Derivatives Synthesis and Reaction of $\beta$ -Hydroxyketones

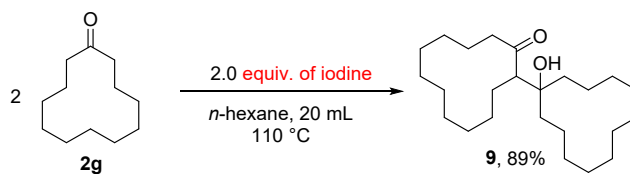

To a solution of cyclododecanone (3.65 g, 20 mmol) in *n*-hexane (20 mL) was added iodine (10.15 g, 40 mmol). The mixture was heated at 90 °C (oil bath) for 2 h, cooled to room temperature, and concentrated under reduced pressure to give the crudes, which was purified by silica gel column chromatography, eluting with ethyl acetate/petroleum ether (1: 10), to give desired product **9**.

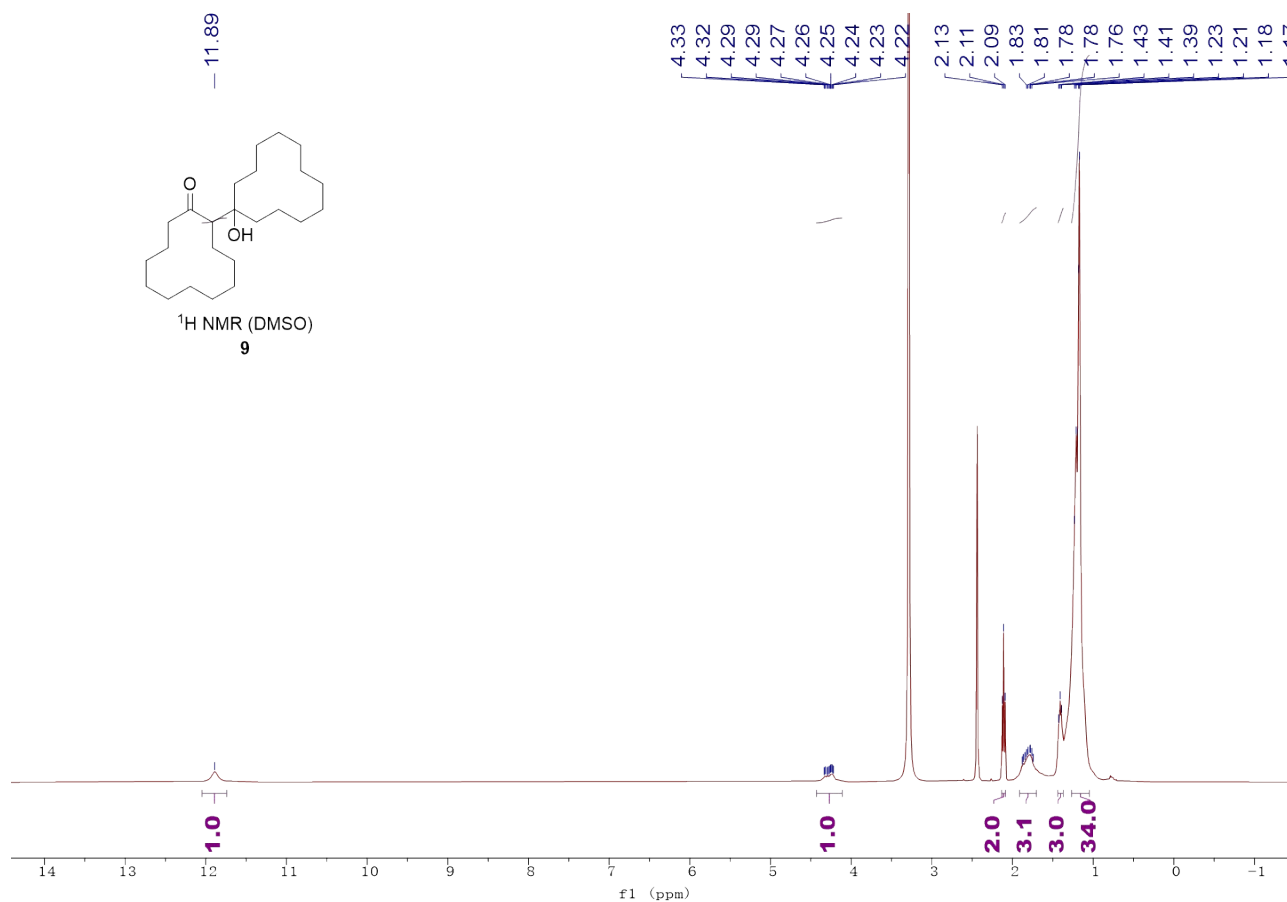

<sup>1</sup>H NMR (400 MHz, DMSO)  $\delta$  11.89 (s, 1H), 4.43 – 4.11 (m, 1H), 2.11 (t,  $J = 7.3$  Hz, 2H), 1.91 – 1.70 (m, 3H), 1.44 – 1.37 (m, 3H), 1.27 – 1.05 (m, 34H).

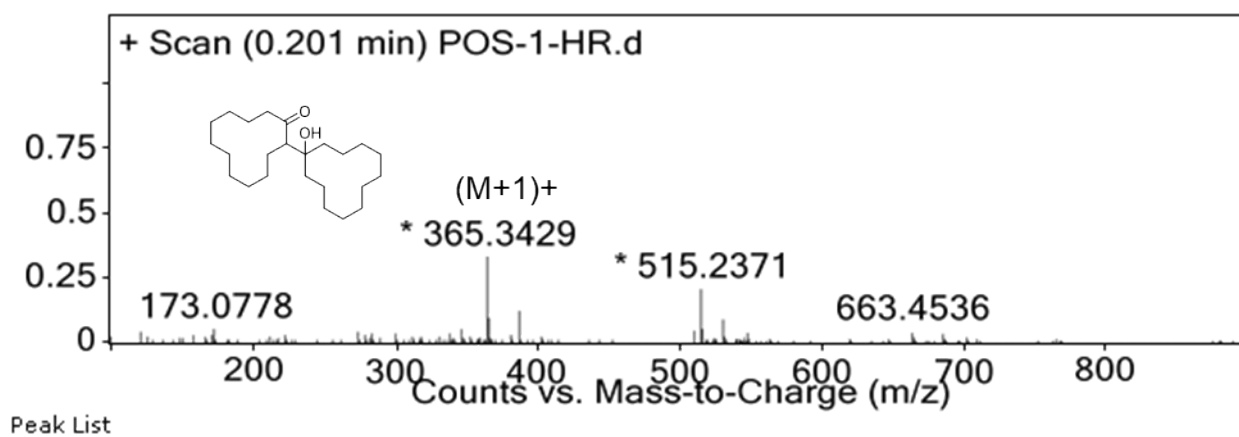

Compound **9** HRMS (ESI) calcd for C<sub>24</sub>H<sub>45</sub>O<sub>2</sub> (M+H<sup>+</sup>) 365.3431, found 365.3429.

### 5.3. General Procedure for Compound **9-1** Derivatives Synthesis

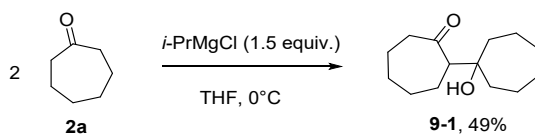

To a solution of cycloheptanone (1.12 g, 10 mmol) in THF, and the mixture was stirred at 0 °C for 10 min. Then, *i*-PrMgCl (7.5 mL, 2.0 M in THF) was added, the mixture was stirred another 4h at 0 °C. After the reaction was completed, quenched with water and extracted with EA, the organic extracts were dried over Na<sub>2</sub>SO<sub>4</sub>. The crude product was purified by silica gel chromatography using a mixture of ethyl acetate and petroleum ether as eluent to get the desired products **9-1**.

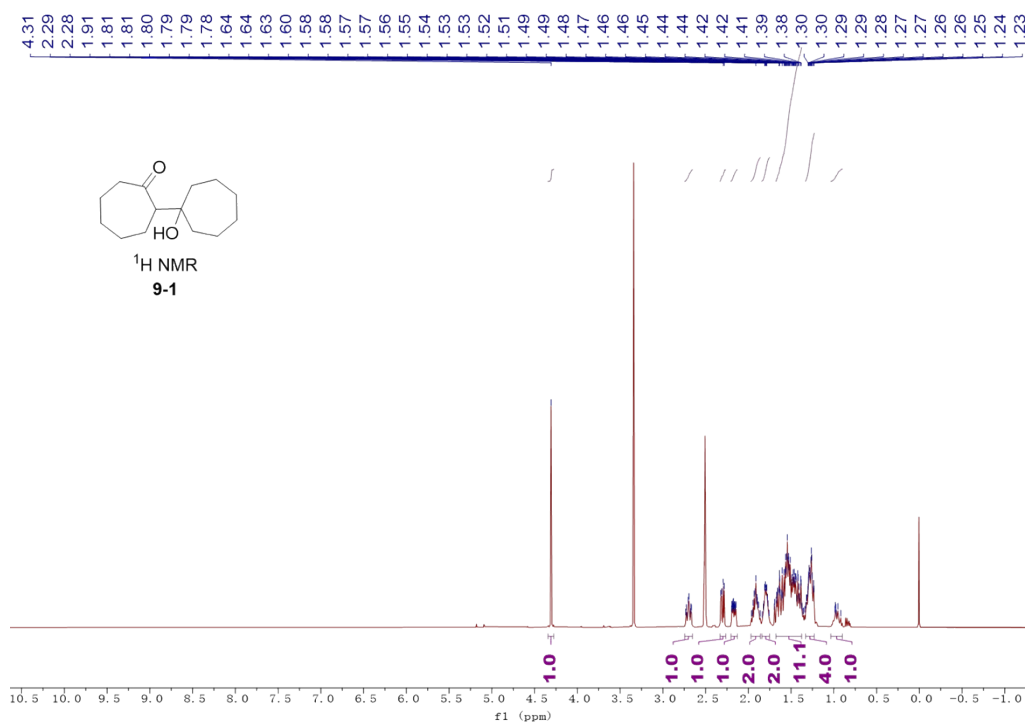

<sup>1</sup>H NMR (400 MHz, DMSO)  $\delta$  4.31 (s, 1H), 2.70 (td,  $J$  = 12.0, 2.9 Hz, 1H), 2.30 (dd,  $J$  = 11.7, 4.6 Hz, 1H), 2.20 - 2.13 (m, 1H), 1.97 - 1.86 (m, 2H), 1.84 - 1.75 (m, 2H), 1.68 - 1.38 (m, 11H), 1.33 - 1.23 (m, 4H), 1.04 - 0.90 (m, 1H).

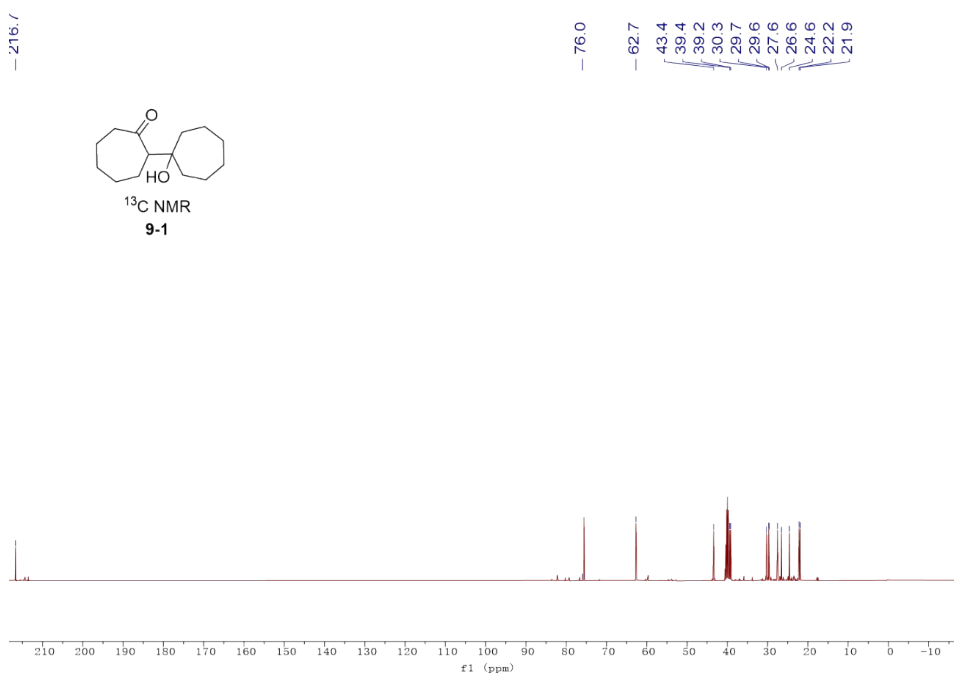

<sup>13</sup>C NMR (101 MHz, DMSO)  $\delta$  216.7, 75.9, 62.7, 43.4, 39.4, 39.2, 30.3, 29.7, 29.6, 27.6, 26.6, 24.6, 22.2, 21.9.

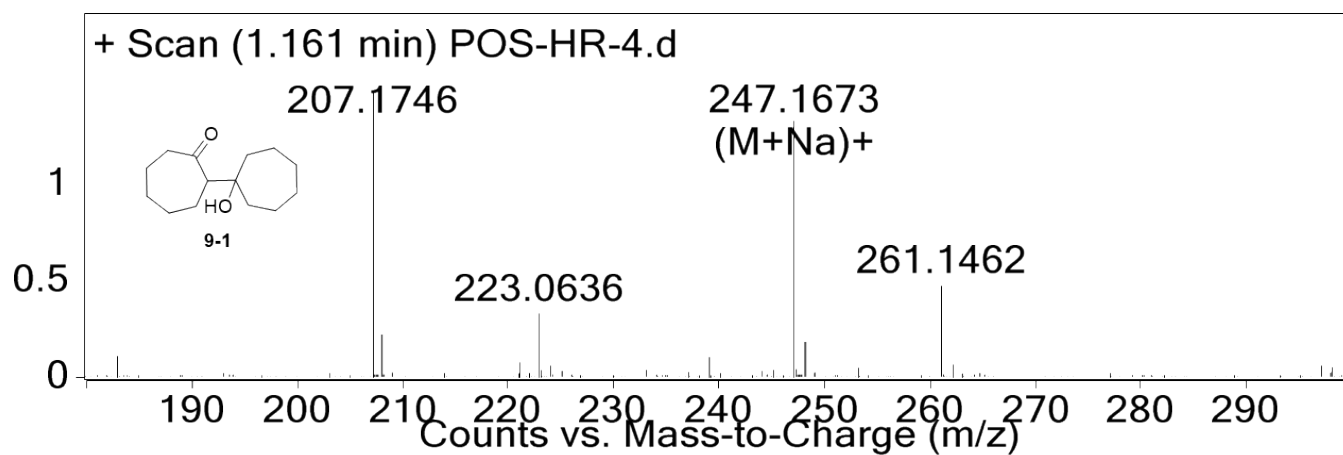

Compound **9-1** HRMS (ESI) calcd for  $C_{14}H_{20}O_2$  (M+Na<sup>+</sup>) 247.1669, found 247.1673.

#### 5.4. General Procedure for Deuterium-Labeling Ketones **2k** Synthesis

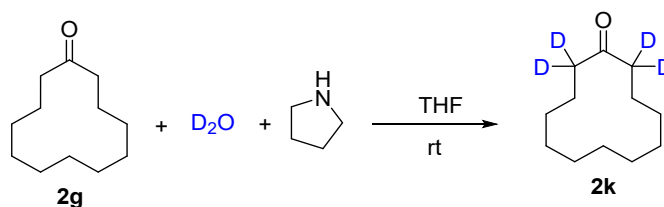

To a round bottom flask, cyclododecone (**2g**) (20 mmol, 3.65g) was dissolved in 10 mL anhydrous THF,  $D_2O$  (8.01g, 400 mmol) and tetrahydropyrrole (142.2 mg, 2.0 mmol) was added. The reaction mixture was stirred at room temperature for 48 h. After the reaction was completed, the mixture was acidic with 2 N HCl and extracted with DCM, the organic extracts were dried over  $Na_2SO_4$ . The crude product was purified by silica gel chromatography using a mixture of ethyl acetate and petroleum ether as eluent to get the desired products.

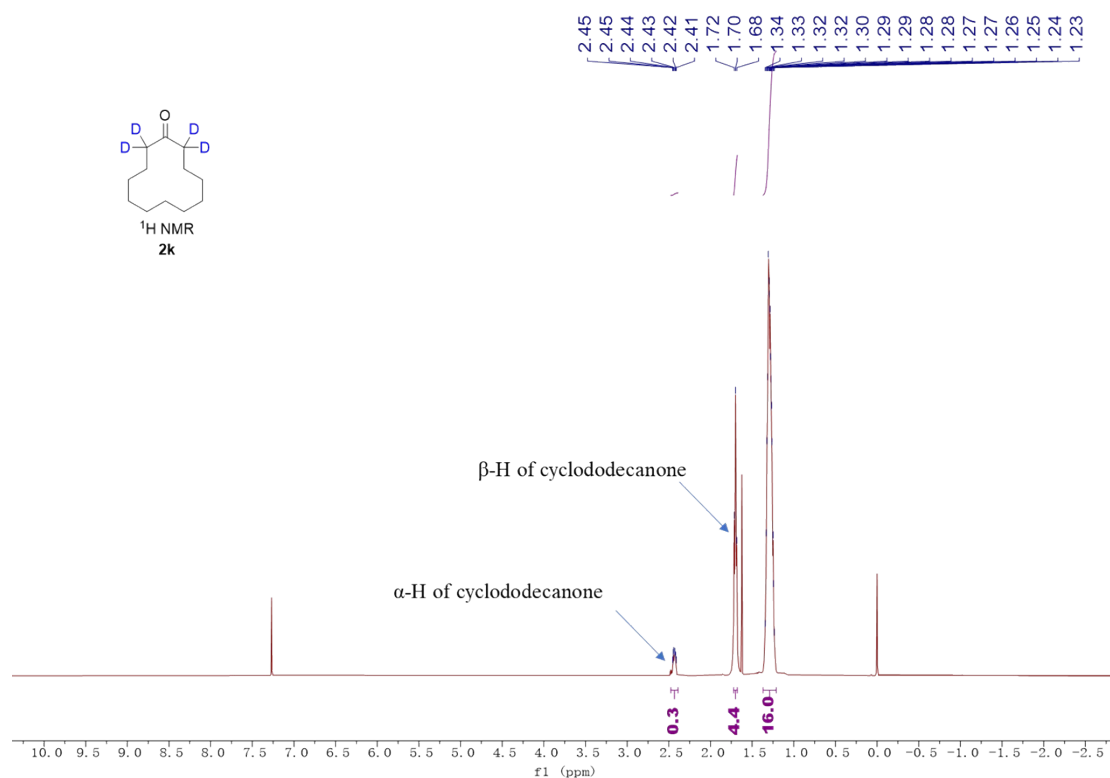

<sup>1</sup>H NMR (400 MHz, CDCl<sub>3</sub>)  $\delta$  2.48 – 2.39 (m, 0H), 1.70 (t,  $J$  = 6.4 Hz, 4H), 1.37 – 1.21 (m, 16H).

## 6. Product Characterization

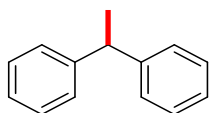

Ethane-1,1-diylidibenzene (**3a**)<sup>1</sup> was obtained as a colorless oil (48.1mg, 88%, from **1a**; 53.0 mg, 97%, from **5g**).

<sup>1</sup>H NMR (300 MHz, CDCl<sub>3</sub>)  $\delta$  7.45 – 7.09 (m, 10H), 4.18 (q,  $J$  = 7.2 Hz, 1H), 1.67 (d,  $J$  = 7.2 Hz, 3H); <sup>13</sup>C NMR (75 MHz, CDCl<sub>3</sub>)  $\delta$  146.4, 128.4, 127.6, 126.1, 44.8, 21.9.

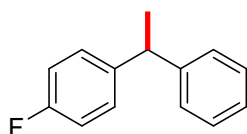

1-Fluoro-4-(1-phenylethyl) benzene (**3b**)<sup>2</sup> was obtained as a colorless oil (54.1 mg, 90% yield).

<sup>1</sup>H NMR (300 MHz, CDCl<sub>3</sub>)  $\delta$  7.43 – 7.35 (m, 2H), 7.30 – 7.24 (m, 5H), 7.06 (t,  $J$  = 8.7 Hz, 2H), 4.23 (q,  $J$  = 7.3 Hz, 1H), 1.71 (d,  $J$  = 7.2 Hz, 3H); <sup>13</sup>C NMR (101 MHz, CDCl<sub>3</sub>)  $\delta$  162.5, 160.12, 146.2, 142.1, 142.1, 129.08, 129.0, 128.5, 127.6, 126.2, 115.2, 115.0, 44.1, 22.1.

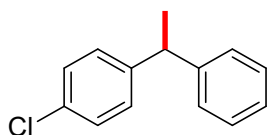

1-Chloro-4-(1-phenylethyl) benzene (**3c**)<sup>2</sup> was obtained as a colorless oil (40.3 mg, 62% yield).

<sup>1</sup>H NMR (400 MHz, CDCl<sub>3</sub>)  $\delta$  7.37 – 7.29 (m, 2H), 7.29 – 7.27 (m, 2H), 7.27 – 7.18 (m, 3H), 7.22 – 7.14 (m, 2H), 4.16 (q,  $J$  = 7.2 Hz, 1H), 1.65 (d,  $J$  = 7.2 Hz, 3H); <sup>13</sup>C NMR (101 MHz, CDCl<sub>3</sub>)  $\delta$  145.9, 144.9, 131.8, 129.1, 128.6, 128.5, 127.6, 126.3, 44.2, 21.9.

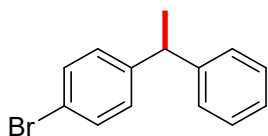

1-Bromo-4-(1-phenylethyl) benzene (**3d**)<sup>3</sup> was obtained as a colorless oil (71.3 mg, 91% yield).

<sup>1</sup>H NMR (300 MHz, CDCl<sub>3</sub>) δ 7.41 – 7.35 (m, 2H), 7.32 – 7.24 (m, 2H), 7.21 – 7.15 (m, 3H), 7.11 – 7.04 (m, 2H), 4.09 (q, *J* = 7.2 Hz, 1H), 1.60 (d, *J* = 7.3 Hz, 3H); <sup>13</sup>C NMR (101 MHz, CDCl<sub>3</sub>) δ 145.8, 145.4, 131.5, 129.5, 128.5, 127.6, 126.3, 119.9, 44.3, 21.8.

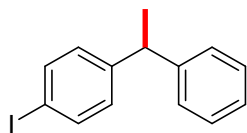

1-Iodo-4-(1-phenylethyl) benzene (**3e**)<sup>4</sup> was obtained as a white solid at room temperature (60.1 mg, 65% yield).

<sup>1</sup>H NMR (400 MHz, CDCl<sub>3</sub>) δ 7.68 – 7.65 (m, 2H), 7.40 – 7.31 (m, 2H), 7.29 – 7.24 (m, 3H), 7.06 – 7.02 (m, 2H), 4.16 (q, *J* = 7.1 Hz, 1H), 1.68 (d, *J* = 7.1 Hz, 3H); <sup>13</sup>C NMR (101 MHz, CDCl<sub>3</sub>) δ 146.2, 145.8, 137.5, 129.9, 128.6, 127.7, 126.4, 91.4, 44.4, 21.8.

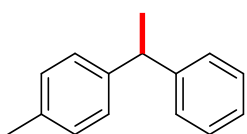

1-Methyl-4-(1-phenylethyl) benzene (**3f**)<sup>2</sup> was obtained as a colorless oil (46.5 mg, 79% yield).

<sup>1</sup>H NMR (400 MHz, CDCl<sub>3</sub>) δ 7.36 – 7.31 (m, 2H), 7.30 – 7.26 (m, 2H), 7.26 – 7.20 (m, 1H), 7.20 – 7.14 (m, 4H), 4.18 (q, *J* = 7.2 Hz, 1H), 2.37 (s, 3H), 1.69 (d, *J* = 7.3 Hz, 3H); <sup>13</sup>C NMR (101 MHz, CDCl<sub>3</sub>) δ 146.7, 143.5, 135.6, 129.1, 128.4, 127.7, 127.6, 126.0, 44.5, 22.0, 21.1.

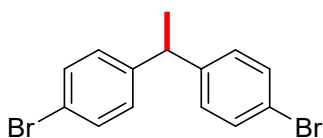

4,4'-(Ethane-1,1-diyl) bis(bromobenzene) (**3g**)<sup>5</sup> was obtained as a white solid at room temperature (65.3 mg, 64% yield).

<sup>1</sup>H NMR (300 MHz, CDCl<sub>3</sub>) δ 7.49 – 7.38 (m, 4H), 7.14 – 7.03 (m, 4H), 4.08 (q, *J* = 7.2 Hz, 1H), 1.61 (d, *J* = 7.2 Hz, 3H); <sup>13</sup>C NMR (101 MHz, CDCl<sub>3</sub>) δ 144.8, 131.6, 129.4, 120.1, 43.7, 21.7.

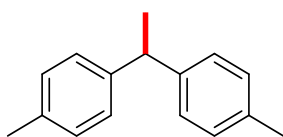

4,4'-(Ethane-1,1-diyl) bis(methylbenzene) (**3h**)<sup>5</sup> was obtained as a colorless oil (34.7 mg, 55% yield).

<sup>1</sup>H NMR (400 MHz, CDCl<sub>3</sub>) δ 7.20 – 7.14 (m, 8H), 4.16 (q, *J* = 7.2 Hz, 1H), 2.38 (s, 6H), 1.68 (d, *J* = 7.2 Hz, 3H); <sup>13</sup>C NMR (101 MHz, CDCl<sub>3</sub>) δ 143.6, 135.3, 128.9, 127.3, 43.8, 21.9, 20.9.

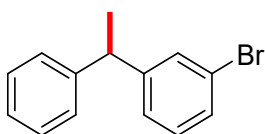

1-Bromo-3-(1-phenylethyl) benzene (**3i**)<sup>6</sup> was obtained as a colorless oil (40.0 mg, 51% yield).

<sup>1</sup>H NMR (300 MHz, CDCl<sub>3</sub>) δ 7.39 (d, *J* = 1.7 Hz, 1H), 7.36 – 7.31 (m, 2H), 7.25 – 7.20 (m, 3H), 7.18 – 7.14 (m, 2H), 4.13 (q, *J* = 7.3 Hz, 1H), 1.64 (d, *J* = 7.3 Hz, 3H); <sup>13</sup>C NMR (101 MHz, CDCl<sub>3</sub>) δ 148.8, 145.5, 130.7, 129., 129.2, 128.6, 127.6, 126.4, 126.4, 122.6, 44.6, 21.7.

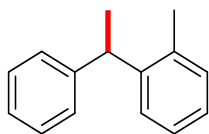

1-Methyl-2-(1-phenylethyl) benzene (**3j**)<sup>2</sup> was obtained as a colorless oil (53.0mg, 90% yield).

<sup>1</sup>H NMR (400 MHz, CDCl<sub>3</sub>) δ 7.30 – 7.16 (m, 4H), 7.19 – 7.09 (m, 5H), 4.31 (q, *J* = 7.2 Hz, 1H), 2.23 (s, 3H), 1.60 (d, *J* = 7.2 Hz, 3H); <sup>13</sup>C NMR (101 MHz, CDCl<sub>3</sub>) δ 146.3, 143.9, 136.2, 130.5, 128.4, 127.8, 126.8, 126.2, 126.1, 125.9, 41.1, 22.2, 19.8.

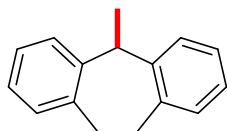

5-Methyl-10,11-dihydro-5H-dibenzo[*a,d*][7]annulene (**3k**)<sup>7</sup> was obtained as a colorless oil (41.8 mg, 67% yield).

<sup>1</sup>H NMR (300 MHz, CDCl<sub>3</sub>) δ 7.26 – 7.17 (m, 2H), 7.18 – 7.04 (m, 6H), 4.42 (q, *J* = 7.4 Hz, 1H), 3.20 (s, 4H), 1.71 (d, *J* = 7.4 Hz, 3H); <sup>13</sup>C NMR (75 MHz, CDCl<sub>3</sub>) δ 143.3, 139.3, 130.1, 127.5, 126.4, 126.2, 77.3, 43.7, 33.3, 22.0.

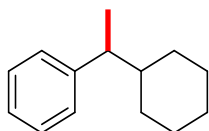

(1-Cyclohexylethyl) benzene (**3l**)<sup>2</sup> was obtained as a colorless oil (24.8 mg, 44% yield).

<sup>1</sup>H NMR (400 MHz, CDCl<sub>3</sub>) δ 7.36 – 7.27 (m, 2H), 7.25 – 7.15 (m, 3H), 2.48 (p, *J* = 7.2 Hz, 1H), 1.99 – 1.87 (m, 1H), 1.83 – 1.73 (m, 1H), 1.72 – 1.60 (m, 2H), 1.50 – 1.40 (m, 2H), 1.36 – 1.22 (m, 1H), 1.27 (d, *J* = 7.1 Hz, 3H), 1.25 – 1.05 (m, 2H), 1.03 – 0.93 (m, 1H), 0.92 – 0.78 (m, 1H); <sup>13</sup>C NMR (75 MHz, CDCl<sub>3</sub>) δ 147.2, 128.0, 127.8, 125.7, 45.9, 44.2, 31.5, 30.7, 26.6, 26.6, 18.9.

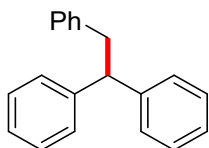

Ethane-1,1,2-triyltribenzene (**3m**)<sup>8</sup> was obtained as a white solid at room temperature (24.8 mg, 32% yield).

<sup>1</sup>H NMR (400 MHz, CDCl<sub>3</sub>) δ 7.30 – 7.28 (m, 3H), 7.27 – 7.21 (m, 6H), 7.21 – 7.12 (m, 4H), 7.07 – 6.99 (m, 2H), 4.27 (t, *J* = 7.8 Hz, 1H), 3.40 (d, *J* = 7.8 Hz, 2H); <sup>13</sup>C NMR (101 MHz, CDCl<sub>3</sub>) δ 144.6, 140.4, 129.2, 128.4, 128.2, 126.5, 126.3, 126.0, 53.2, 42.2.

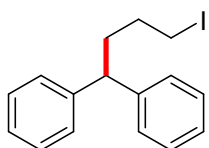

(4-Iodobutane-1,1-diyl) dibenzene (**3n**)<sup>9</sup> was obtained as a colorless oil (64.6 mg, 64% yield).

<sup>1</sup>H NMR (300 MHz, CDCl<sub>3</sub>) δ 7.32 – 7.14 (m, 10H), 3.91 (t, *J* = 7.9 Hz, 1H), 3.18 (t, *J* = 6.8 Hz, 2H), 2.25 – 2.09 (m, 2H), 1.86 – 1.69 (m, 2H); <sup>13</sup>C NMR (101 MHz, CDCl<sub>3</sub>) δ 144.5, 128.6, 127.8, 126.4, 50.5, 36.5, 31.8, 7.0.

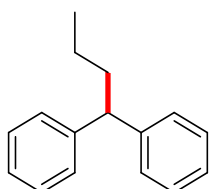

Butane-1,1-diyl dibenzene (**3o**)<sup>10</sup> was obtained as a colorless oil (44.2 mg, 70% yield).

<sup>1</sup>H NMR (300 MHz, CDCl<sub>3</sub>) δ 7.38 – 7.32 (m, 8H), 7.21 – 7.09 (m, 2H), 3.90 (t, *J* = 7.8 Hz, 1H), 2.14 – 1.93 (m, 2H), 1.38 – 1.18 (m, 2H), 0.92 (t, *J* = 7.3 Hz, 3H); <sup>13</sup>C NMR (101 MHz, CDCl<sub>3</sub>) δ 145.4, 128.4, 128.0, 126.1, 51.2, 38.0, 21.2, 14.2.

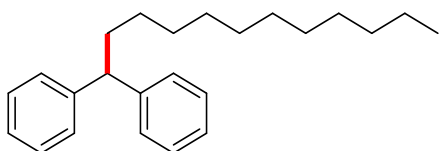

Dodecane-1,1-diyl dibenzene (**3p**)<sup>11</sup> was obtained as a colorless oil (78.4 mg, 81% yield).

<sup>1</sup>H NMR (400 MHz, CDCl<sub>3</sub>) δ 7.30 – 7.19 (m, 8H), 7.19 – 7.11 (m, 2H), 3.87 (t, *J* = 7.8 Hz, 1H), 2.02 (q, *J* = 7.7 Hz, 2H), 1.34 – 1.18 (m, 20H), 0.87 (t, *J* = 6.8 Hz, 3H); <sup>13</sup>C NMR (101 MHz, CDCl<sub>3</sub>) δ 145.4, 128.4, 127.9, 126.0, 51.4, 35.8, 31.9, 29.7, 29.7, 29.5, 29.4, 28.1, 22.7, 14.2.

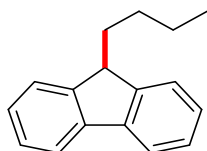

9-Butyl-9H-fluorene (**3q**)<sup>12</sup> was obtained as a colorless oil with (46.7 mg, 70%, from **1q**; 35.0 mg, 53%, from **5h**).

<sup>1</sup>H NMR (400 MHz, CDCl<sub>3</sub>) δ 7.85 – 7.78 (m, 2H), 7.57 (d, *J* = 7.4 Hz, 2H), 7.46 – 7.32 (m, 4H), 4.03 (t, *J* = 5.9 Hz, 1H), 2.12 – 2.02 (m, 2H), 1.36 – 1.32 (m, 2H), 1.28 – 1.19 (m, 2H), 0.89 (t, *J* = 7.2 Hz, 3H); <sup>13</sup>C NMR (75 MHz, CDCl<sub>3</sub>) δ 147.7, 141.2, 126.9, 126.8, 124.4, 119.8, 47.5, 32.8, 27.8, 23.1, 14.0.

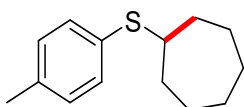

Cycloheptyl (*p*-tolyl) sulfane (**3r**)<sup>13</sup> was obtained as a colorless oil (52.2 mg, 79% yield).

<sup>1</sup>H NMR (300 MHz, CDCl<sub>3</sub>) δ 7.24 – 7.15 (m, 2H), 7.01 (d, *J* = 7.9 Hz, 2H), 3.17 (tt, *J* = 9.0, 4.1 Hz, 1H), 2.23 (s, 3H), 1.99 – 1.83 (m, 2H), 1.67 – 1.57 (m, 2H), 1.55 – 1.26 (m, 6H); <sup>13</sup>C NMR (75 MHz, CDCl<sub>3</sub>) δ 136.6, 132.0, 129.5, 48.6, 34.6, 28.2, 25.9, 21.0.

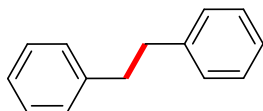

1,2-Diphenylethane (**3s**)<sup>1</sup> was obtained as a colorless oil (13.1 mg, 24% from **1s**; 4.9 mg, 9% from **1t**; 20.8 mg, 38% from **1u**).

<sup>1</sup>H NMR (300 MHz, CDCl<sub>3</sub>) δ 7.35 – 7.23 (m, 4H), 7.22 – 7.16 (m, 6H), 2.92 (s, 4H); <sup>13</sup>C NMR (101 MHz, CDCl<sub>3</sub>) δ 141., 128.5, 128.3, 125.9, 37.9.

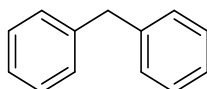

Diphenylmethane (**6a**)<sup>14</sup> was obtained as a colorless oil (31.8 mg, 63%, from **5a**; 44.4 mg, 88%, from **5k**; 38.5 mg, 76%, from **5l**; 100.3 mg, 99%, from **5m**; 11.1 mg, 22%, from **5p**; 25.3 mg, 50%, from **5q**; 47.1 mg, 93%, from **5s**).

<sup>1</sup>H NMR (300 MHz, CDCl<sub>3</sub>) δ 7.32 – 7.24 (m, 4H), 7.22 – 7.17 (m, 6H), 3.98 (s, 2H); <sup>13</sup>C NMR (101 MHz, CDCl<sub>3</sub>) δ 141.2, 128.9, 128.5, 126.1, 42.0.

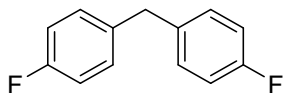

Bis(4-fluorophenyl) methane (**6b**)<sup>14</sup> was obtained as a colorless oil (25.1 mg, 41% yield).

<sup>1</sup>H NMR (300 MHz, CDCl<sub>3</sub>) δ 7.29 (d, *J* = 8.6 Hz, 3H), 7.24 – 7.14 (m, 6H), 3.97 (s, 2H); <sup>13</sup>C NMR (101 MHz, CDCl<sub>3</sub>) δ 141.3, 129.52, 128.7, 126.3, 42.2.

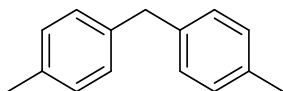

Di-*p*-tolylmethane (**6c**)<sup>14</sup> was obtained as a colorless oil (31.2 mg, 53% yield).

<sup>1</sup>H NMR (300 MHz, CDCl<sub>3</sub>) δ 7.15 (s, 8H), 3.98 (s, 2H), 2.38 (s, 6H); <sup>13</sup>C NMR (101 MHz, CDCl<sub>3</sub>) δ 138.5, 135.5, 129.2, 128.9, 41.2, 21.1.

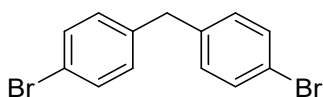

Bis(4-bromophenyl) methane (**6d**)<sup>15</sup> was obtained as a colorless oil (49.9 mg, 51% yield).

<sup>1</sup>H NMR (400 MHz, CDCl<sub>3</sub>) δ 7.39 – 7.30 (m, 4H), 7.31 – 7.21 (m, 4H), 4.05 (s, 2H); <sup>13</sup>C NMR (101 MHz, CDCl<sub>3</sub>) δ 141.2, 129.0, 128.6, 126.2, 42.0.

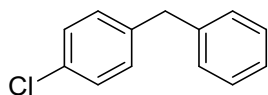

1-Benzyl-4-chlorobenzene (**6e**)<sup>15</sup> was obtained as a colorless oil (18.8 mg, 31% yield).

<sup>1</sup>H NMR (300 MHz, CDCl<sub>3</sub>) δ 7.29 (d, *J* = 8.6 Hz, 3H), 7.24 – 7.14 (m, 6H), 3.97 (s, 2H); <sup>13</sup>C NMR (101 MHz, CDCl<sub>3</sub>) δ 141.3, 129.2, 128.7, 126.3, 42.2.

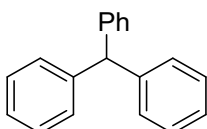

Triphenylmethane (**6f**)<sup>16</sup> was obtained as a white solid at room temperature with (69.6 mg, 95%, from **5f**; 71.8 mg, 98%, from **5j**; 56.4 mg, 77%, from **5n**; 71.8 mg, 98%, from **5o**; 69.6 mg, 95%, from **5r**).

<sup>1</sup>H NMR (300 MHz, CDCl<sub>3</sub>) δ 7.33 – 7.14 (m, 9H), 7.16 – 7.07 (m, 6H), 5.55 (s, 1H); <sup>13</sup>C NMR (75 MHz, CDCl<sub>3</sub>) δ 143.7, 129.3, 128.1, 126.1, 56.7.

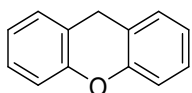

9H-xanthene (**6g**)<sup>17</sup> was obtained as a colorless oil (24.0 mg, 44% yield).

<sup>1</sup>H NMR (400 MHz, CDCl<sub>3</sub>) δ 7.27 – 7.16 (m, 4H), 7.11 – 7.01 (m, 4H), 4.08 (s, 2H); <sup>13</sup>C NMR (75 MHz, CDCl<sub>3</sub>) δ 128.9, 127.6, 123.0, 116.5, 27.9.

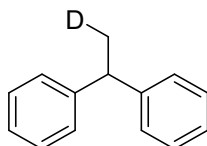

Deuterium ethane-1,1-diylidibenzene (**7a**)<sup>18</sup> was obtained as a colorless oil (42.9 mg, 78% yield).

<sup>1</sup>H NMR (400 MHz, CDCl<sub>3</sub>) δ 7.27 (t, *J* = 7.4 Hz, 4H), 7.25 – 7.18 (m, 4H), 7.17 – 7.15 (m, 2H), 4.15 (q, *J* = 6.7 Hz, 1H), 1.63 (t, *J* = 6.9 Hz, 2H).

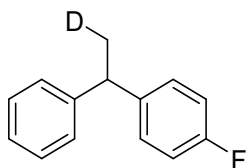

Deuterium 1-fluoro-4-(1-phenylethyl) benzene (**7b**) was obtained as a colorless oil (52.5 mg, 87% yield).

<sup>1</sup>H NMR (400 MHz, CDCl<sub>3</sub>) δ 7.33 – 7.23 (m, 2H), 7.23 – 7.13 (m, 5H), 6.96 (t, *J* = 8.7 Hz, 2H), 4.12 (t, *J* = 6.1 Hz, 1H), 1.63 – 1.58 (m, 2H); IR (film): ν 2924, 2860, 1606, 1508, 1446 cm<sup>-1</sup>; HRMS (EI) calcd for C<sub>14</sub>H<sub>12</sub>DF (M): 201.1064, found: 201.1075.

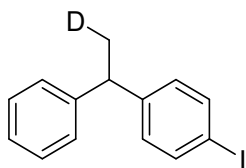

Deuterium 1-iodo-4-(1-phenylethyl) benzene (**7c**) was obtained as a colorless oil (45.4 mg, 49% yield).



$^1\text{H}$  NMR (400 MHz,  $\text{CDCl}_3$ )  $\delta$  7.58 (d,  $J = 8.1$  Hz, 2H), 7.25 (s, 2H), 7.21 – 7.15 (m, 3H), 6.96 (d,  $J = 8.0$  Hz, 2H), 4.19 – 4.02 (m, 1H), 1.65 – 1.55 (m, 2H); IR (film):  $\nu$  3057, 3020, 2958, 2937, 1481, 1452, 1398  $\text{cm}^{-1}$ ; HRMS (EI) calcd for  $\text{C}_{14}\text{H}_{12}\text{D}$  (M): 309.0125, found: 309.0121.

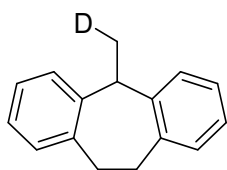

Deuterium 5-Methyl-10,11-dihydro-5H-dibenzo[a,d][7]annulene (**7d**) was obtained as a colorless oil (47.7 mg, 76% yield).

$^1\text{H}$  NMR (300 MHz,  $\text{CDCl}_3$ )  $\delta$  7.21 – 7.13 (m, 2H), 7.12 – 6.99 (m, 6H), 4.44 – 4.33 (m, 1H), 3.15 (s, 4H), 1.67 – 1.63 (m, 2H); IR (film):  $\nu$  3053, 3014, 2926, 2248, 2220, 1489, 1460  $\text{cm}^{-1}$ ; HRMS (EI) calcd for  $\text{C}_{16}\text{H}_{15}\text{D}$  (M): 209.1315, found: 209.1325.

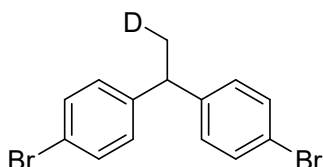

Deuterium 4,4'-(ethane-1,1-diyl) bis(bromobenzene) (**7e**) was obtained as a white solid at room temperature (59.3 mg, 58% yield).

$^1\text{H}$  NMR (300 MHz,  $\text{CDCl}_3$ )  $\delta$  7.40 – 7.36 (m, 4H), 7.04 (d,  $J = 8.4$  Hz, 4H), 4.04 (t,  $J = 6.1$  Hz, 1H), 1.58 – 1.54 (m, 2H); IR (film):  $\nu$  2353, 1485  $\text{cm}^{-1}$ ; HRMS (EI) calcd for  $\text{C}_{14}\text{H}_{11}\text{DBr}_2$  (M): 338.9369, found: 338.9366.

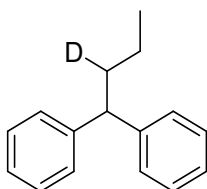

Deuterium butane-1,1-diyl dibenzene (**7f**) was obtained as a colorless oil (48.2 mg, 76% yield).

$^1\text{H}$  NMR (300 MHz,  $\text{CDCl}_3$ )  $\delta$  7.26 – 7.22 (m, 5H), 3.89 (d,  $J = 6.8$  Hz, 1H), 1.99 (d,  $J = 7.6$  Hz, 1H), 1.25 (d,  $J = 7.1$  Hz, 2H), 0.91 (t,  $J = 7.3$  Hz, 3H); IR (film):  $\nu$  3062, 3028, 2954, 2926, 2872, 1600, 1490, 1448  $\text{cm}^{-1}$ ; HRMS (EI) calcd for  $\text{C}_{16}\text{H}_{17}\text{D}$  (M): 211.1471, found: 211.1470.

## 7. References

1. N. Ishida, Y. Kamae, K. Ishizu, Y. Kamino, H. Naruse and M. Murakami, Sustainable system for hydrogenation exploiting energy derived from solar light. *J. Am. Chem. Soc.*, 2021, **143**, 2217-2220.
2. M. L. Czyz, M. S. Taylor, T. H. Horngren and A. Polyzos, Reductive activation and hydrofunctionalization of olefins by multiphoton tandem photoredox catalysis. *ACS Catal.*, 2021, **11**, 5472-5480.
3. I. Chatterjee and M. Oestreich, Brønsted acid-catalyzed transfer hydrogenation of imines and alkenes using cyclohexa-1,4-dienes as dihydrogen surrogates. *Org. Lett.*, 2016, **18**, 2463-2466.
4. H. H. Szmant and R. Yoncoskie, The synthesis and some reactions of the p-cyano derivatives of 1,1-diphenylethane. *J. Org. Chem.*, 1956, **21**, 78-81.
5. W. Yuan, P. Orecchia and M. Oestreich, Cyclohexa-1,3-diene-based dihydrogen and hydrosilane surrogates in  $\text{B}(\text{C}_6\text{F}_5)_3$ -catalysed transfer processes. *Chem. Comm.*, 2017, **53**, 10390-10393.
6. T. Vom Stein, M. Pérez, R. Dobrovetsky, D. Winkelhaus, C. B. Caputo and D. W. Stephan, Electrophilic fluorophosphonium cations in frustrated Lewis pair hydrogen activation and catalytic hydrogenation of olefins. *Angew. Chem. Int. Ed.*, 2015, **54**, 10178-10182.
7. A. E. Bosnidou and K. Muñiz, Intermolecular radical  $\text{C}(\text{sp}^3)\text{-H}$  amination under iodine catalysis. *Angew. Chem. Int. Ed.*, 2019, **58**, 7485-7489.
8. T. N. Gieshoff, U. Chakraborty, M. Villa and A. Jacobi von Wangelin, Alkene hydrogenations by soluble iron nanocluster catalysts. *Angew. Chem. Int. Ed.*, 2017, **56**, 3585-3589.
9. R. P. Clausen, E. K. Moltzen, J. Perregaard, S. M. Lenz, C. Sanchez, E. Falch and P. Krosggaard-Larsen, Selective inhibitors of GABA uptake: synthesis and molecular pharmacology of 4-N-methylamino-4,5,6,7-tetrahydrobenzo[d]isoxazol-3-ol analogues. *Bioorg. Med. Chem.*, 2005, **13**, 895-908.
10. L. Peng, Y. Li, Y. Li, W. Wang, H. Pang and G. Yin, Ligand-controlled nickel-catalyzed reductive relay cross-coupling of alkyl bromides and aryl bromides. *ACS Catal.*, 2018, **8**, 310-313.

11. X. Zhu, M. Su, Q. Zhang, Y. Li and H. Bao, Cu-catalyzed alkylarylation of vinylarenes with masked alkyl electrophiles. *Org. Lett.*, 2020, **22**, 620-625.
12. M. A. Shaikh, S. G. Agalave, A. S. Ubale and B. Gnanaprakasam, Ligand-free Ru-catalyzed direct sp<sup>3</sup> C–H alkylation of fluorene using alcohols. *J. Org. Chem.*, 2020, **85**, 2277-2290.
13. S. Liu, S. Jin, H. Wang, Z. Qi, X. Hu, B. Qian and H. Huang, Nickel-catalyzed oxidative dehydrogenative coupling of alkane with thiol for C(sp<sup>3</sup>)-S bond formation. *Tetrahedron Lett.*, 2021, **68**, 152950.
14. W. C. Spaller, J. Q. Lu and B. J. Stokes, Tetrahydroxydiboron-mediated palladium-catalyzed deoxygenative transfer hydrogenation of aryl ketones. *Adv. Synth. Catal.*, 2022, **364**, 2571-2575.
15. Y. Cheng, W. Dong, L. Wang, K. Parthasarathy and C. Bolm, Iron-catalyzed hetero-cross-dehydrogenative coupling reactions of sulfoximines with diarylmethanes: A new route to N-alkylated sulfoximines. *Org. Lett.*, 2014, **16**, 2000-2002.
16. F. T. Pulikottil, R. Pilli, V. Murugesan, C. G. Krishnan and R. Rasappan, A free-radical reduction and cyclization of alkyl halides mediated by FeCl<sub>2</sub>. *ChemCatChem.*, 2019, **11**, 2438-2442.
17. S. C. A. Sousa, T. A. Fernandes and A. C. Fernandes, Highly efficient deoxygenation of aryl ketones to arylalkanes catalyzed by dioxidomolybdenum complexes. *Eur. J. Org. Chem.*, 2016, **18**, 3109-3112.
18. G. Kumar, D. Bhattacharya, P. Mistry, I. Chatterjee, In-Catalyzed Transfer Hydrogenation and Regioselective Hydrogen–Deuterium Addition to the Olefins. *J. Org. Chem.*, 2023, **88**, 6987-6994.

## 8. Product NMR Spectra

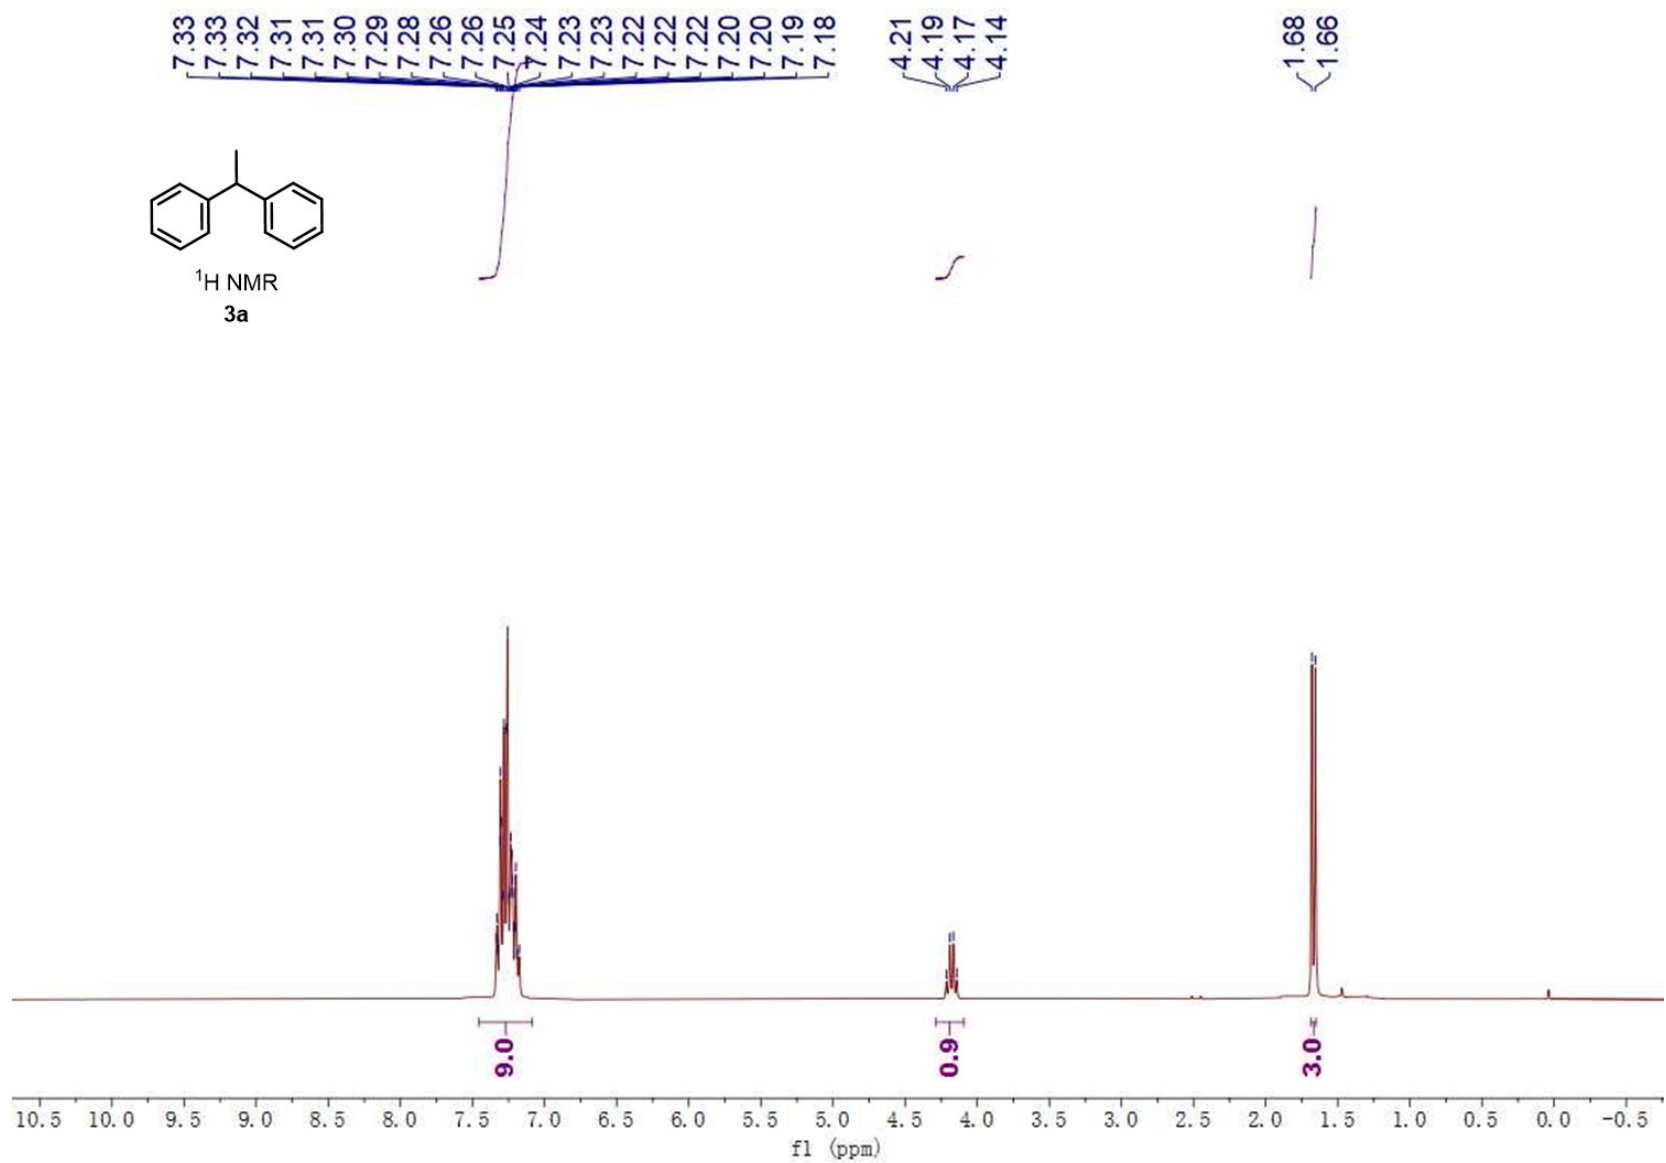

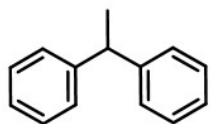

<sup>13</sup>C NMR  
**3a**

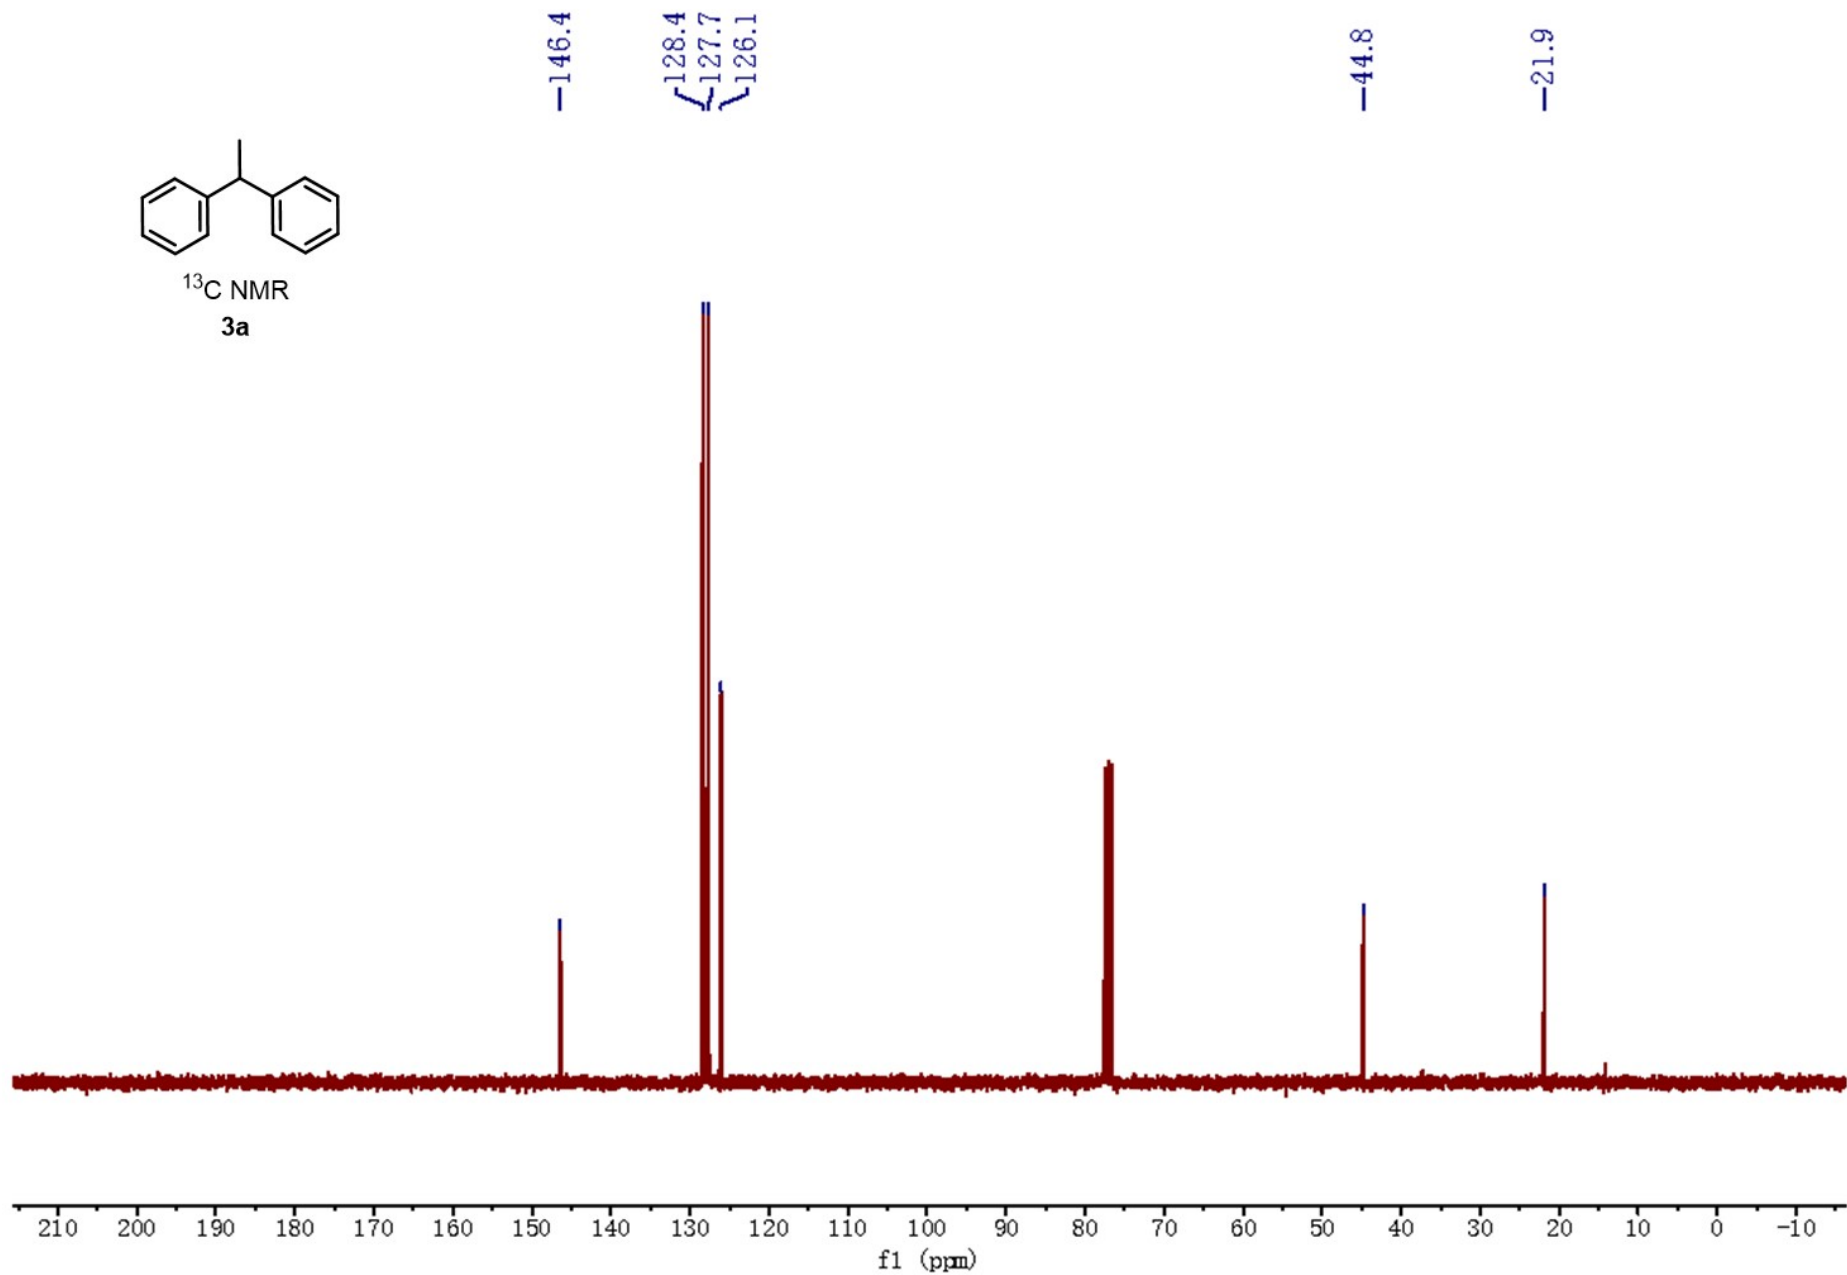

7.34  
7.34  
7.34  
7.33  
7.32  
7.32  
7.31  
7.30  
7.30  
7.24  
7.23  
7.22  
7.22  
7.21  
7.20  
7.20  
7.19  
7.19  
7.02  
7.01  
7.00  
7.00  
7.00  
6.99  
6.99  
6.98  
6.97  
6.20  
4.18  
4.16  
4.14

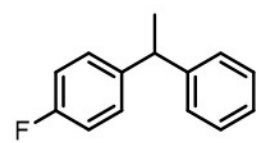

<sup>1</sup>H NMR  
3b

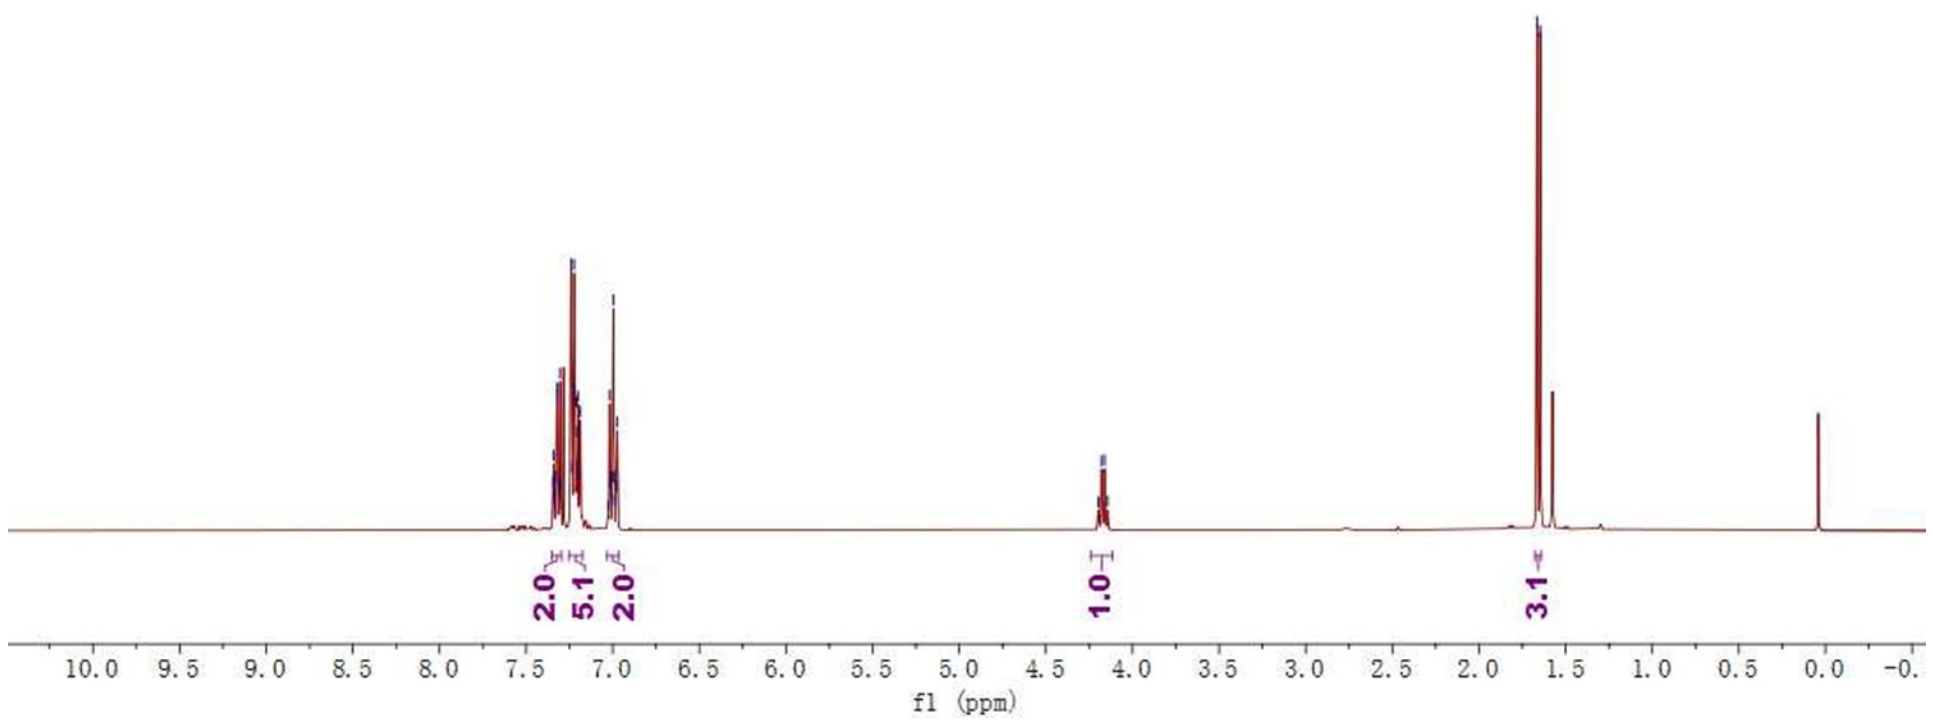

1.66  
1.65

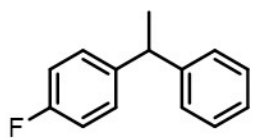

<sup>13</sup>C NMR  
**3b**

~162.5  
~160.1  
146.2  
142.1  
142.1  
129.1  
129.0  
128.5  
127.6  
126.2  
115.2  
115.0  
-44.1  
-22.1

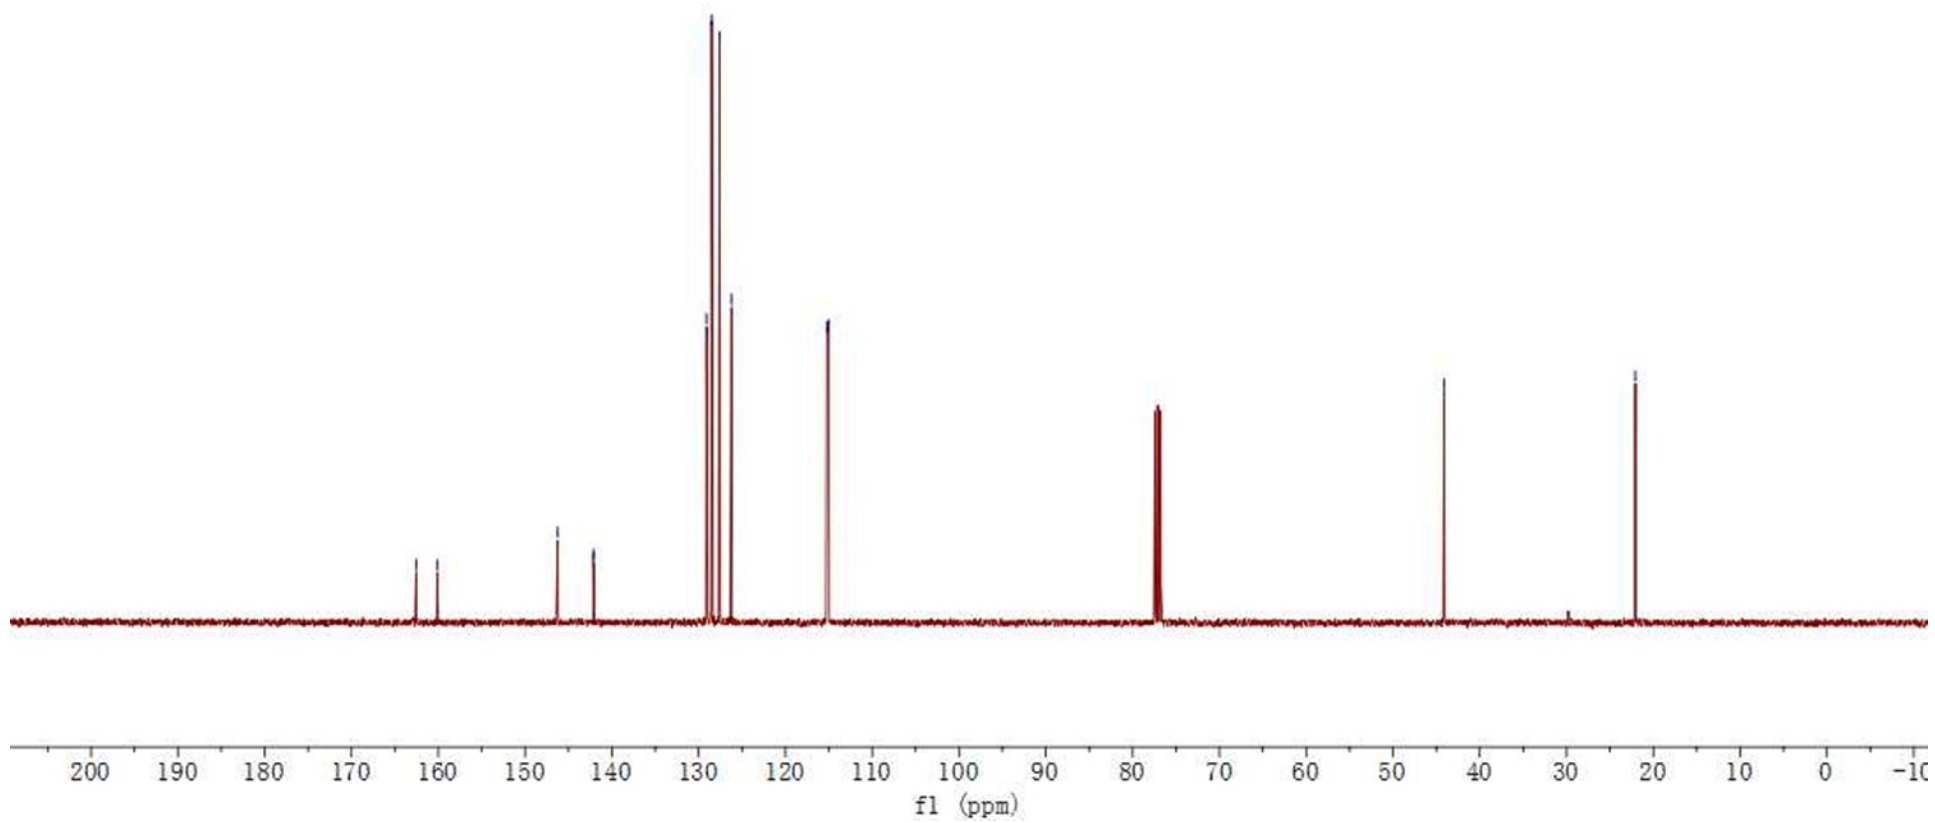

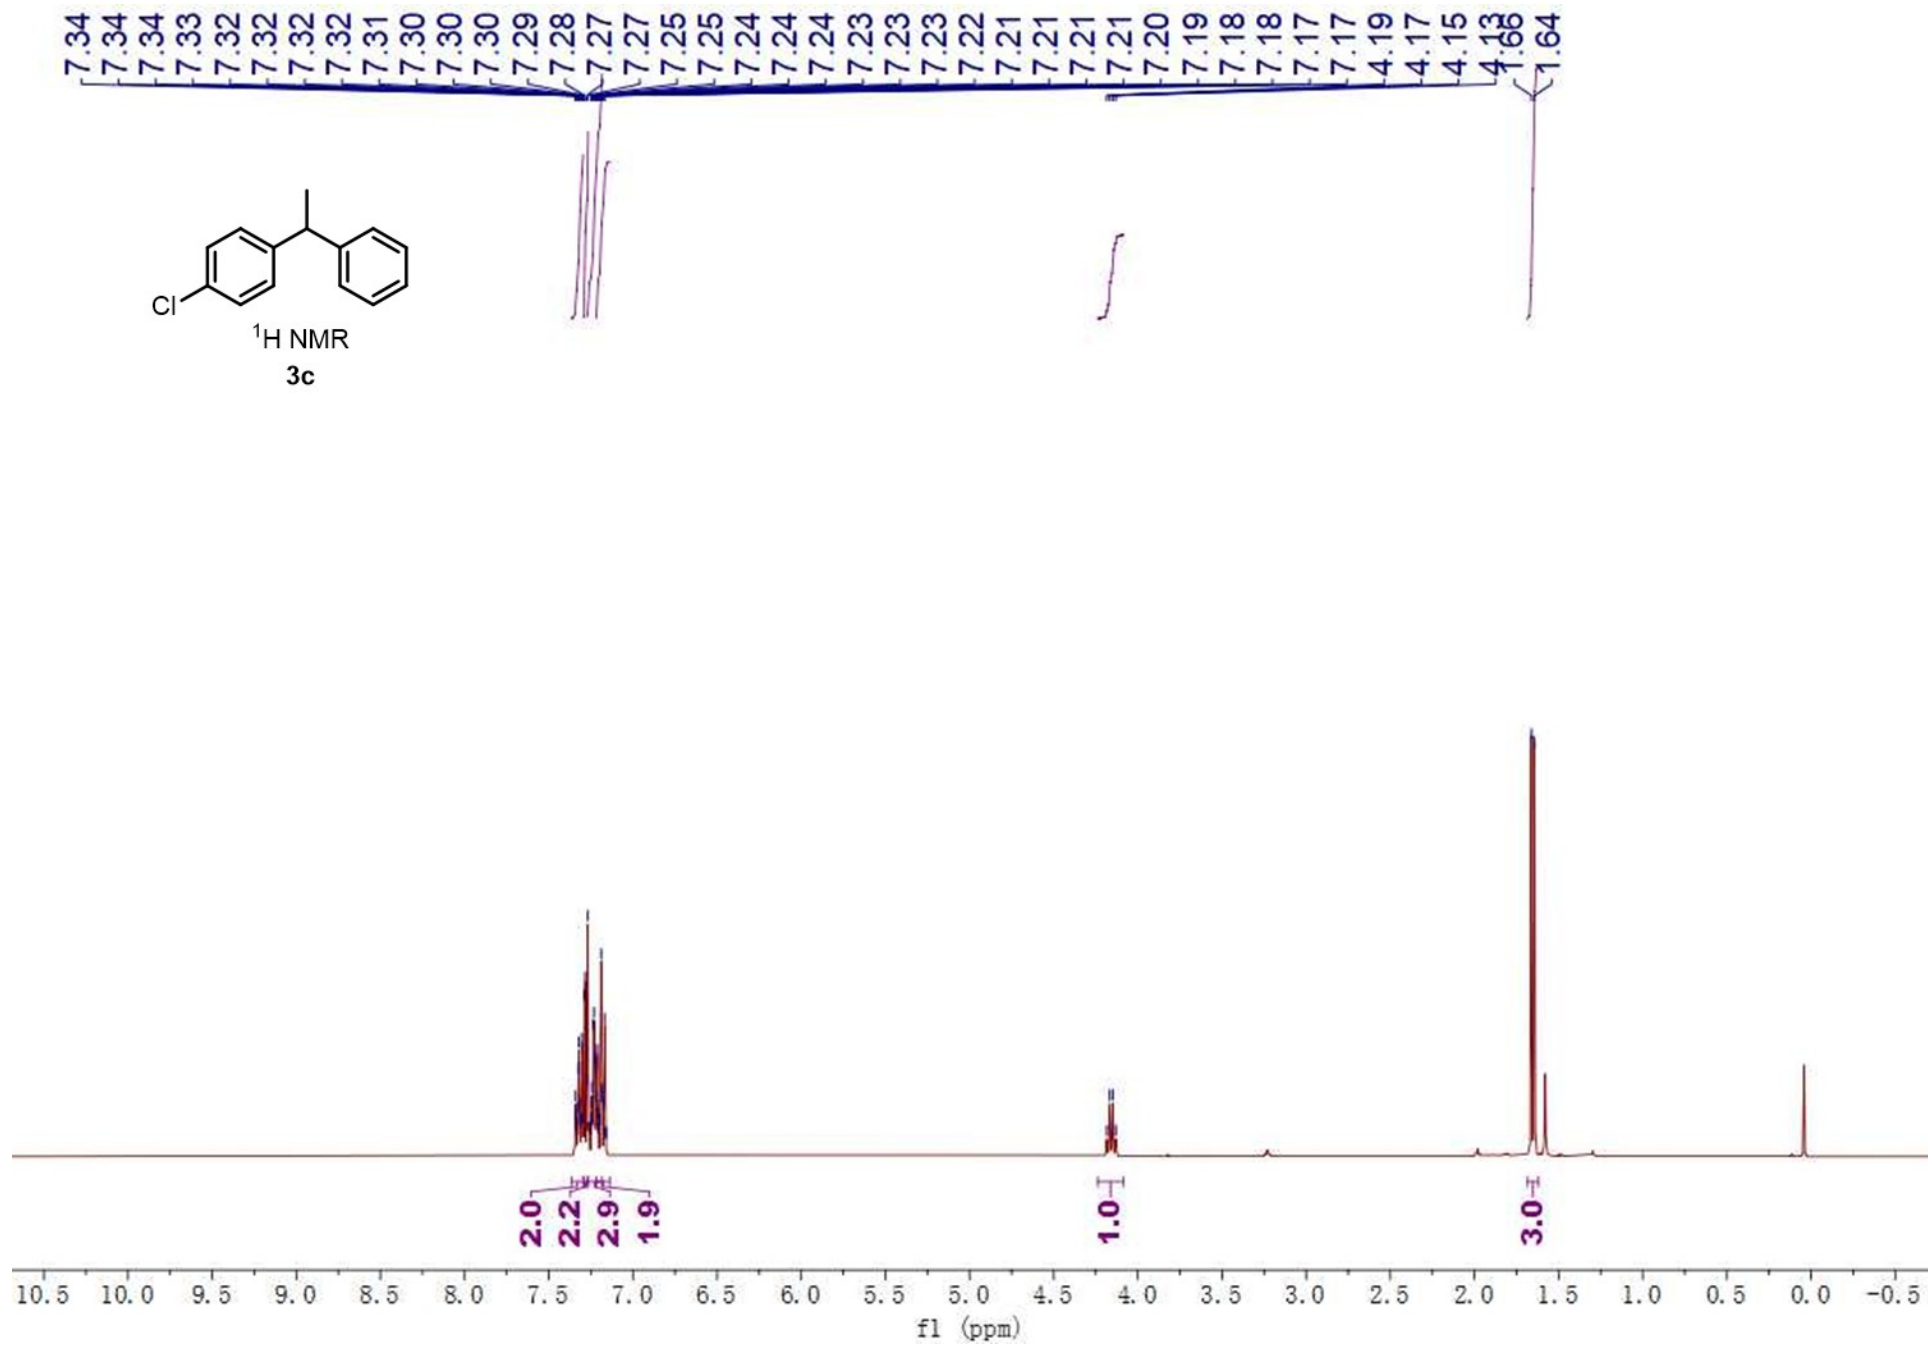

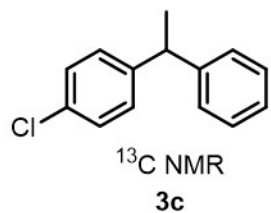

145.9  
145.0  
131.9  
129.1  
128.6  
128.6  
127.7  
126.4

-44.3

-21.9

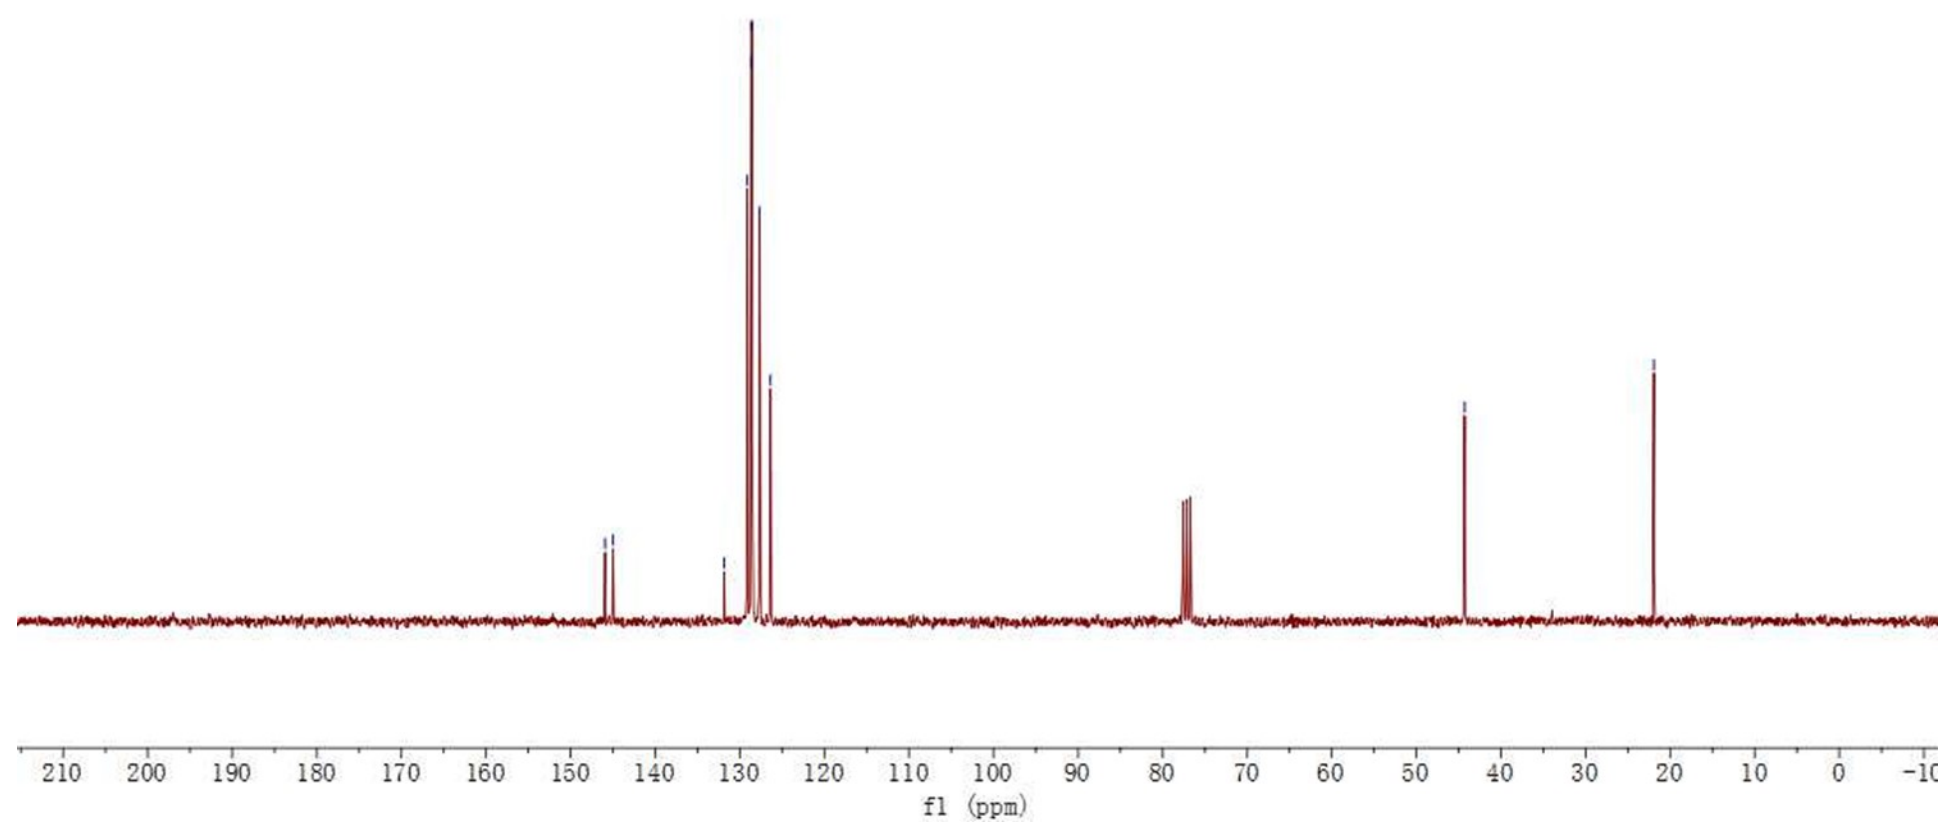



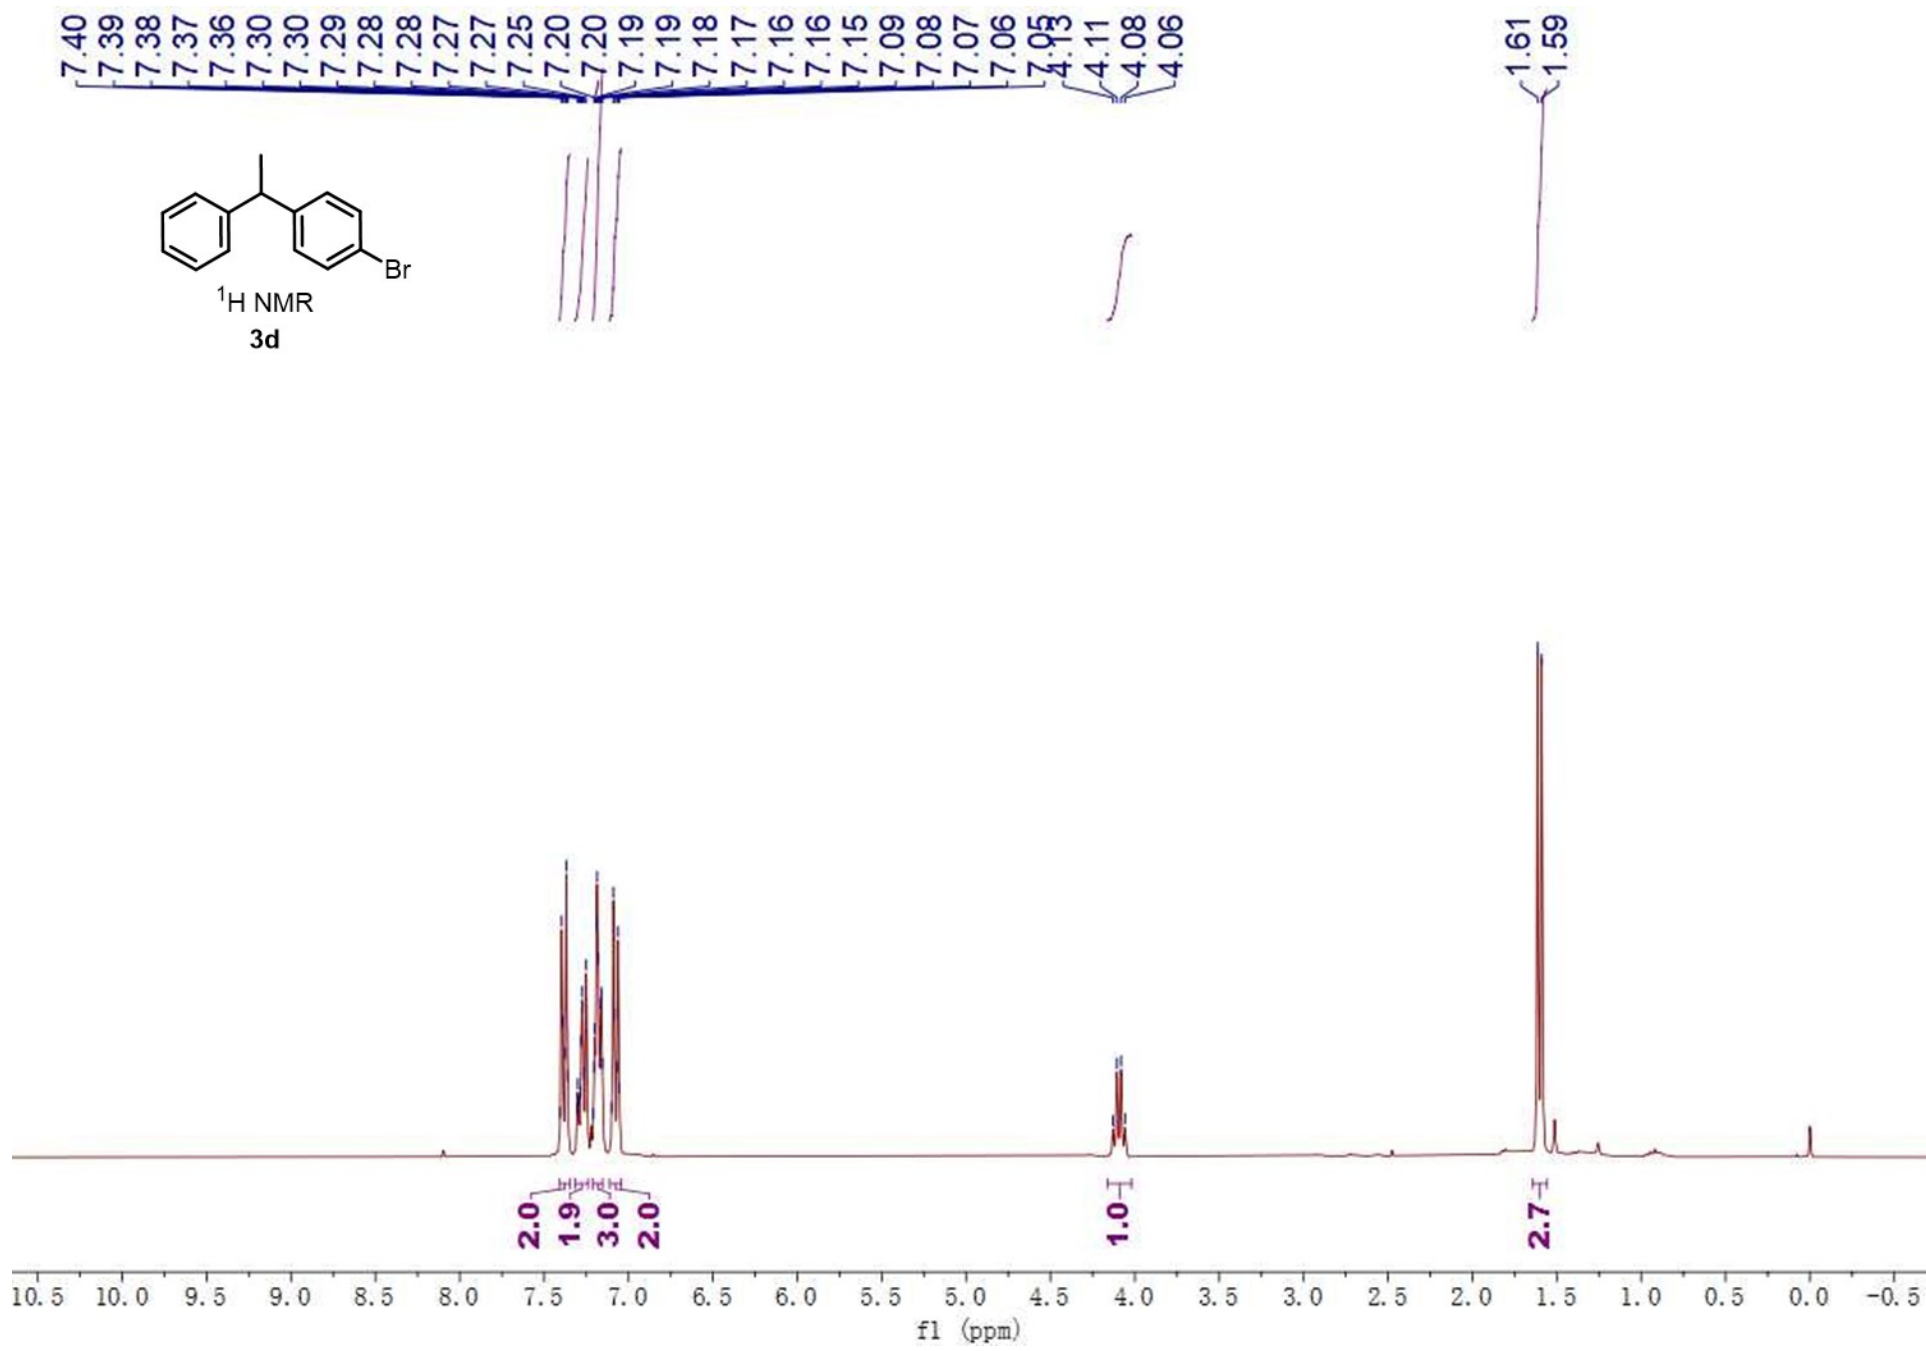

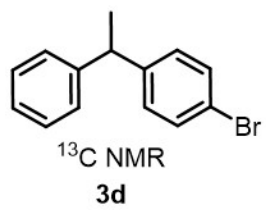

145.8  
145.5  
131.5  
129.5  
128.5  
127.6  
126.3  
119.9

-44.3

-21.8

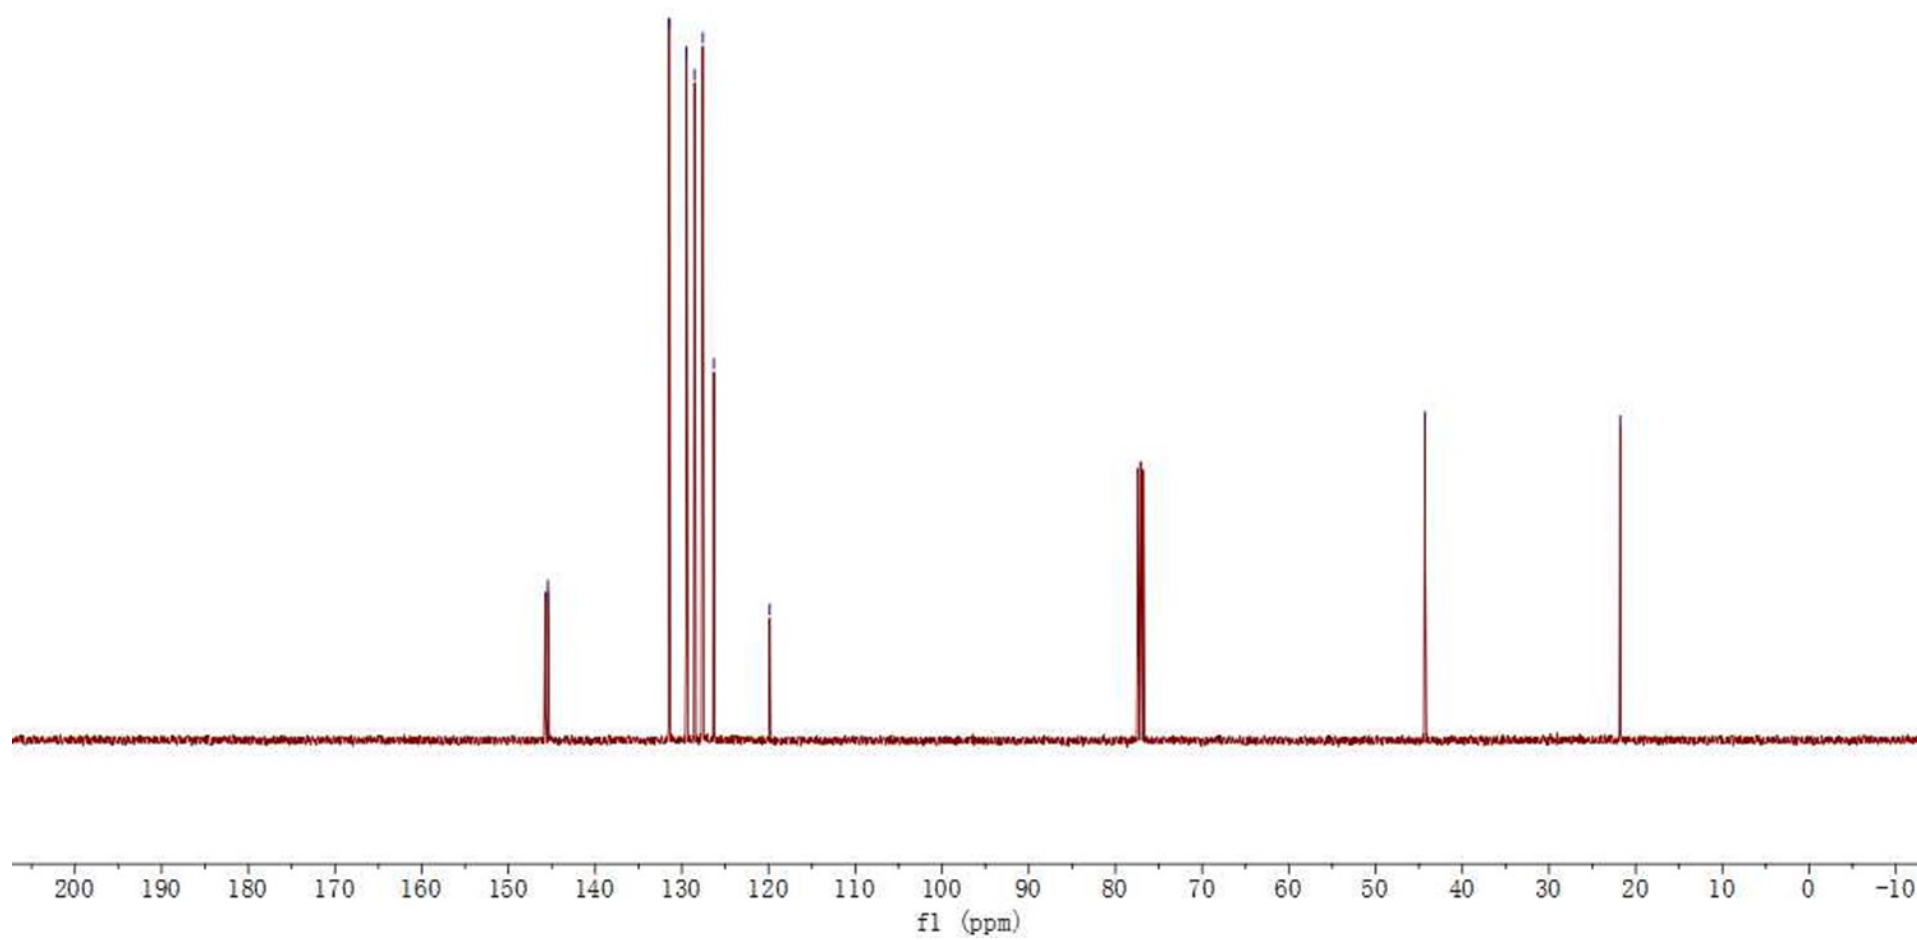

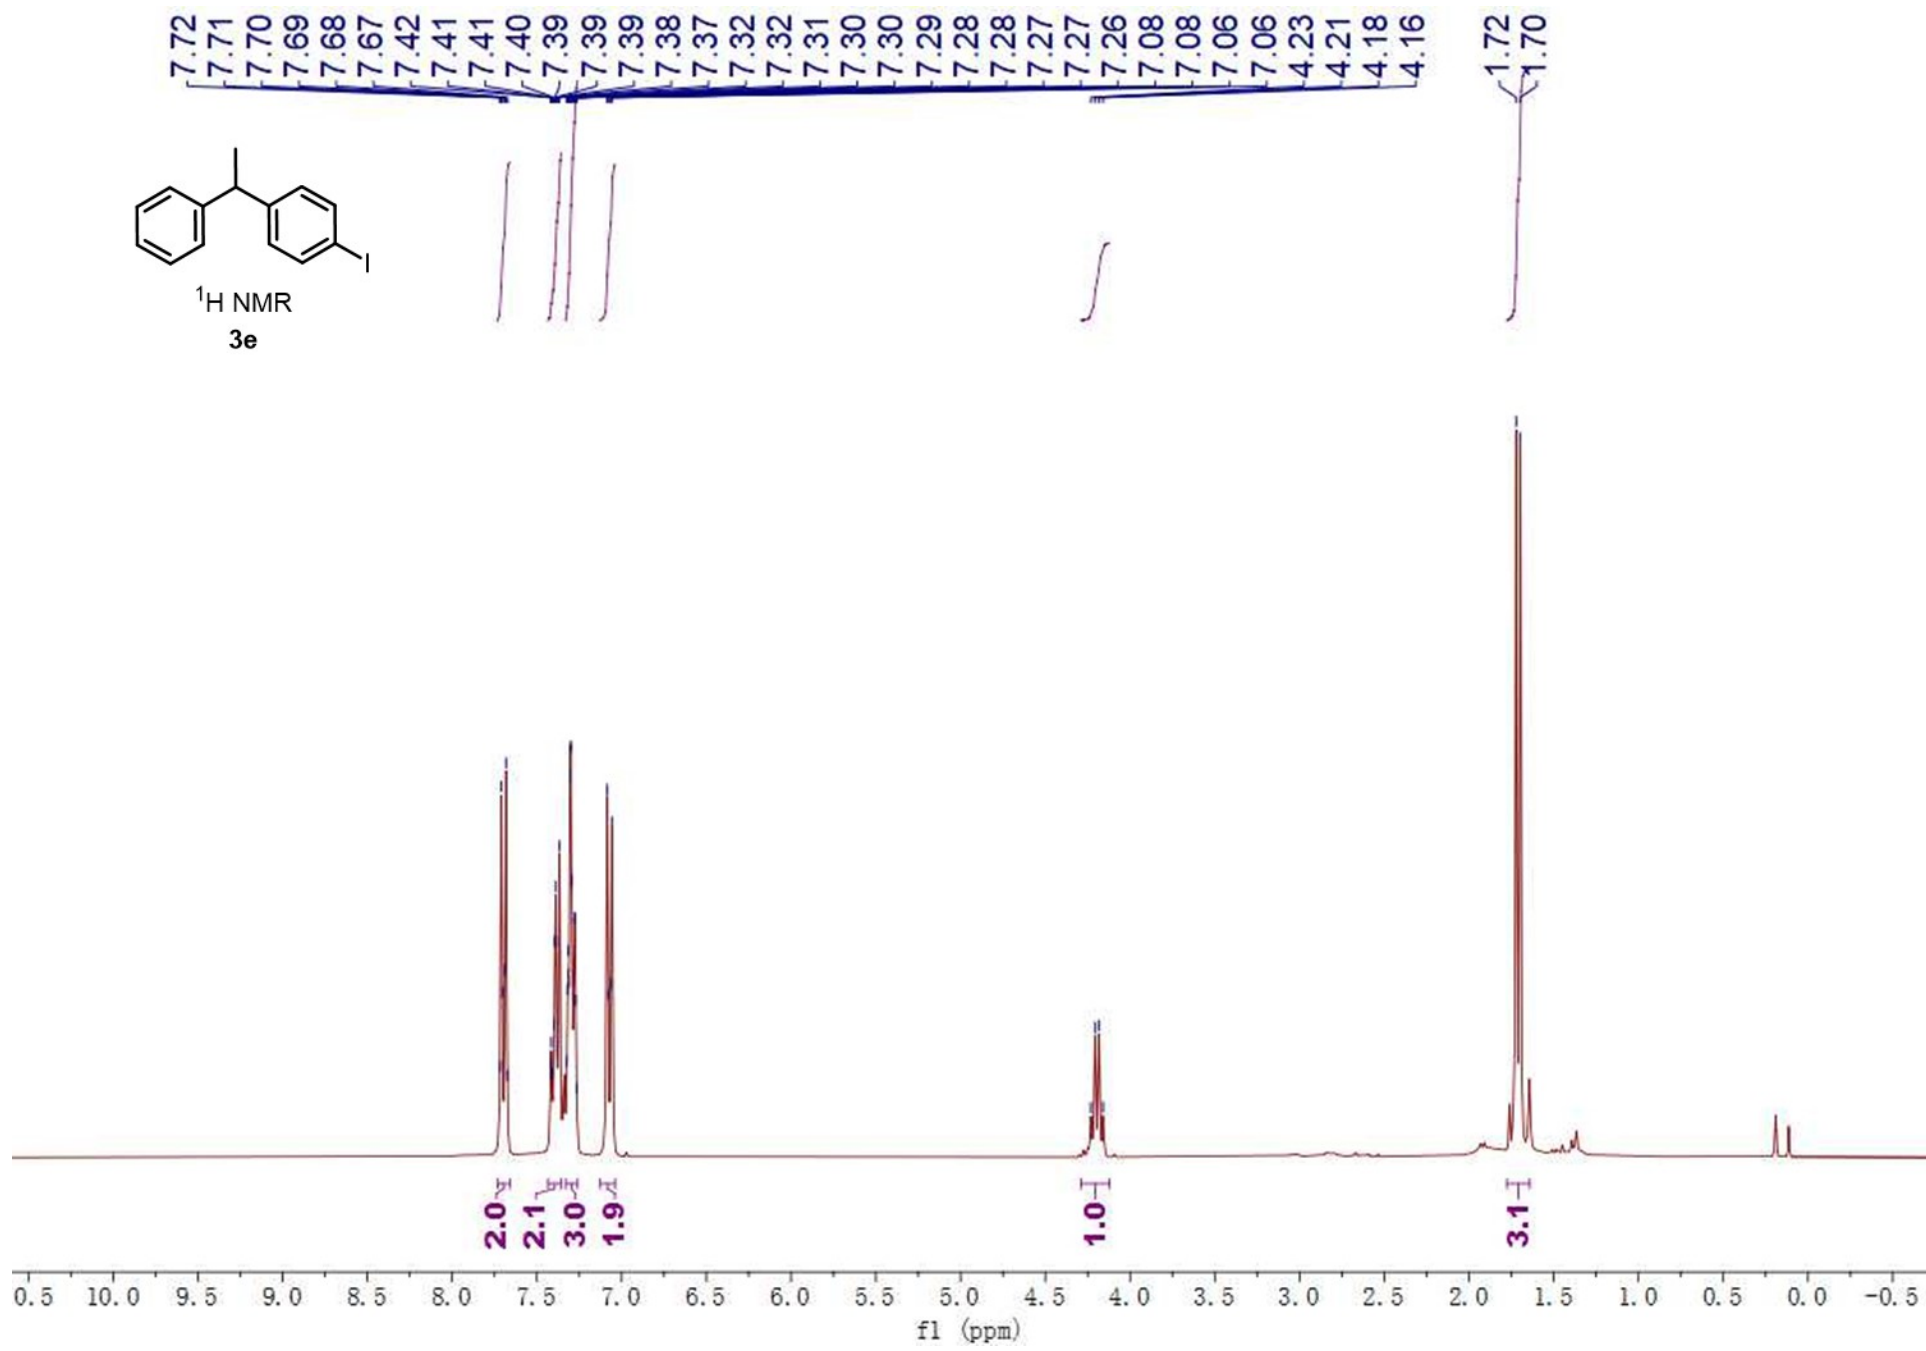

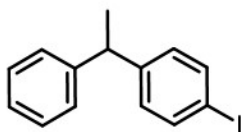

<sup>13</sup>C NMR  
3e

146.2  
145.8  
137.5  
129.9  
128.6  
127.7  
126.4

-91.4

-44.5

-21.8

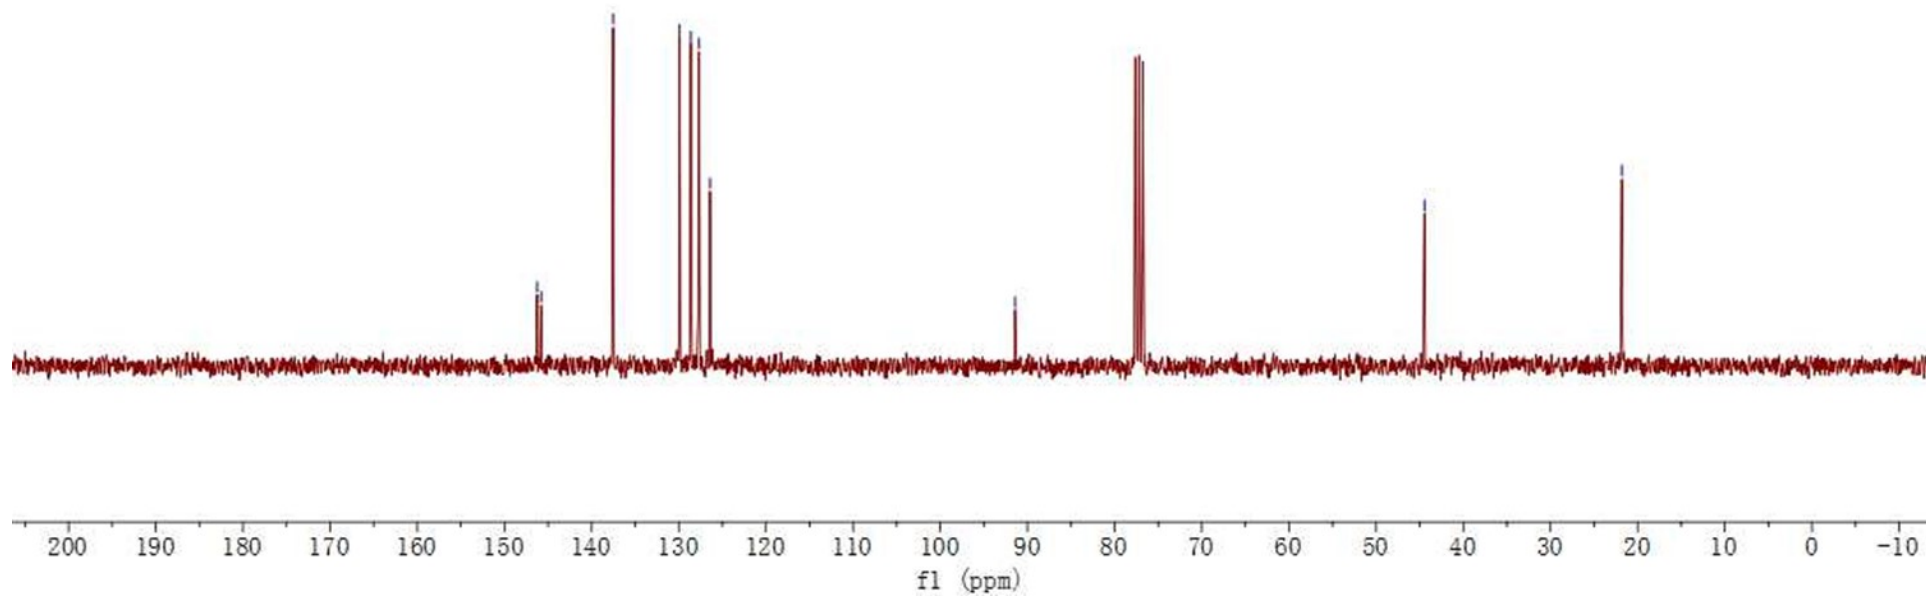

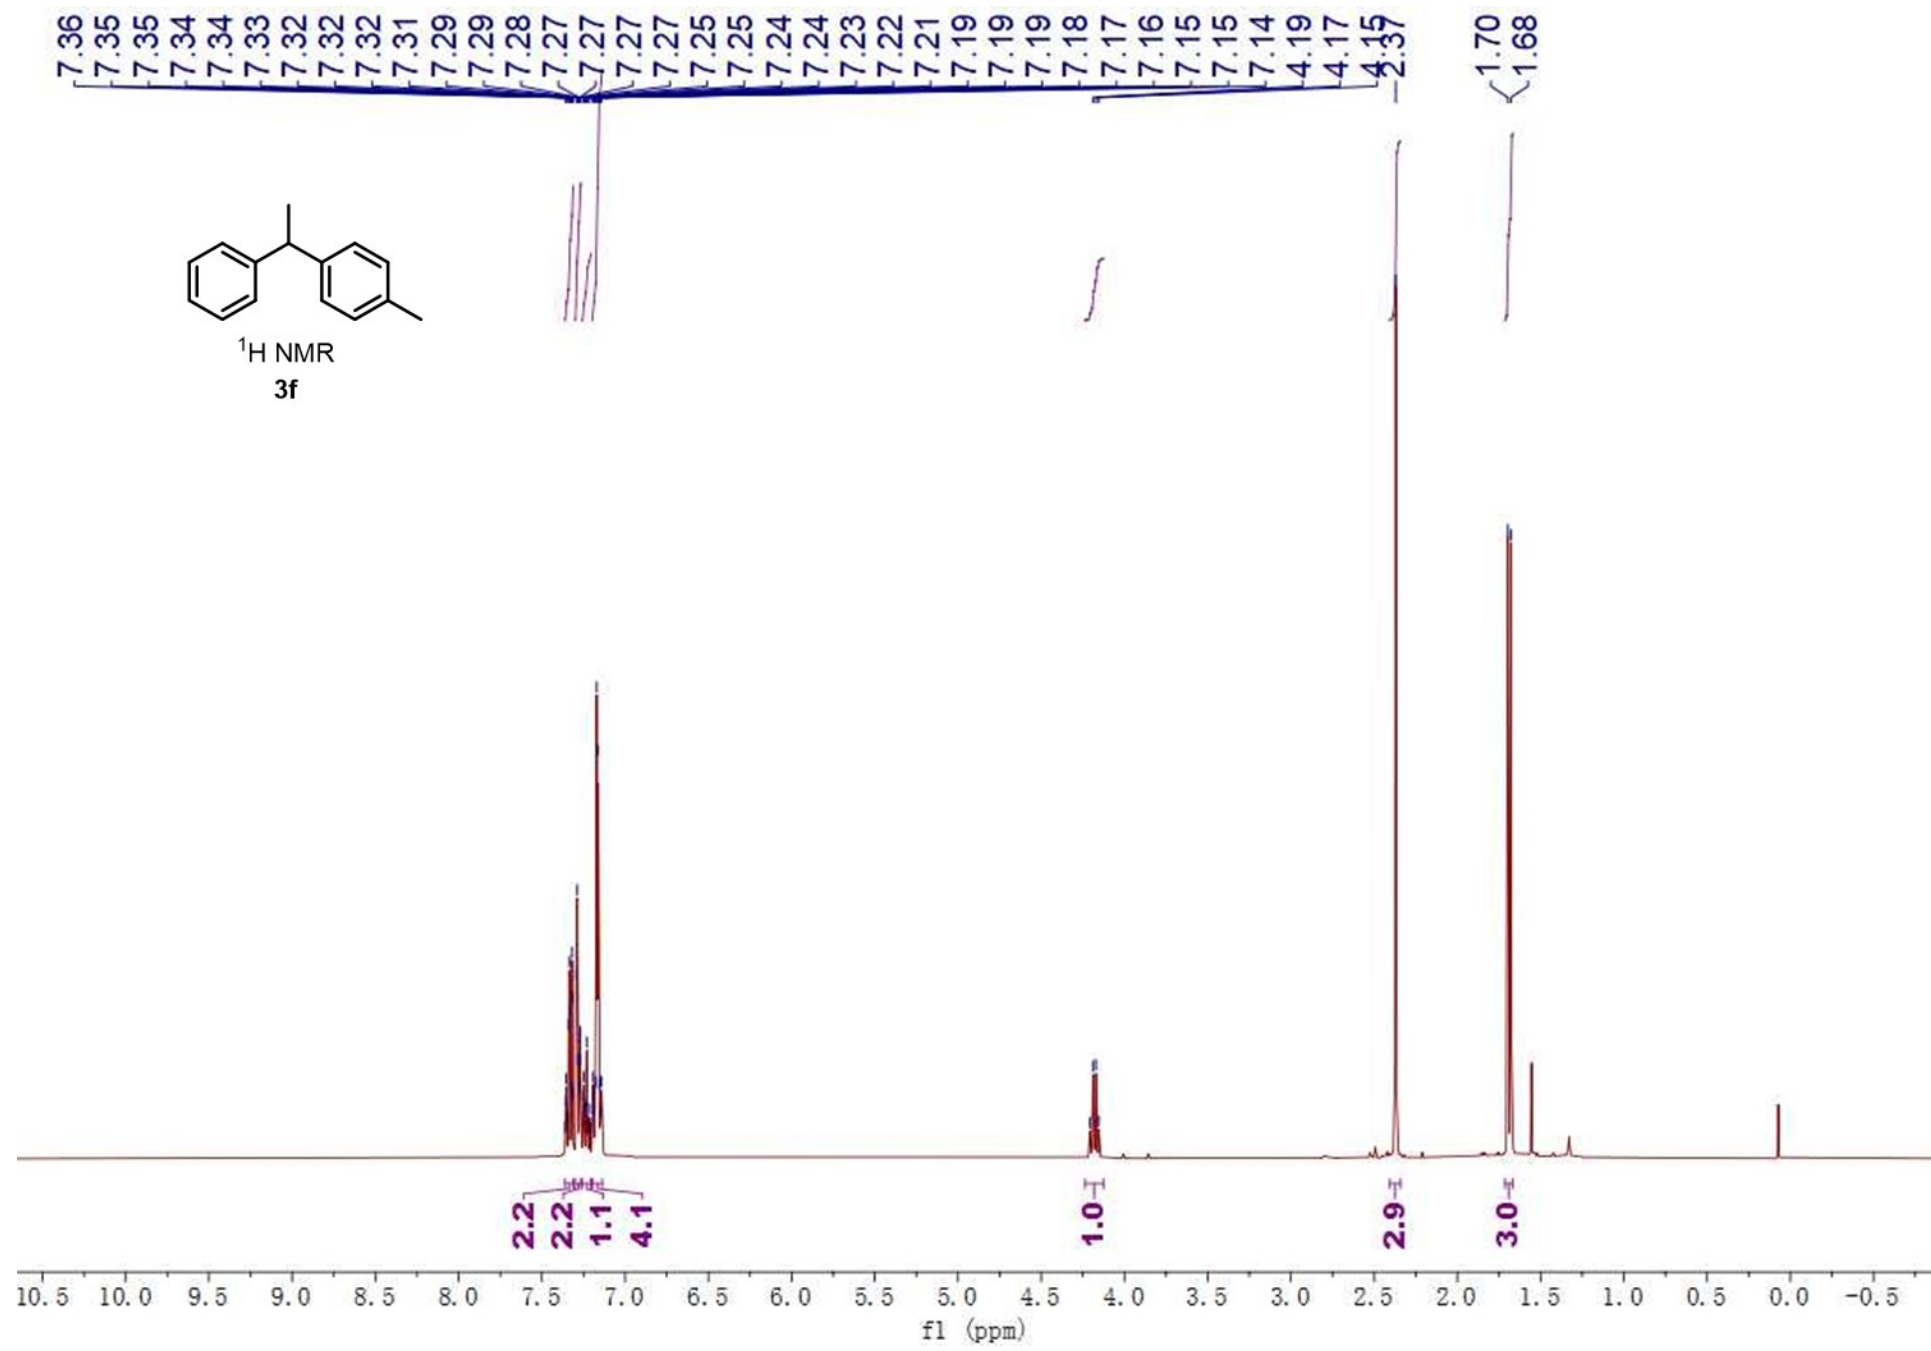

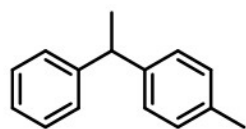

<sup>13</sup>C NMR  
3f

146.7  
143.5  
135.6  
129.1  
128.4  
127.7  
127.6  
126.0

-44.5

22.0  
21.1

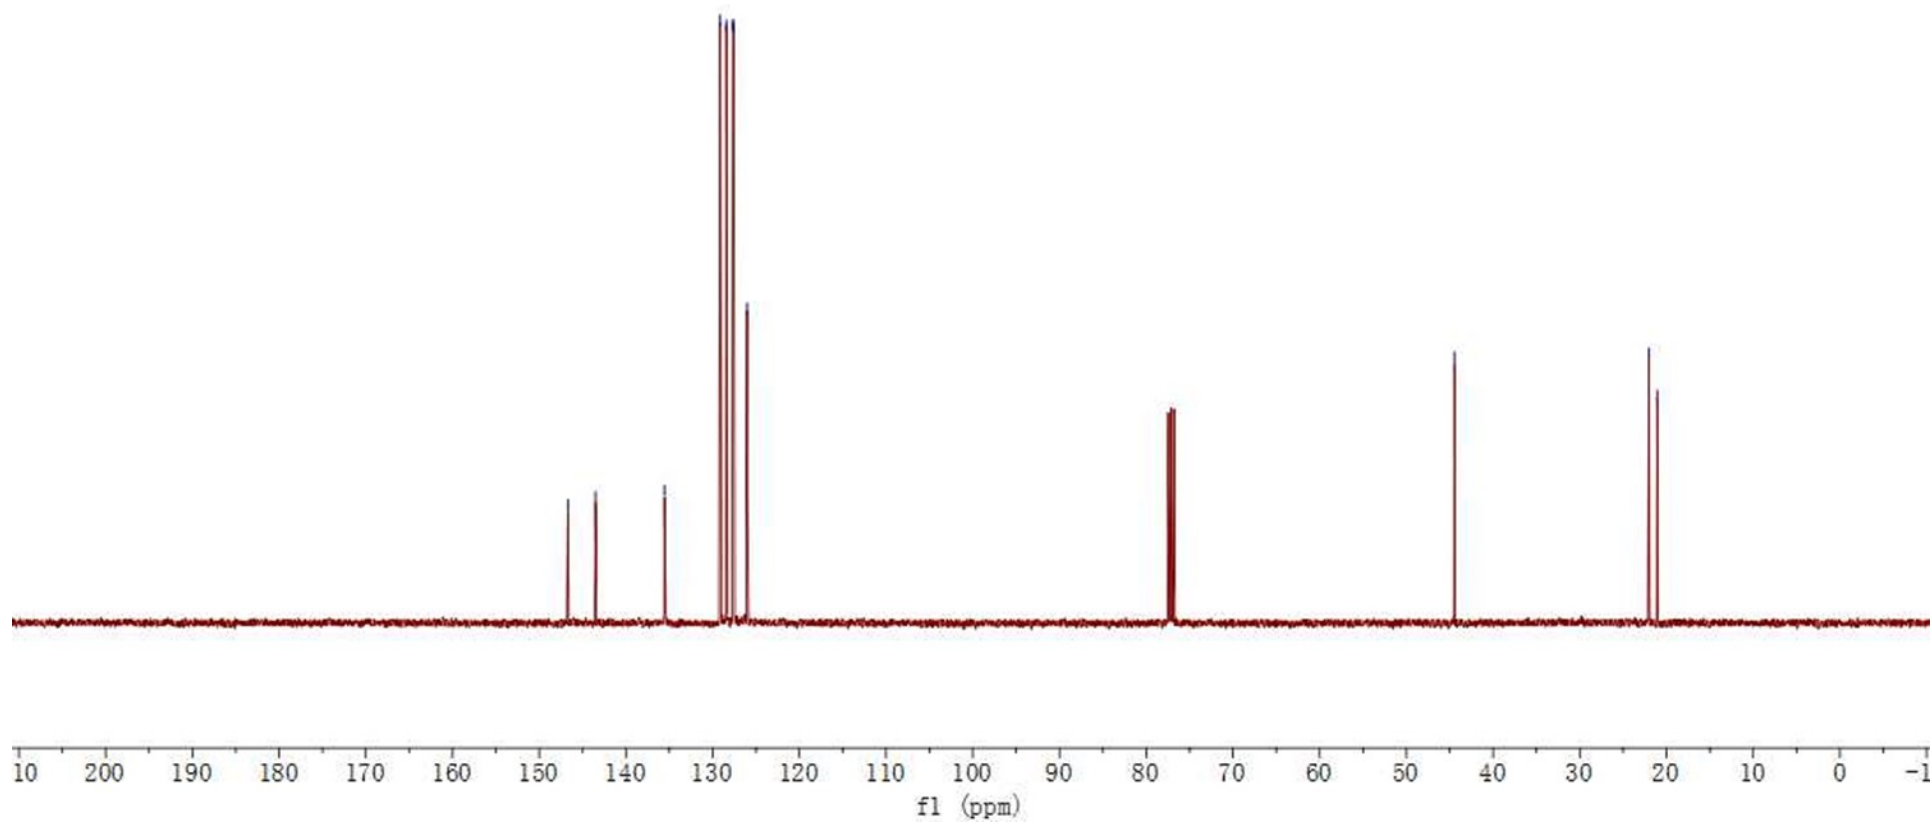

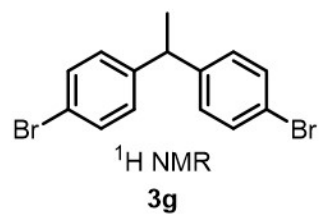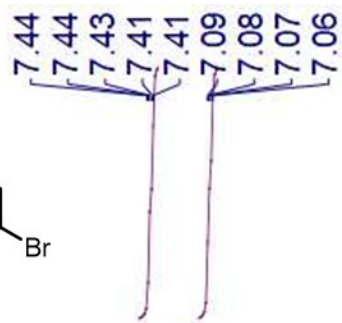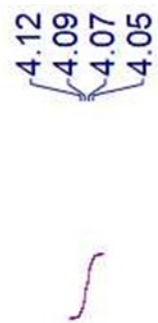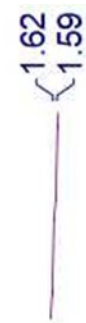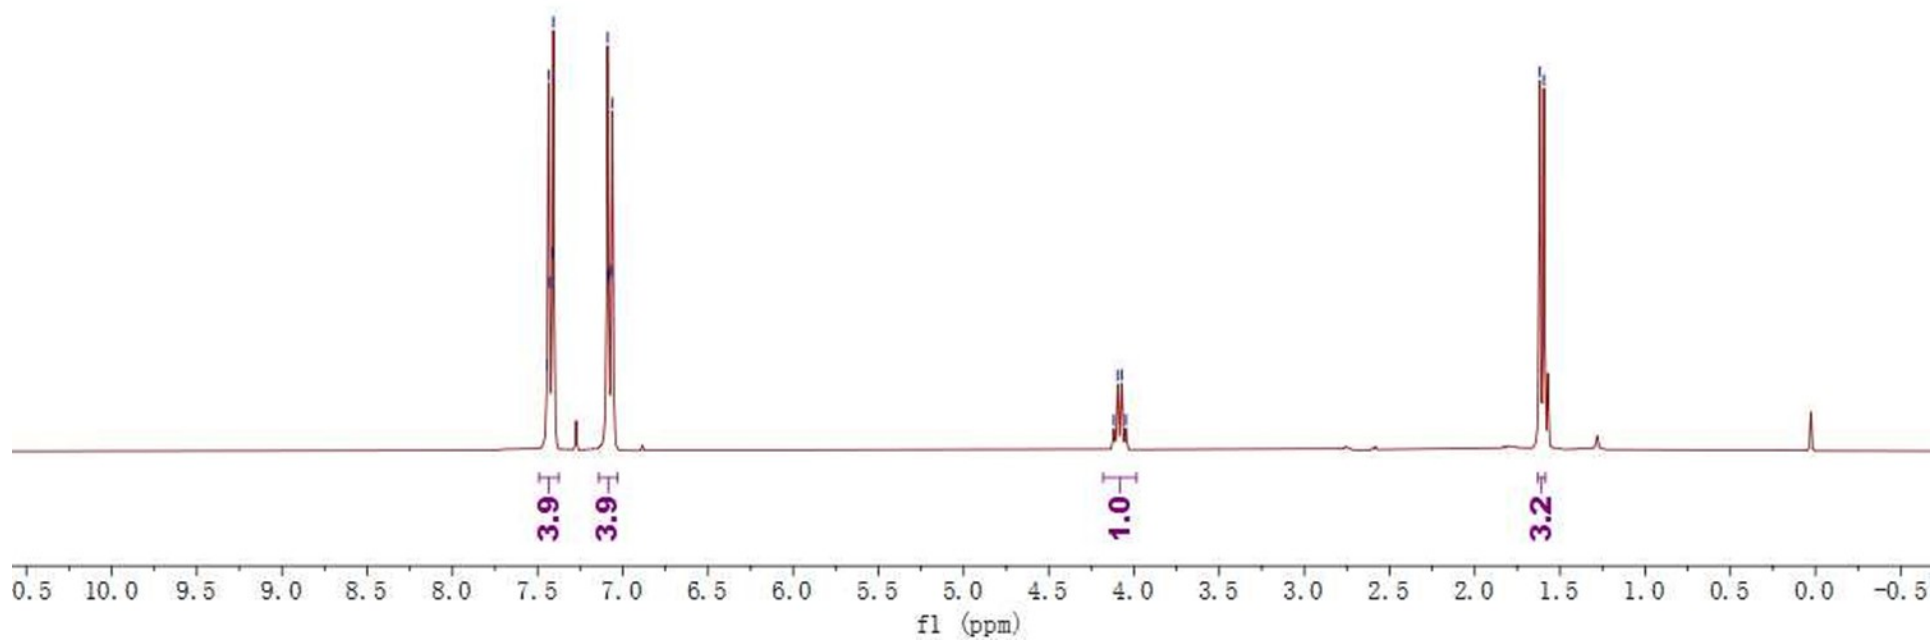

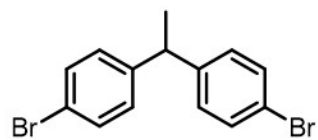

<sup>13</sup>C NMR

**3g**

—144.8

~131.6  
~129.3

—120.1

—43.7

—21.7

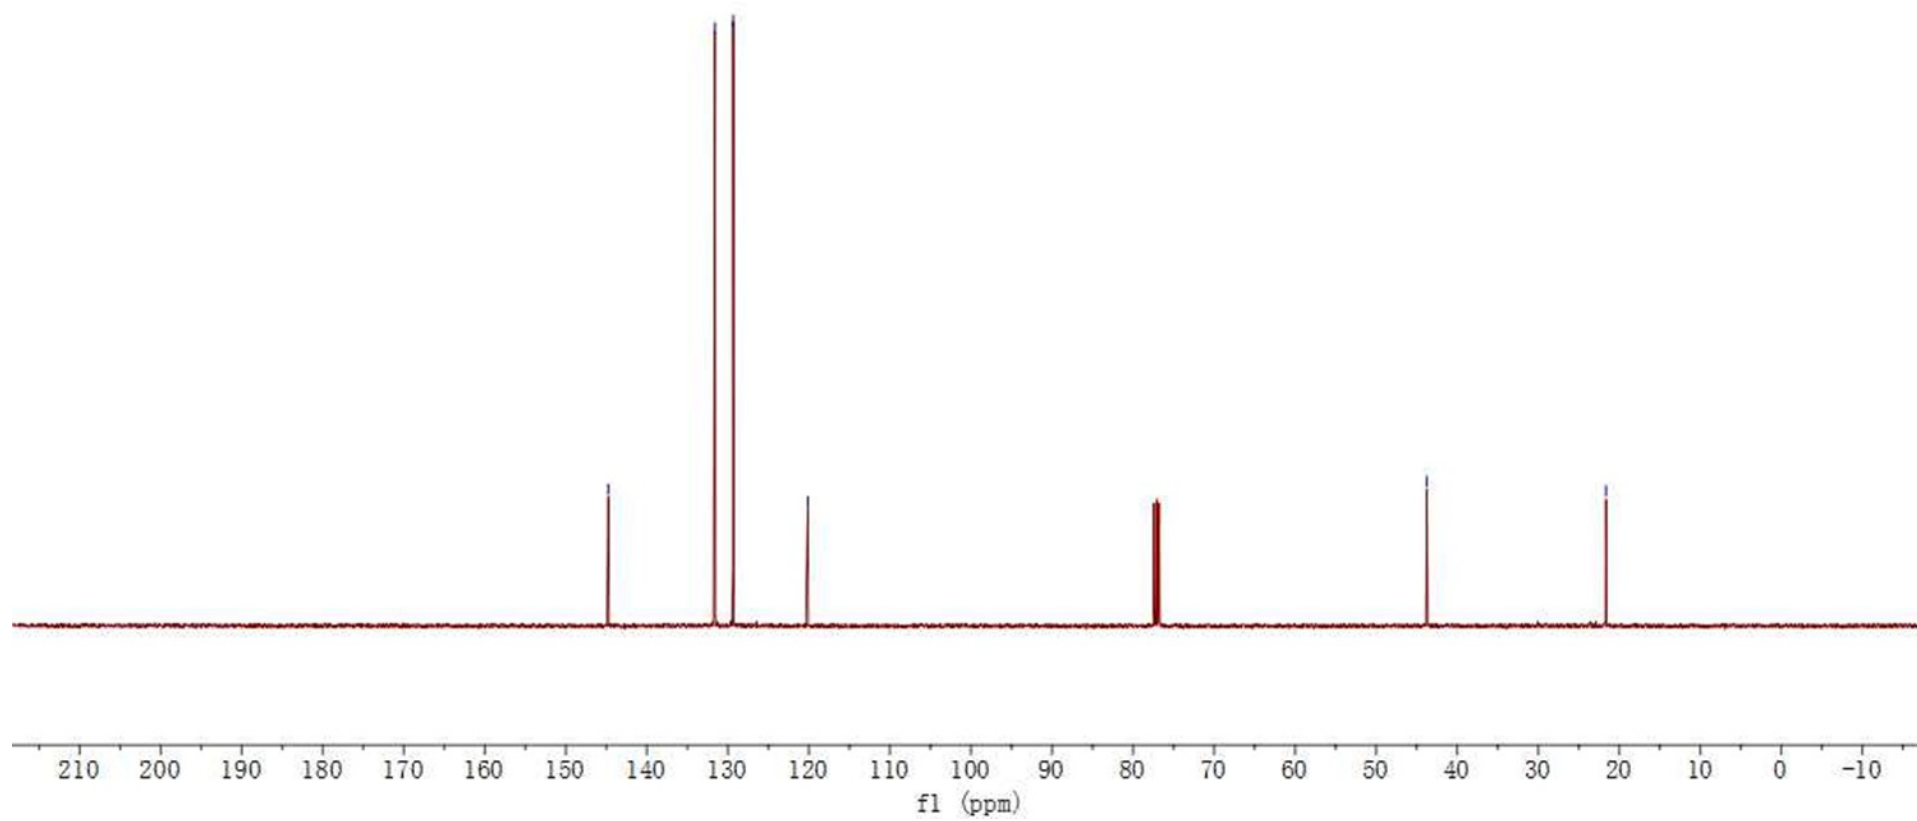



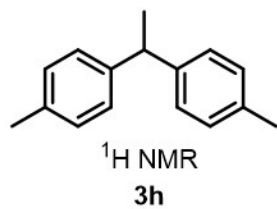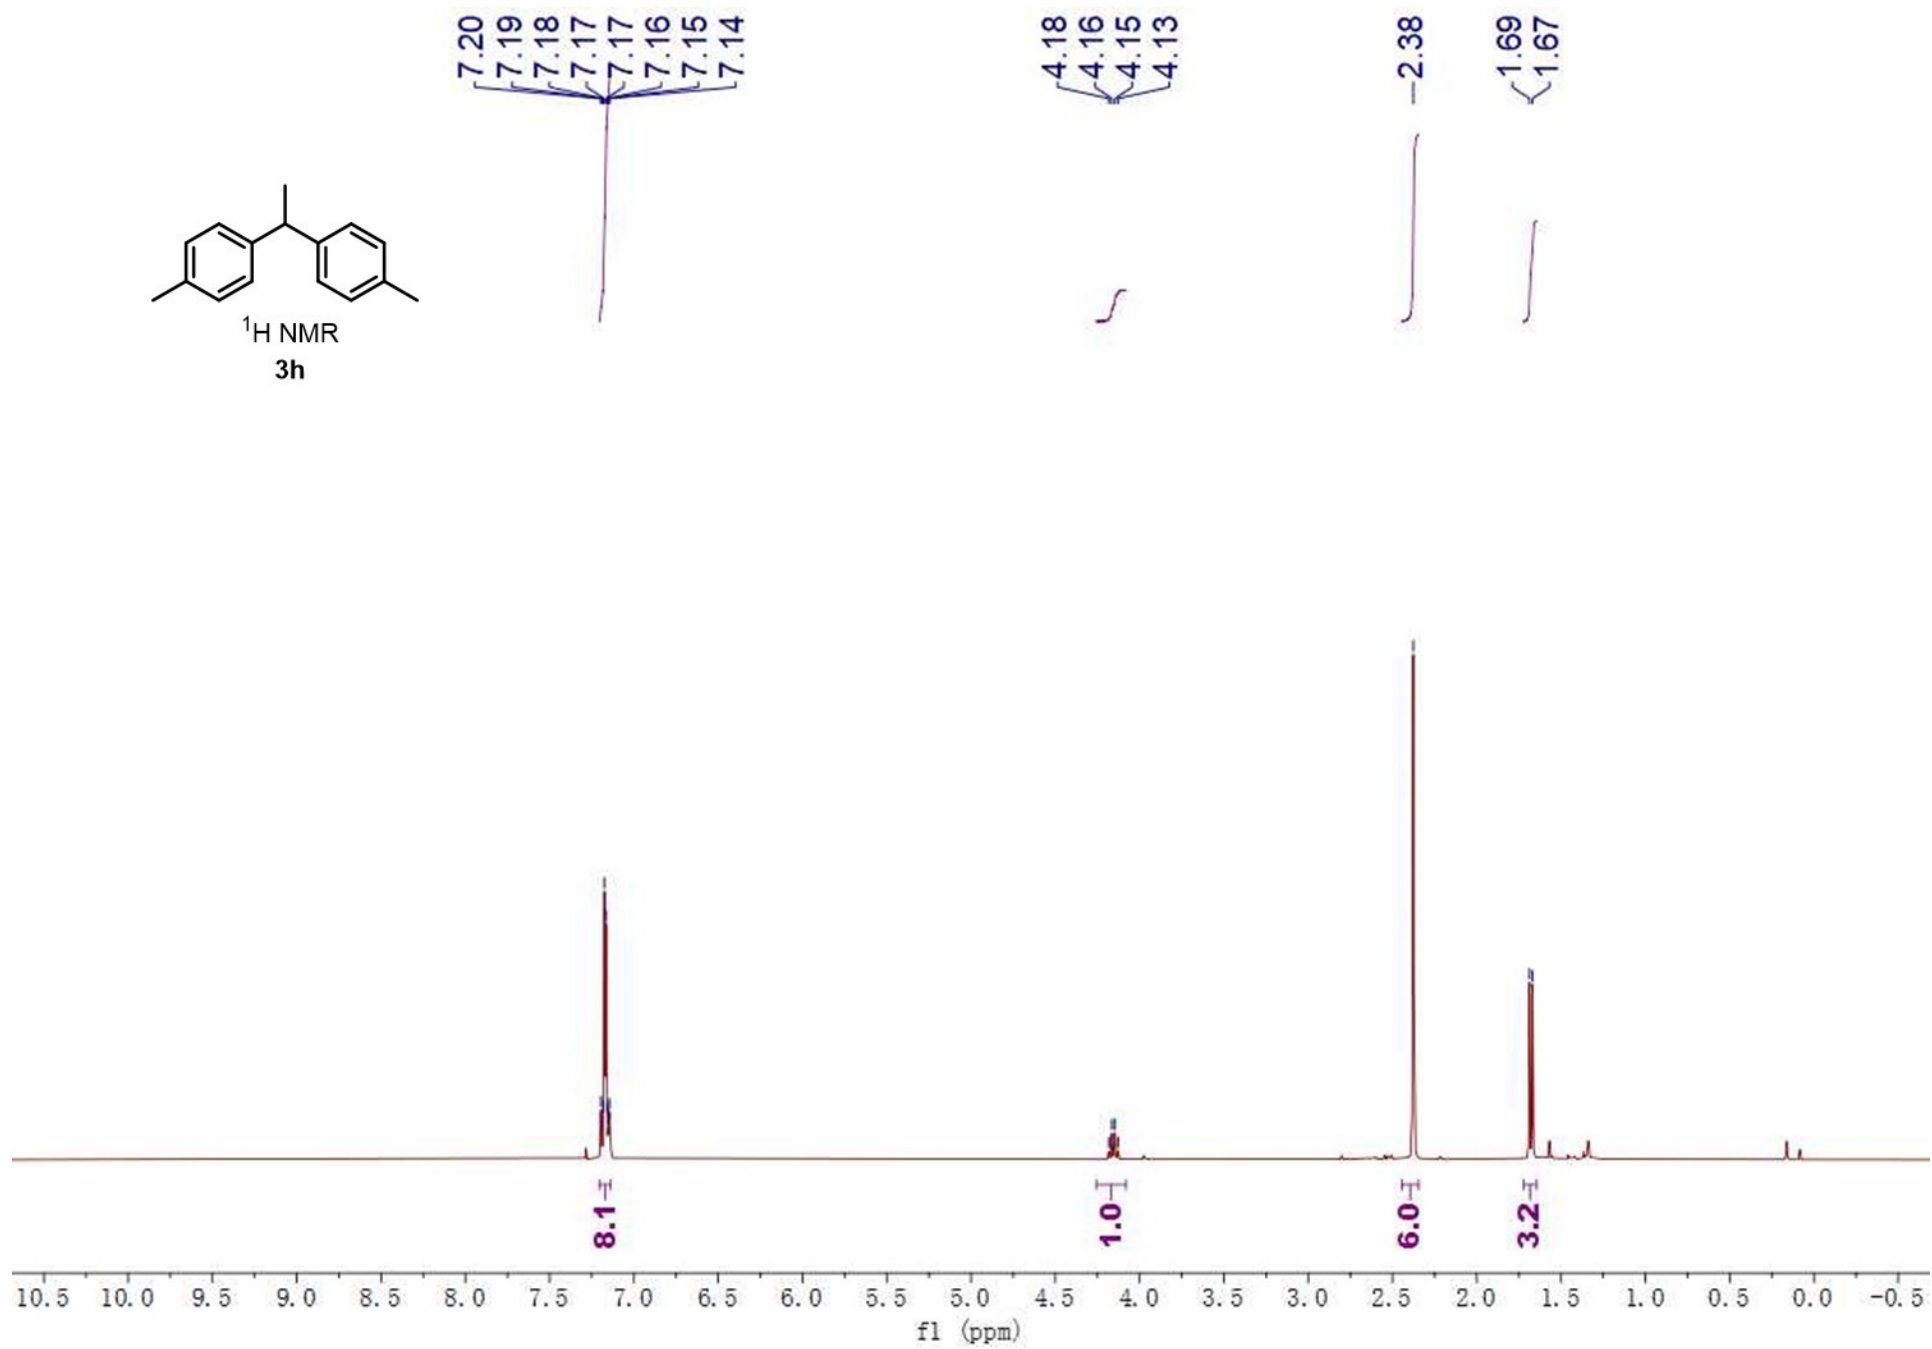



—143.5  
—135.3  
—128.9  
—127.3

—43.8

—21.9  
—20.9

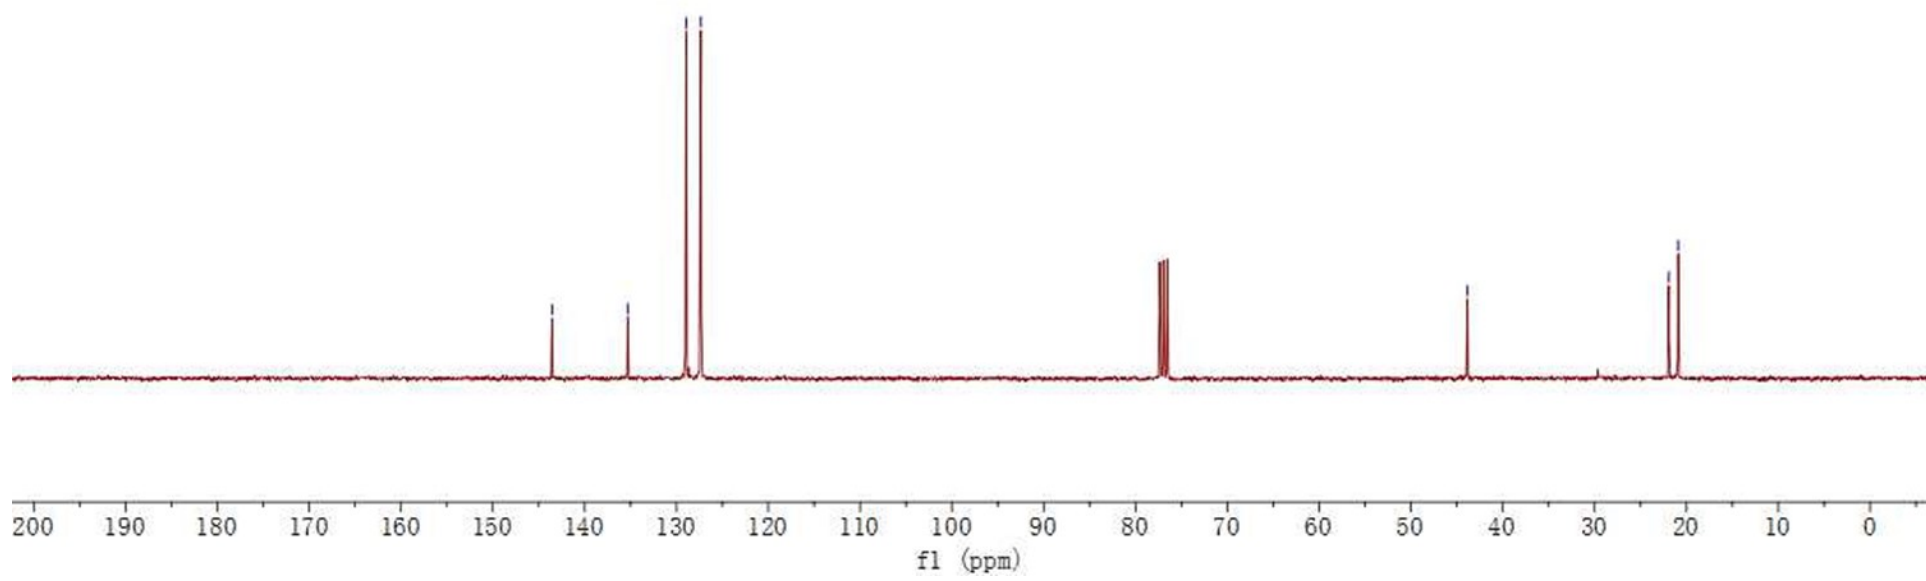

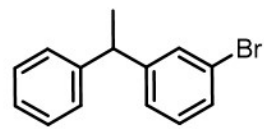

<sup>1</sup>H NMR  
3i

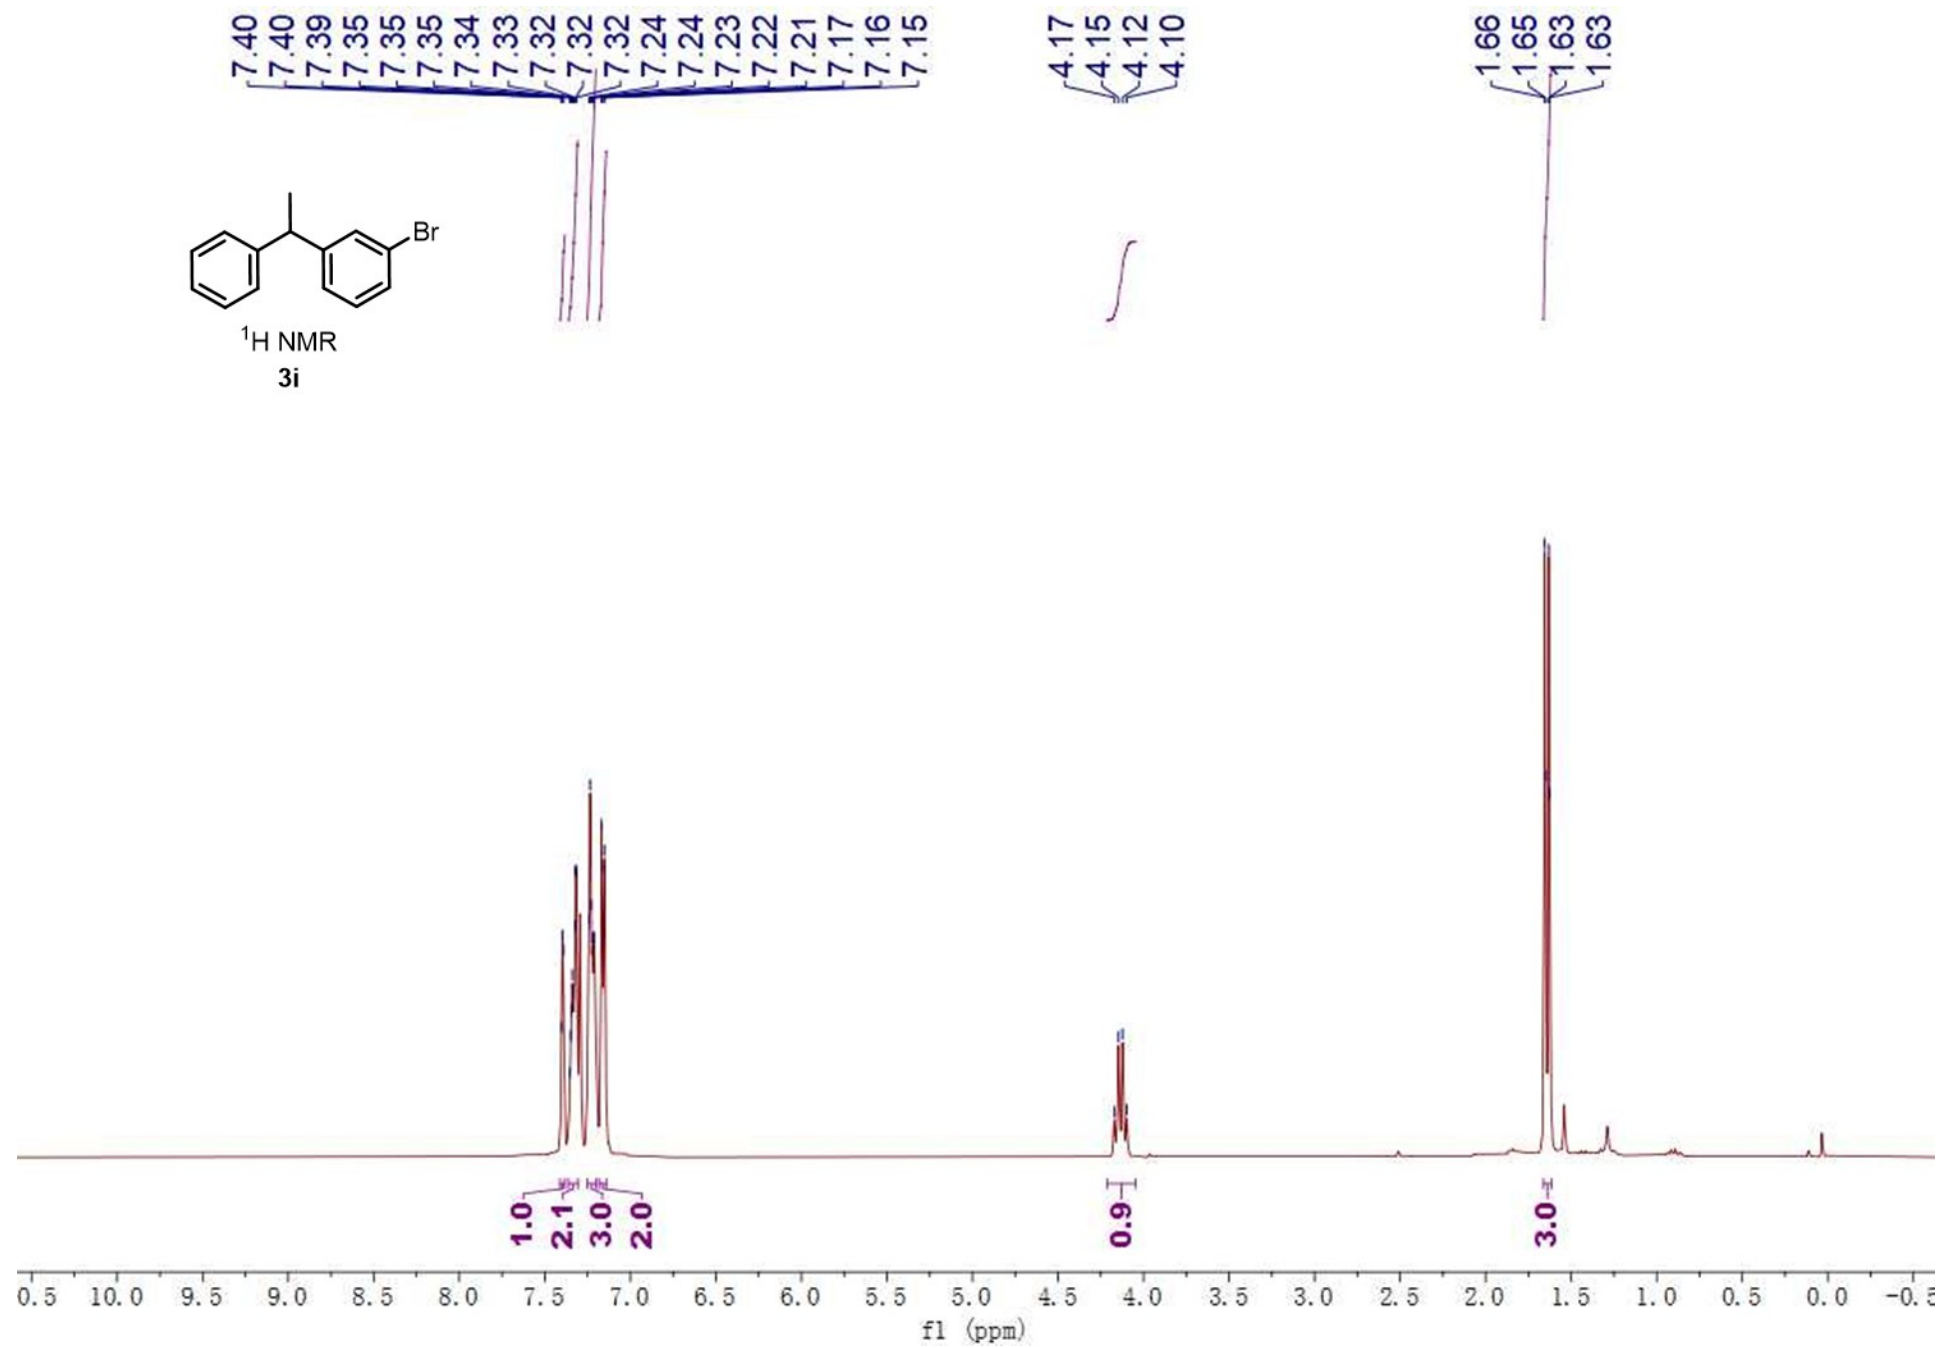

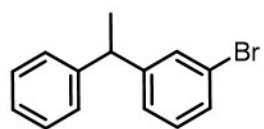

<sup>13</sup>C NMR  
3i

148.8  
145.5  
130.7  
130.0  
129.2  
128.6  
127.6  
126.4  
126.4  
122.6

-44.6

-21.7

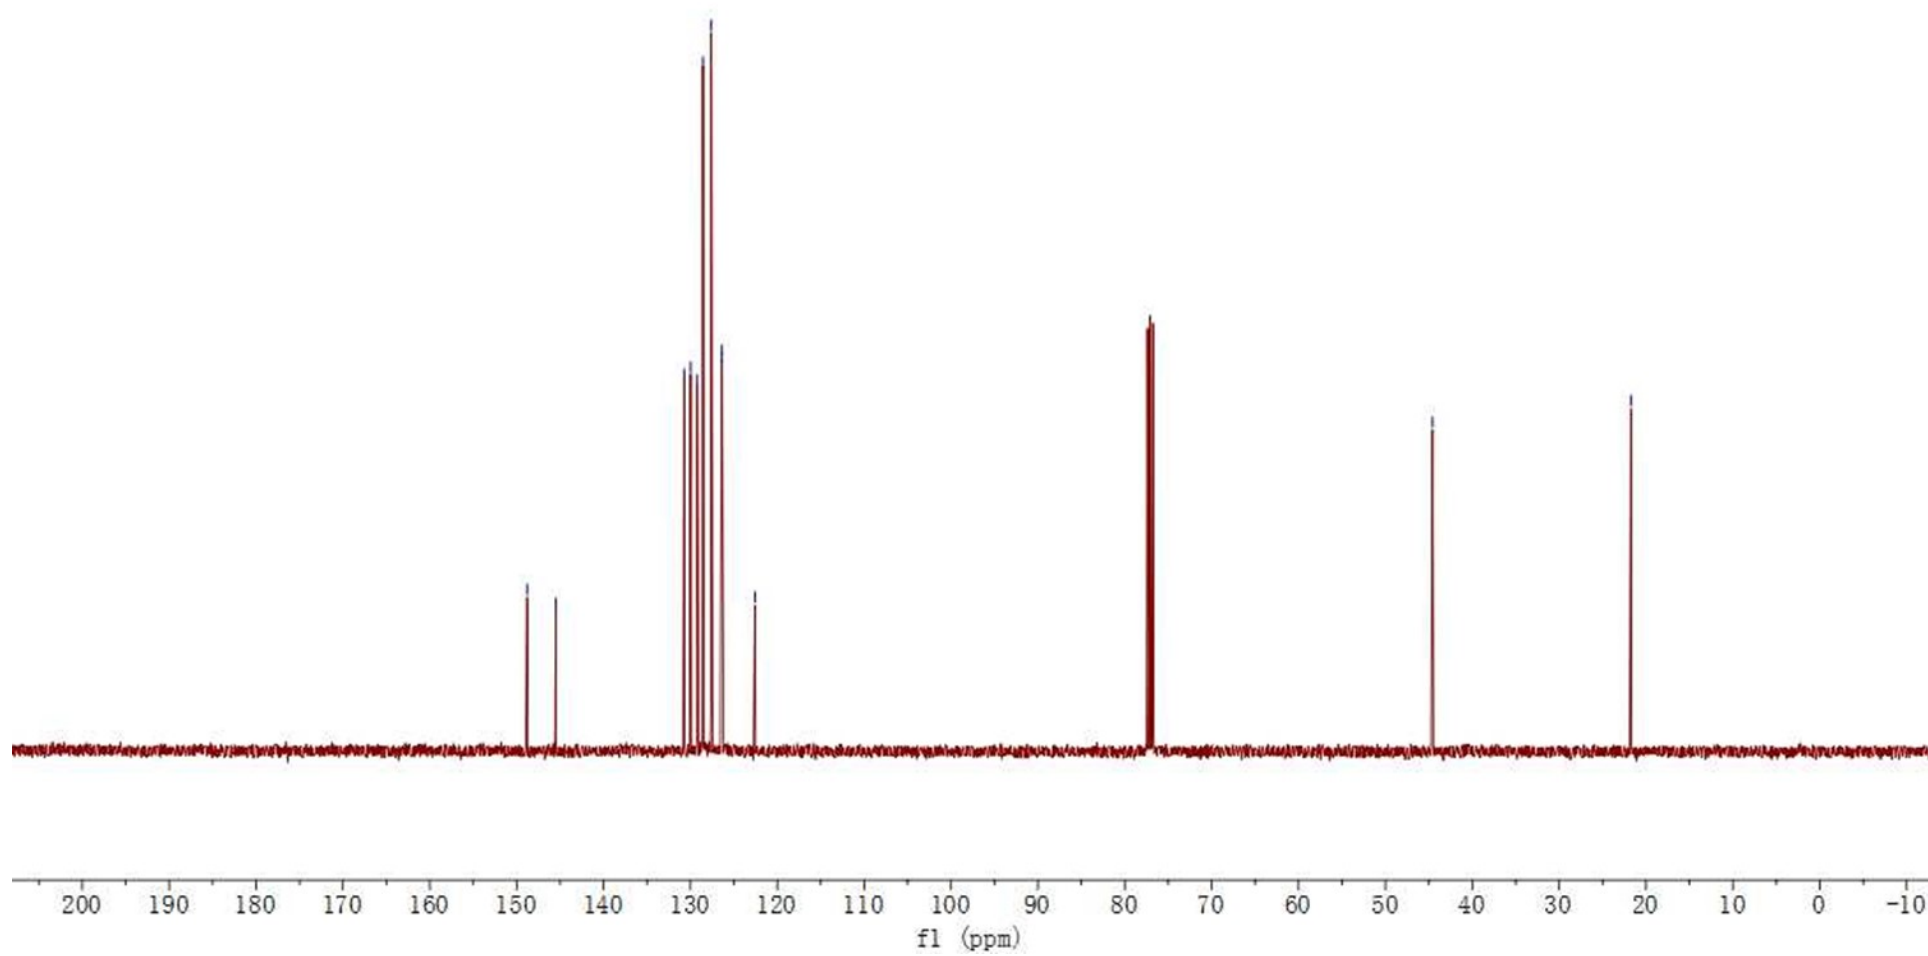

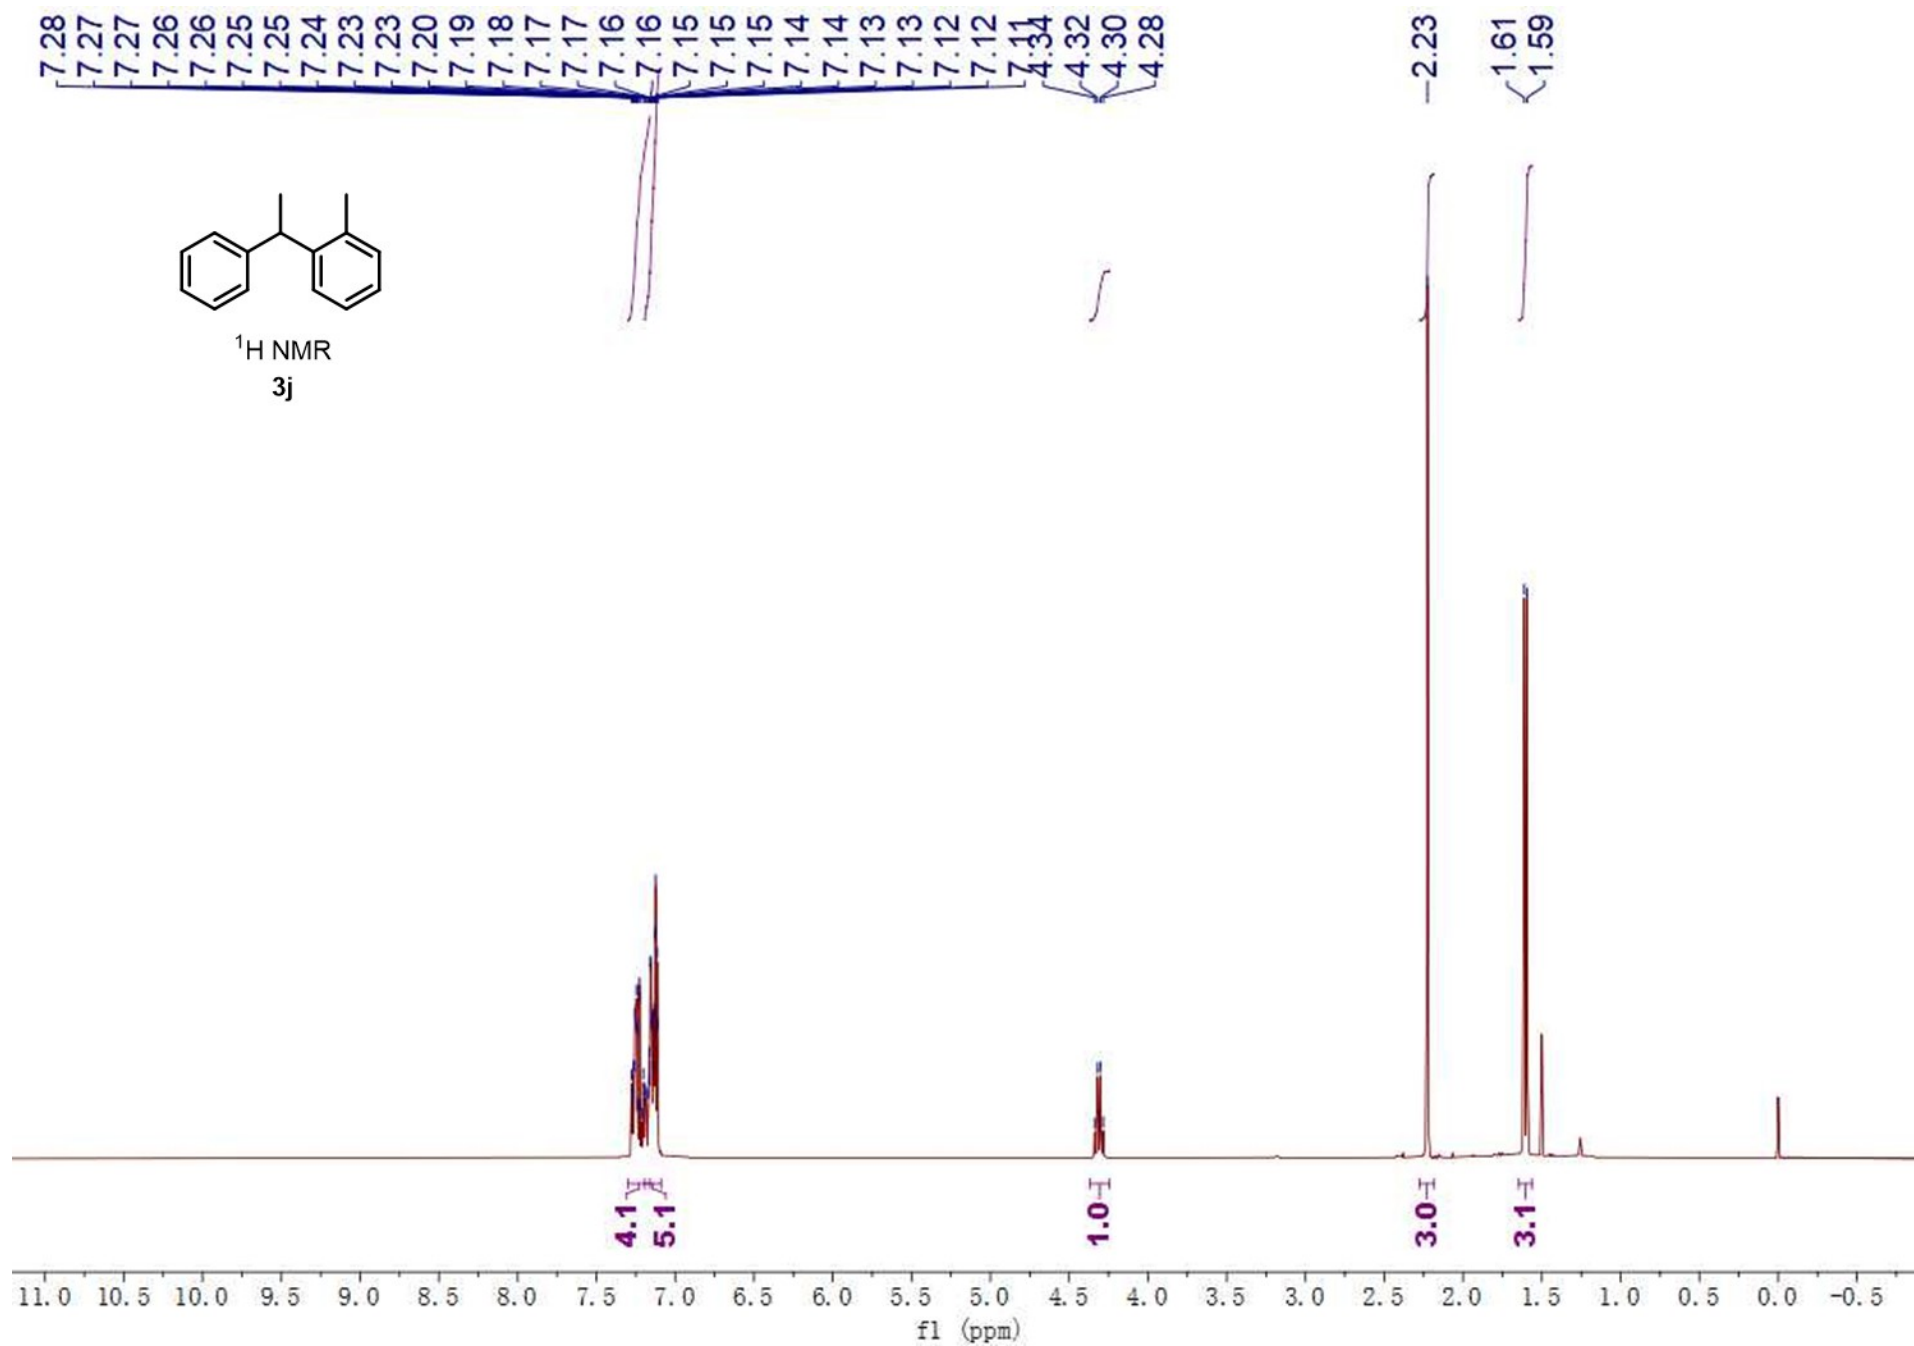

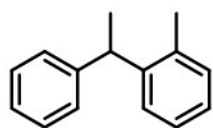

<sup>13</sup>C NMR  
3j

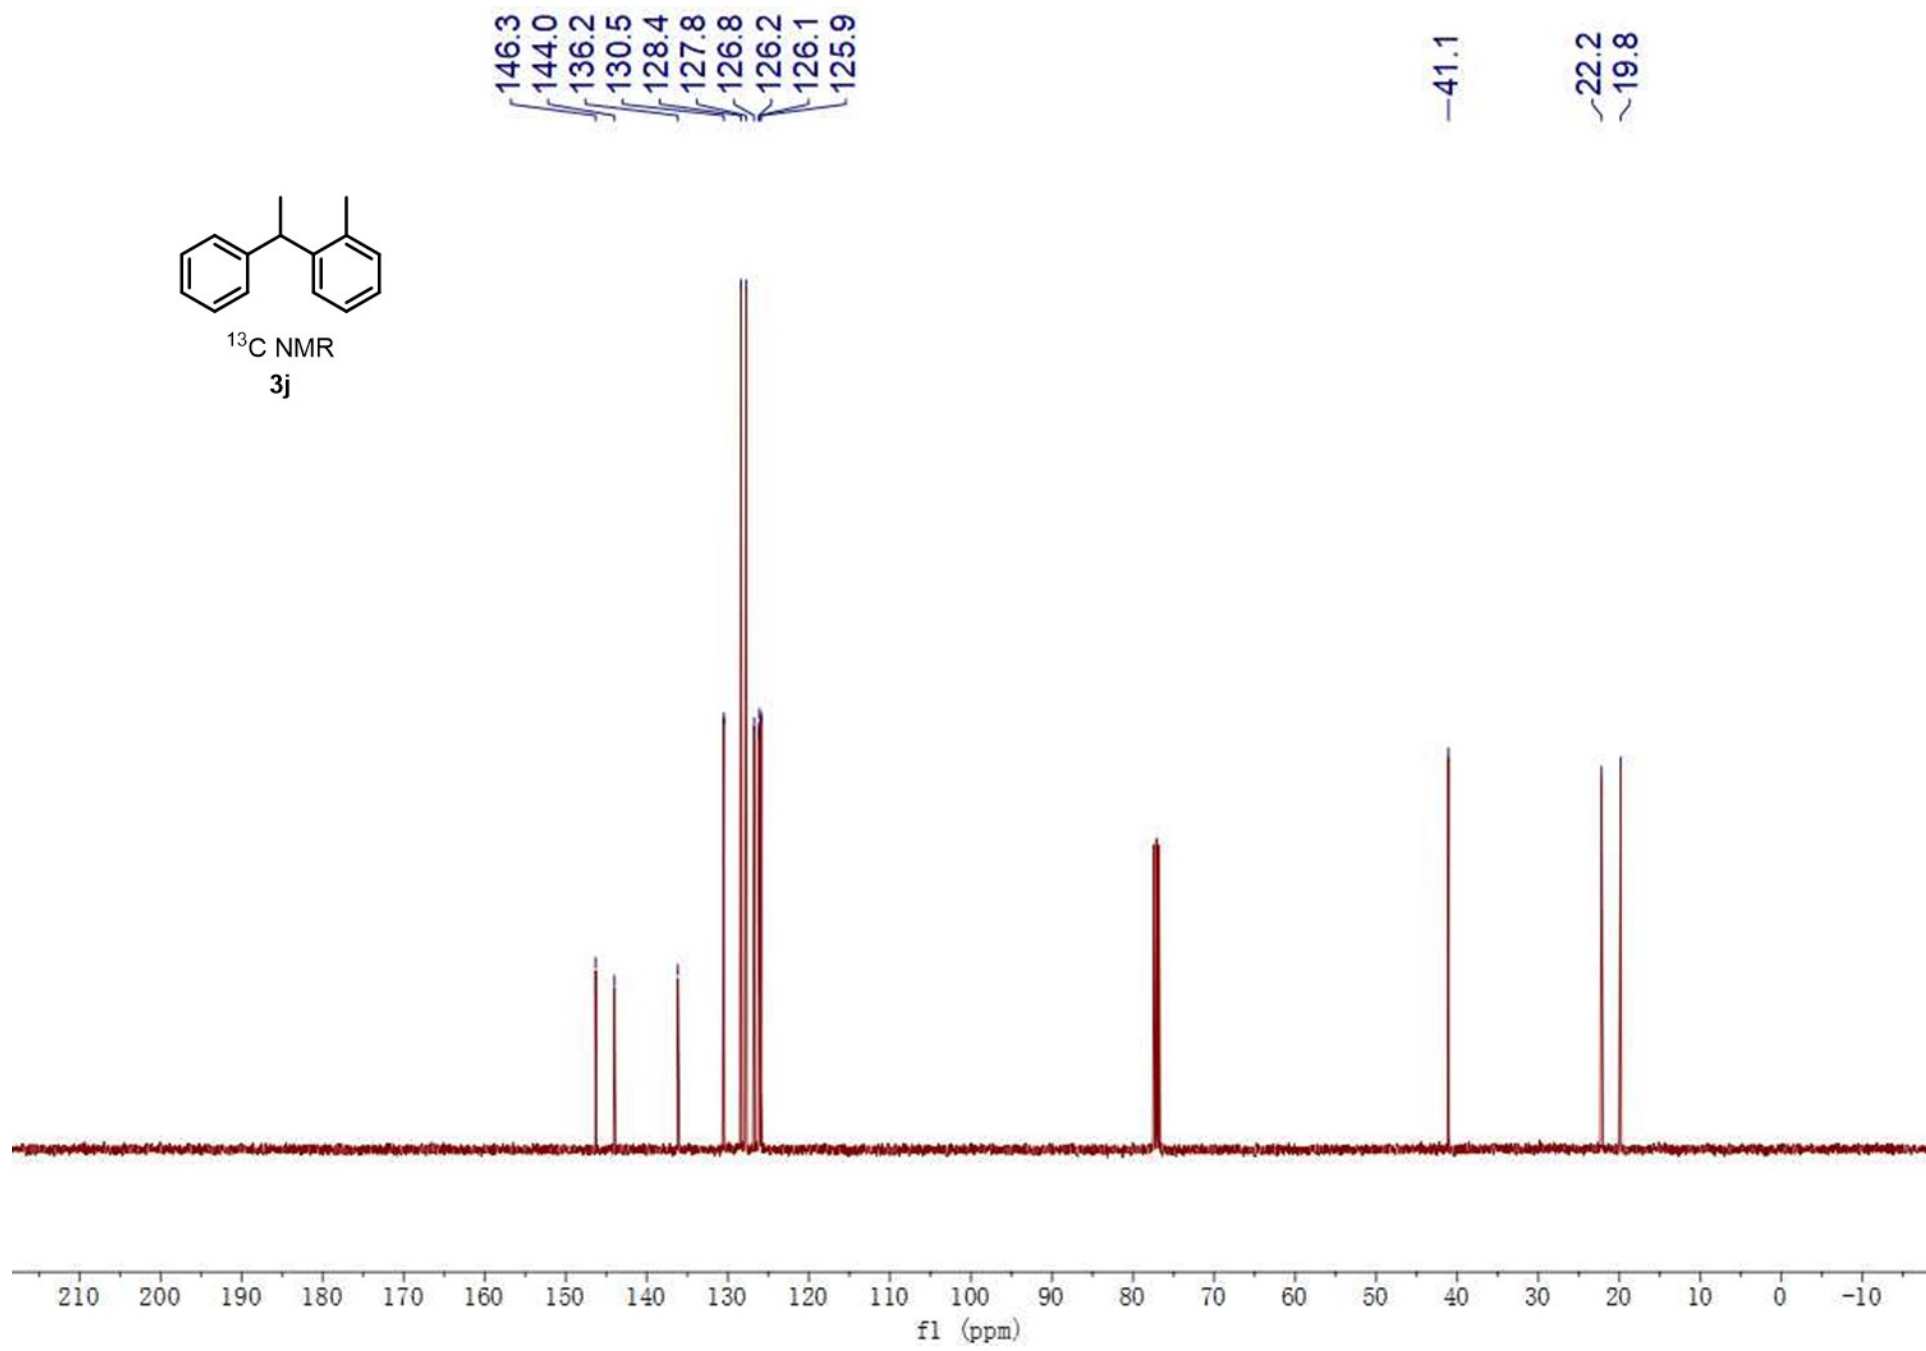

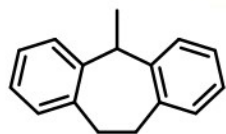

<sup>1</sup>H NMR  
3k

7.23  
7.22  
7.21  
7.20  
7.15  
7.14  
7.13  
7.12  
7.12  
7.11  
7.10  
7.09  
7.09  
7.08  
7.08  
7.07

4.46  
4.43  
4.41  
4.39

3.20

1.72  
1.69

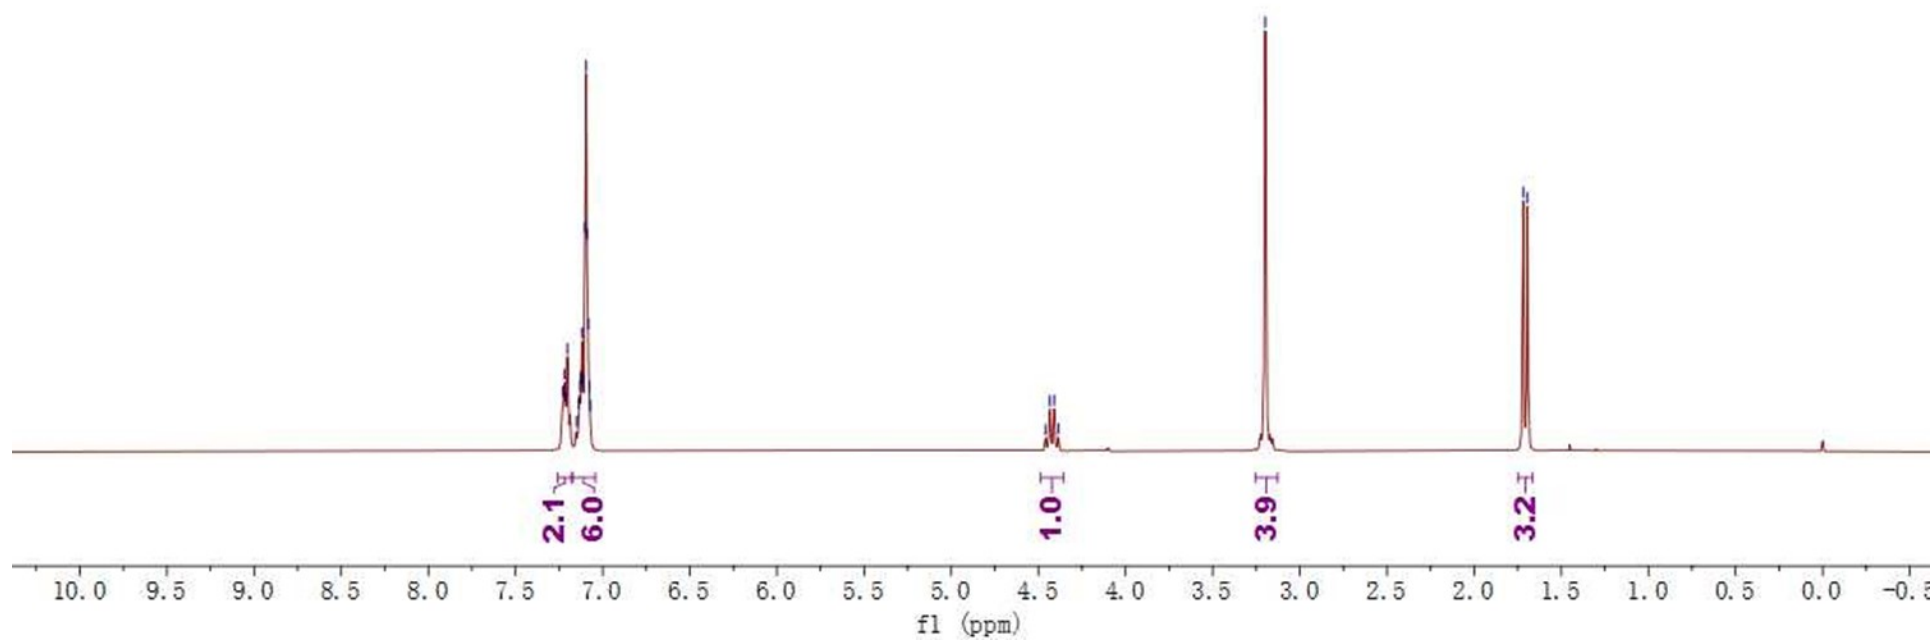

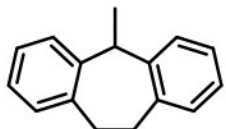

<sup>13</sup>C NMR  
3k

143.3  
139.3  
130.1  
127.5  
126.4  
126.2

43.7  
33.3  
22.1

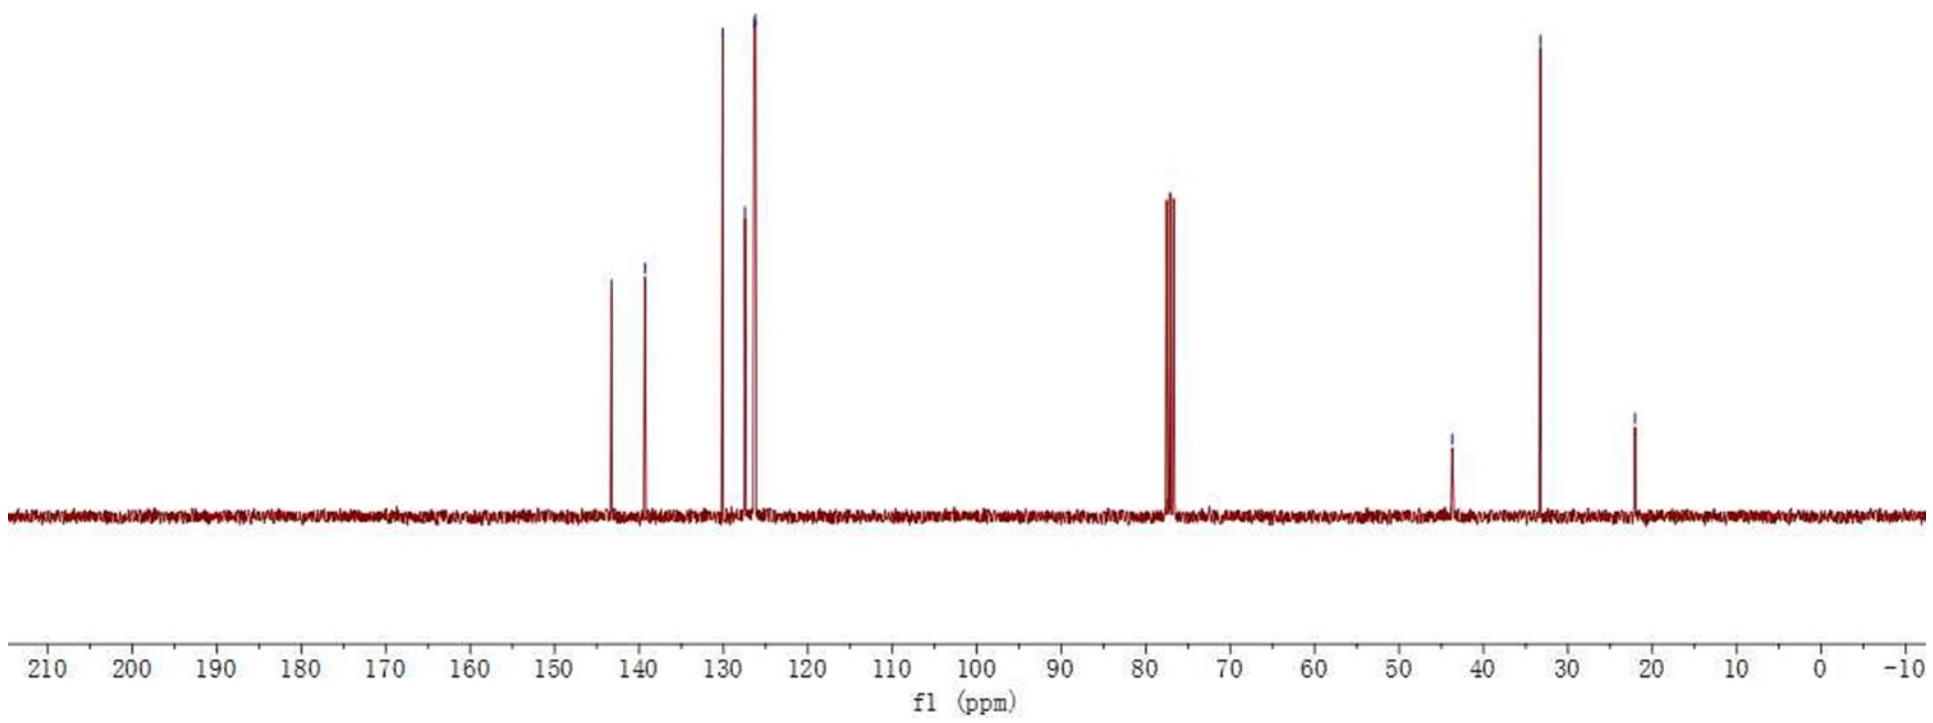



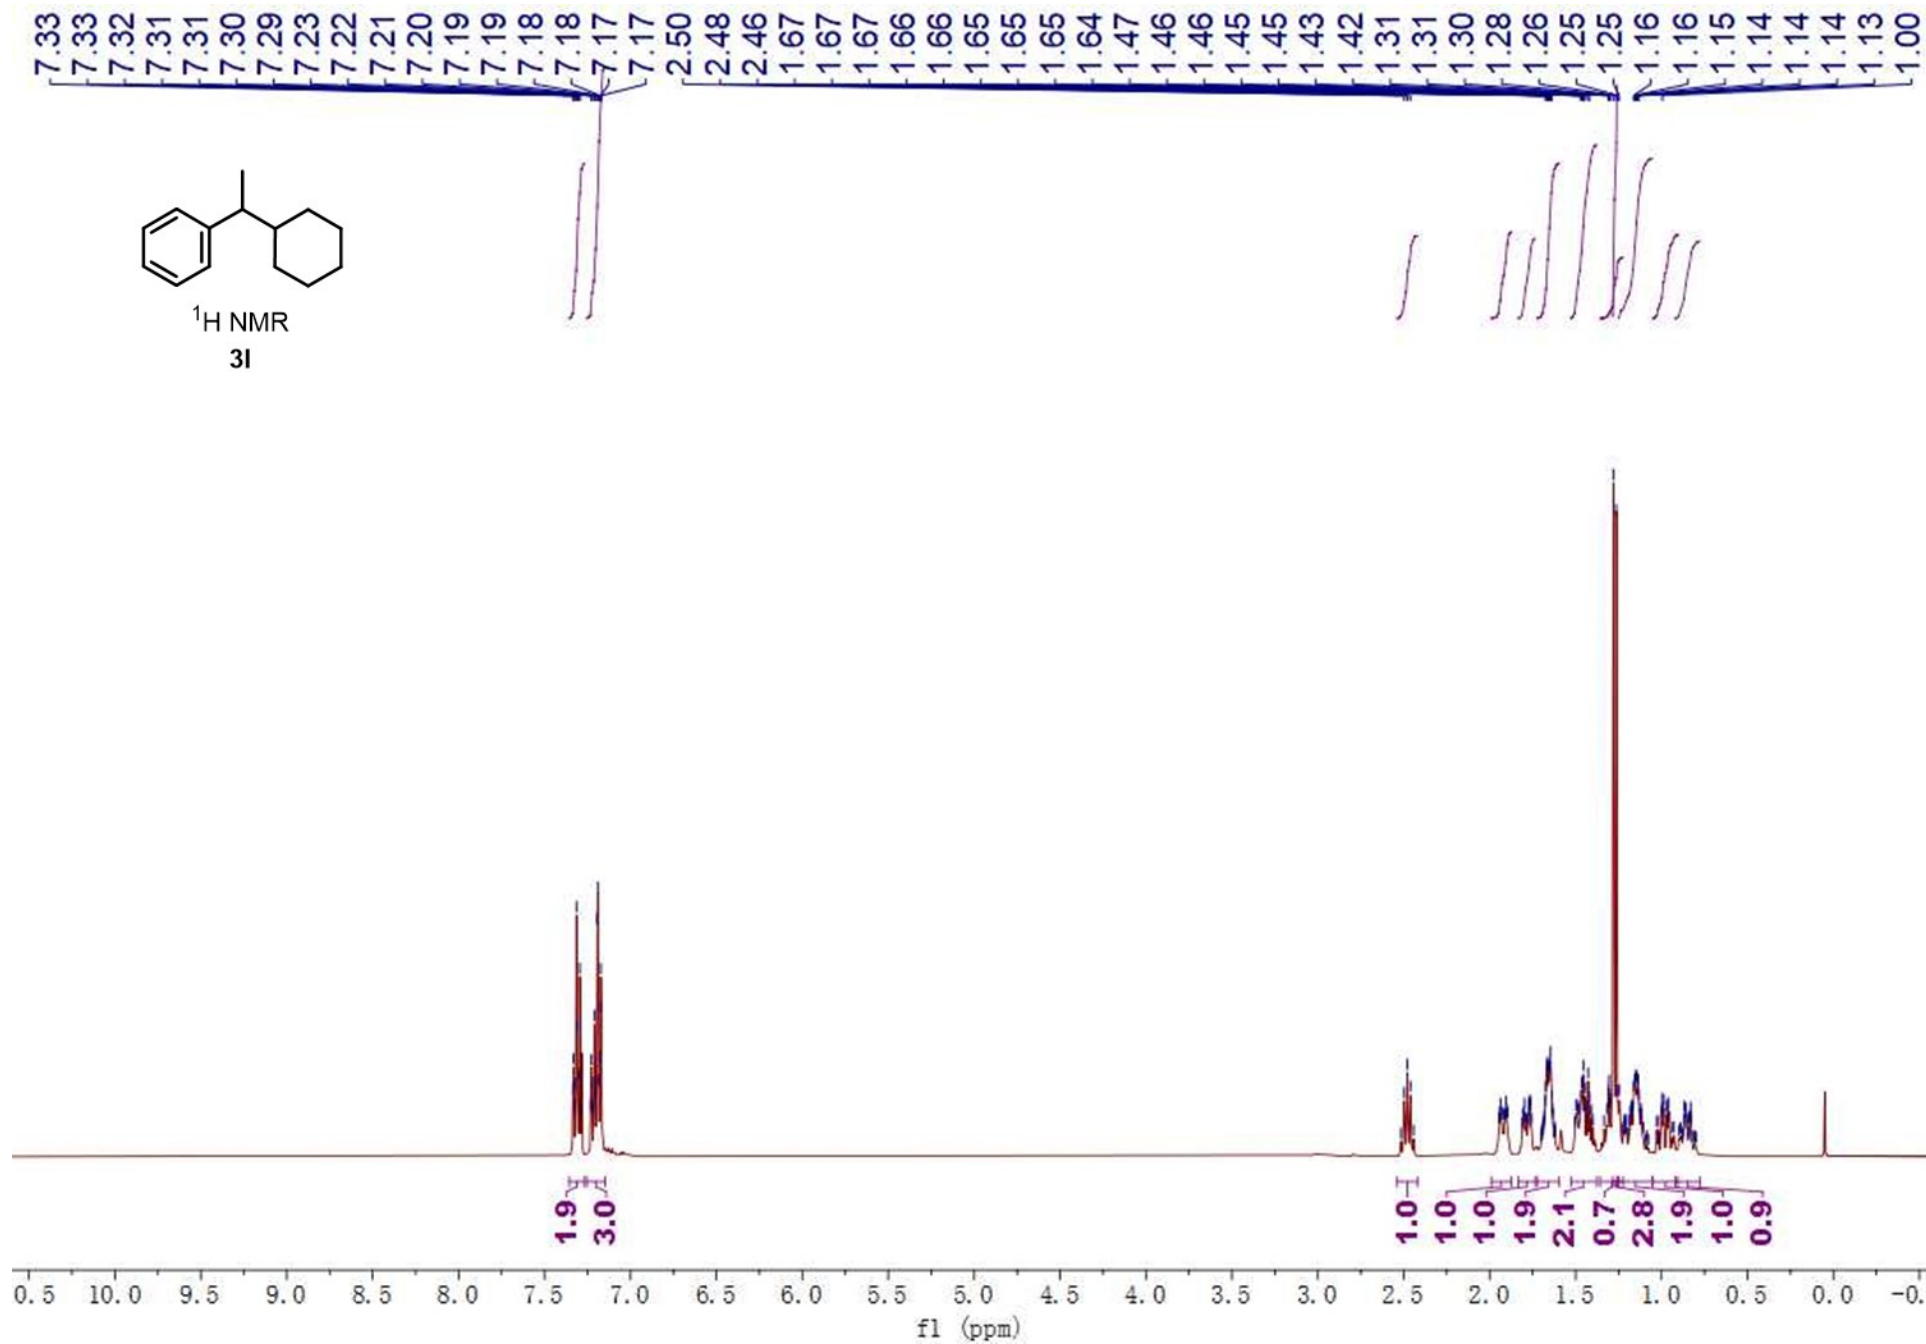

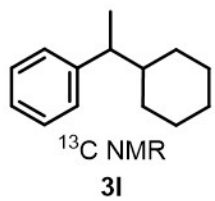

-147.2

128.0  
127.7  
125.7

46.0  
44.2

31.5  
30.7  
26.6  
26.6  
18.9

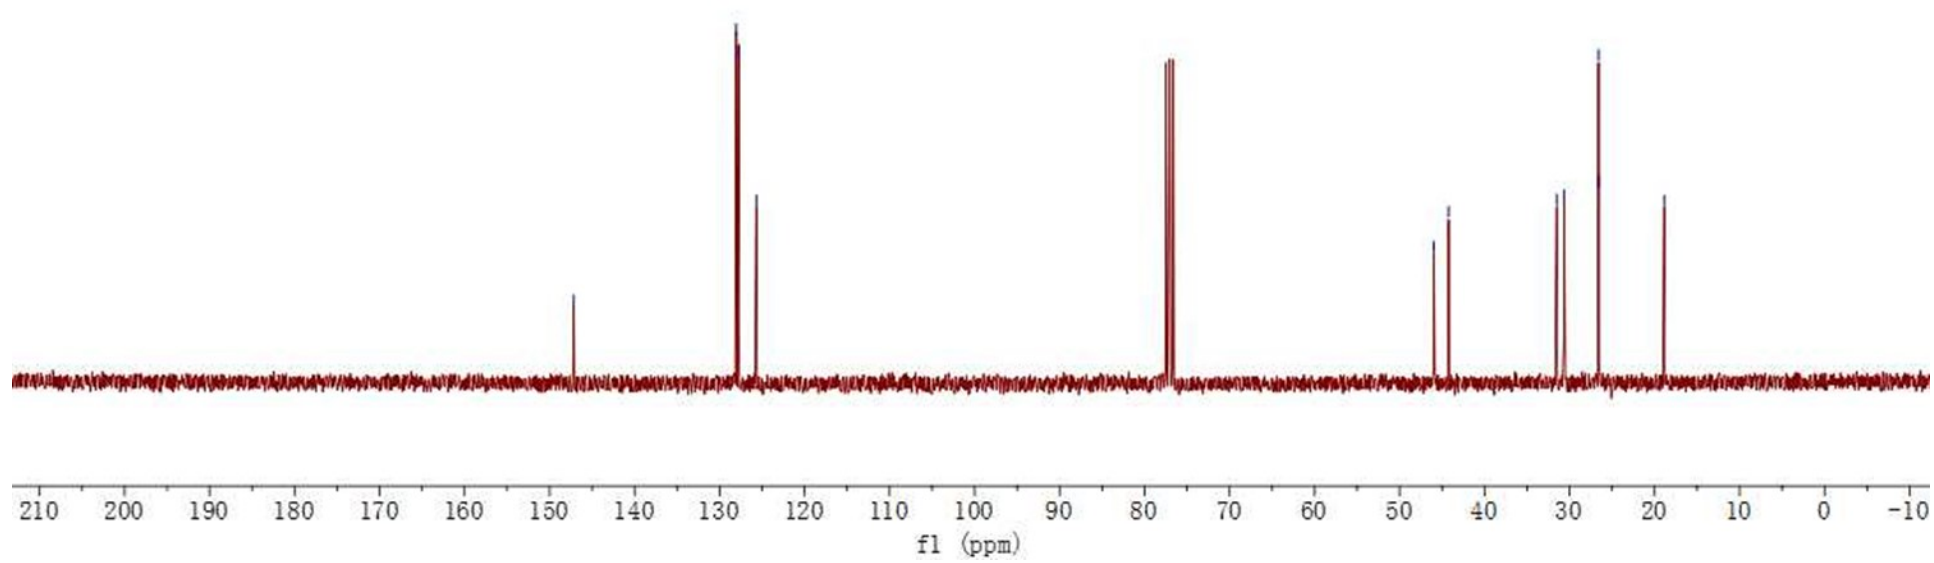

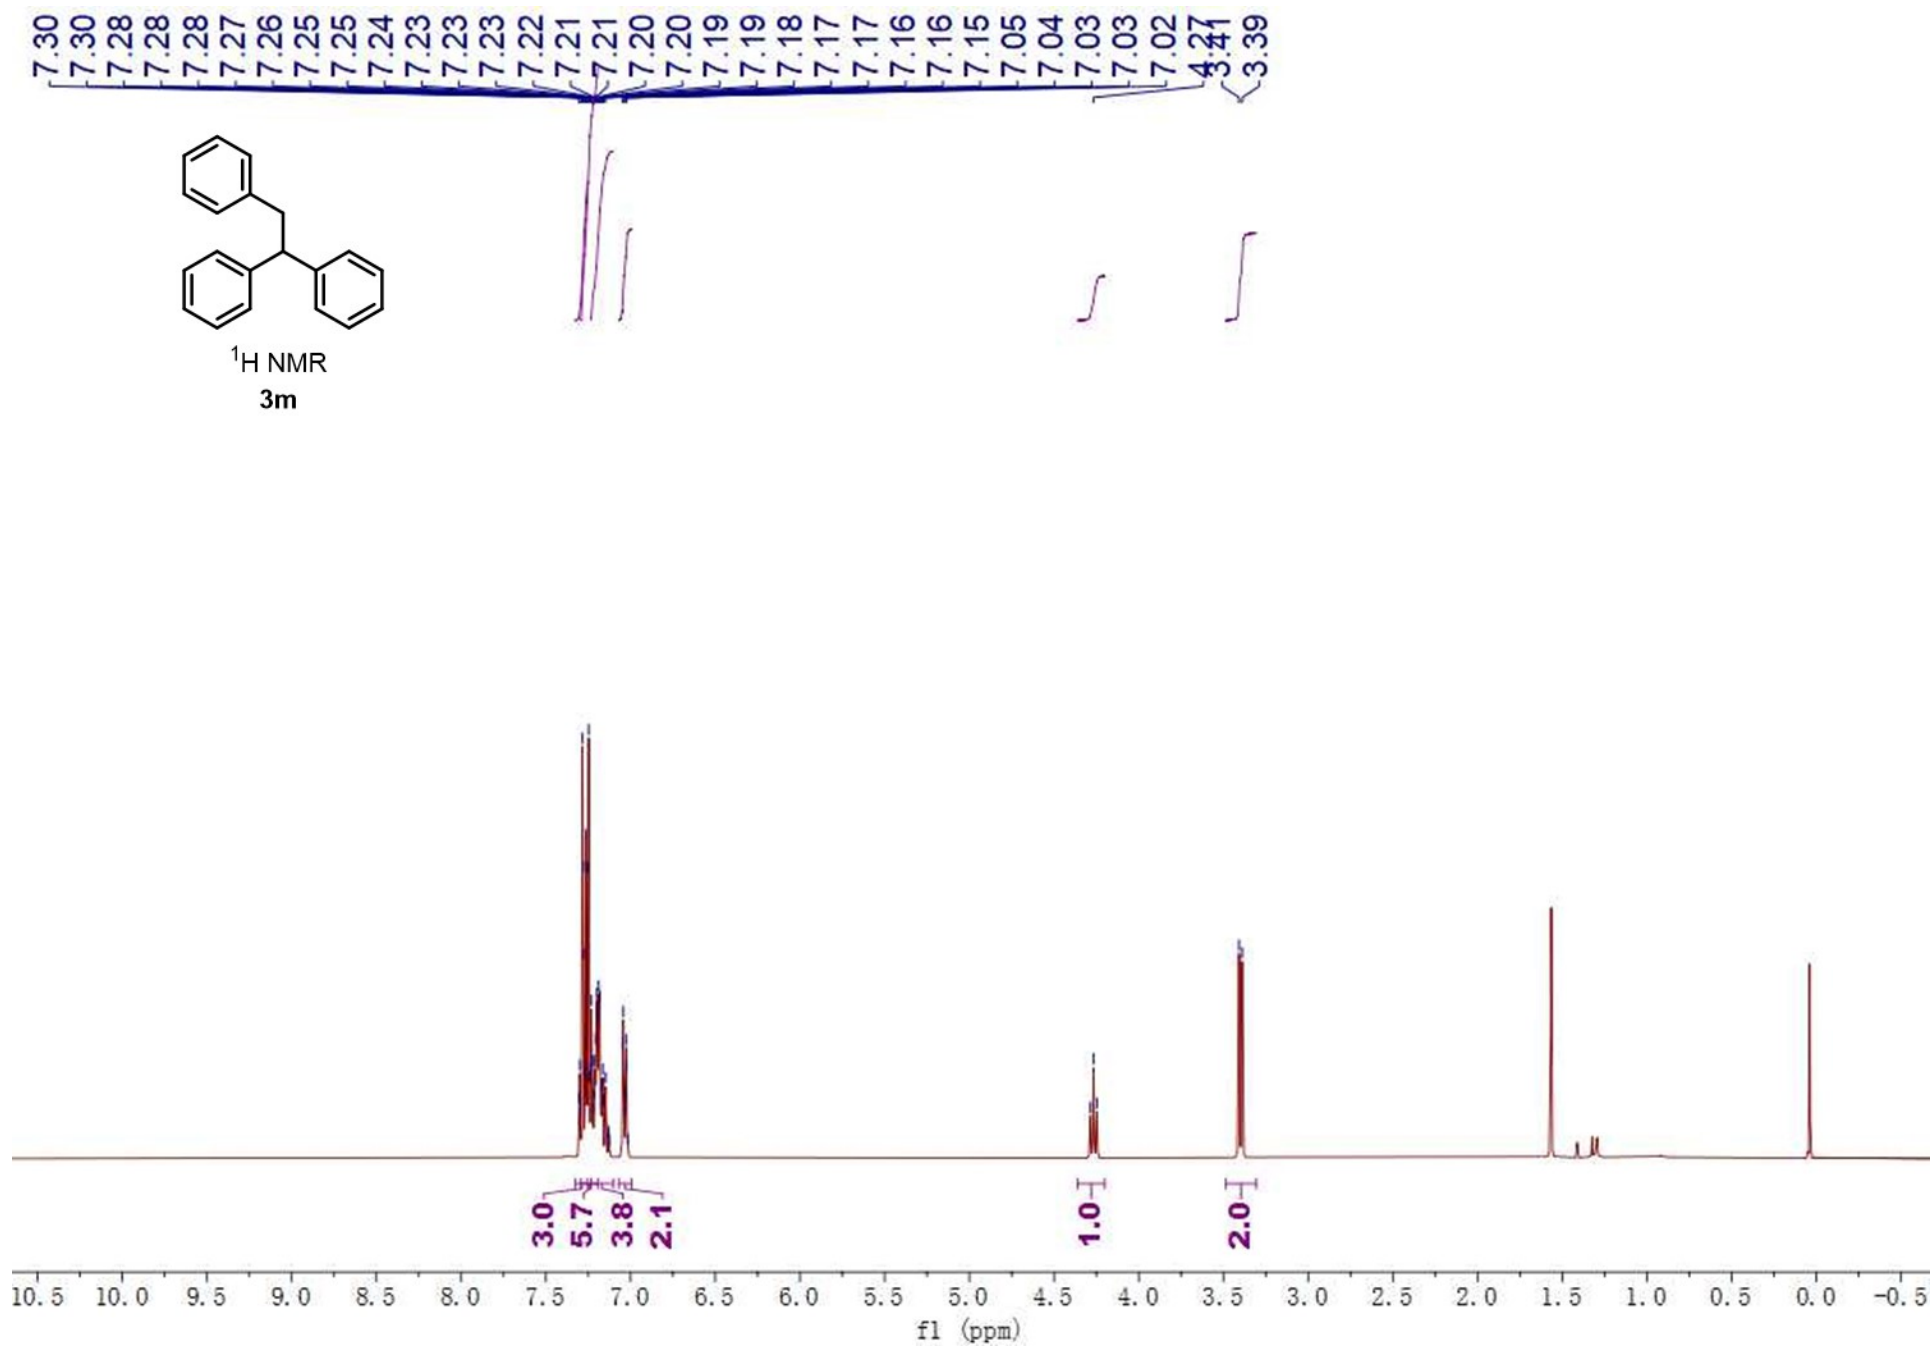

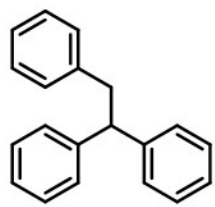

<sup>13</sup>C NMR  
3m

144.6  
140.4  
129.2  
128.4  
128.2  
126.5  
126.3  
126.0

53.2  
42.2

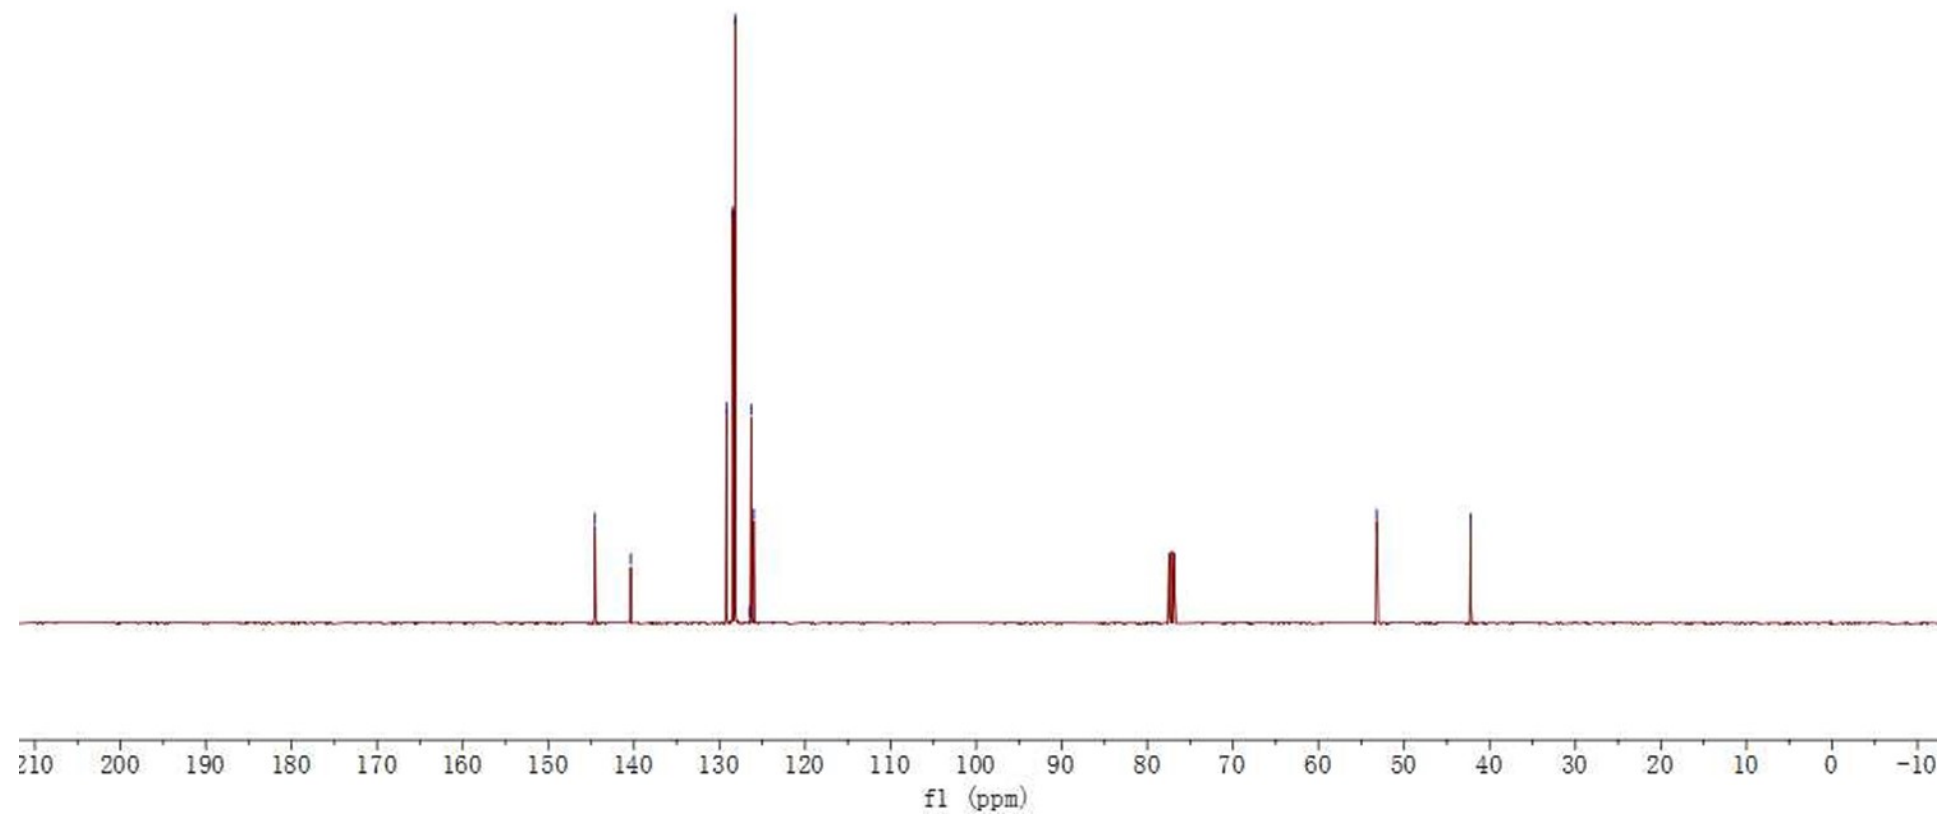

7.31  
7.31  
7.30  
7.29  
7.28  
7.26  
7.25  
7.24  
7.22  
7.22  
7.21  
7.20  
7.20  
7.19  
7.18  
7.17  
7.16  
7.16  
7.15  
7.14

3.94  
3.91  
3.88  
3.20  
3.18  
3.15  
2.20  
2.18  
2.18  
2.17  
2.15  
2.14  
2.12  
1.83  
1.80  
1.79  
1.78  
1.75  
1.73

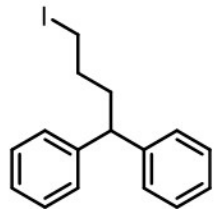

<sup>1</sup>H NMR  
3n

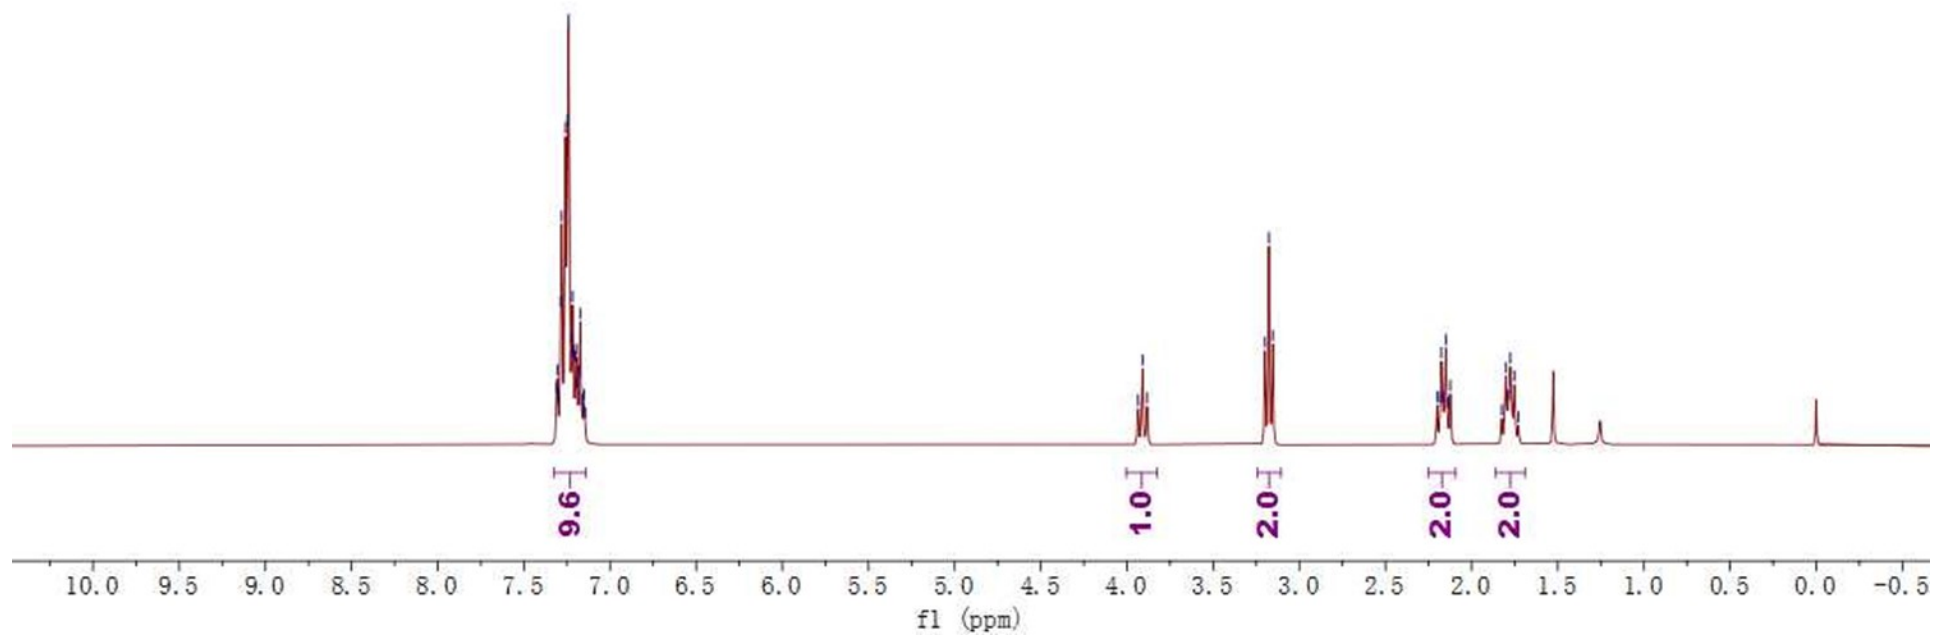

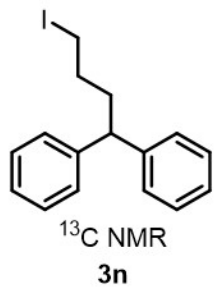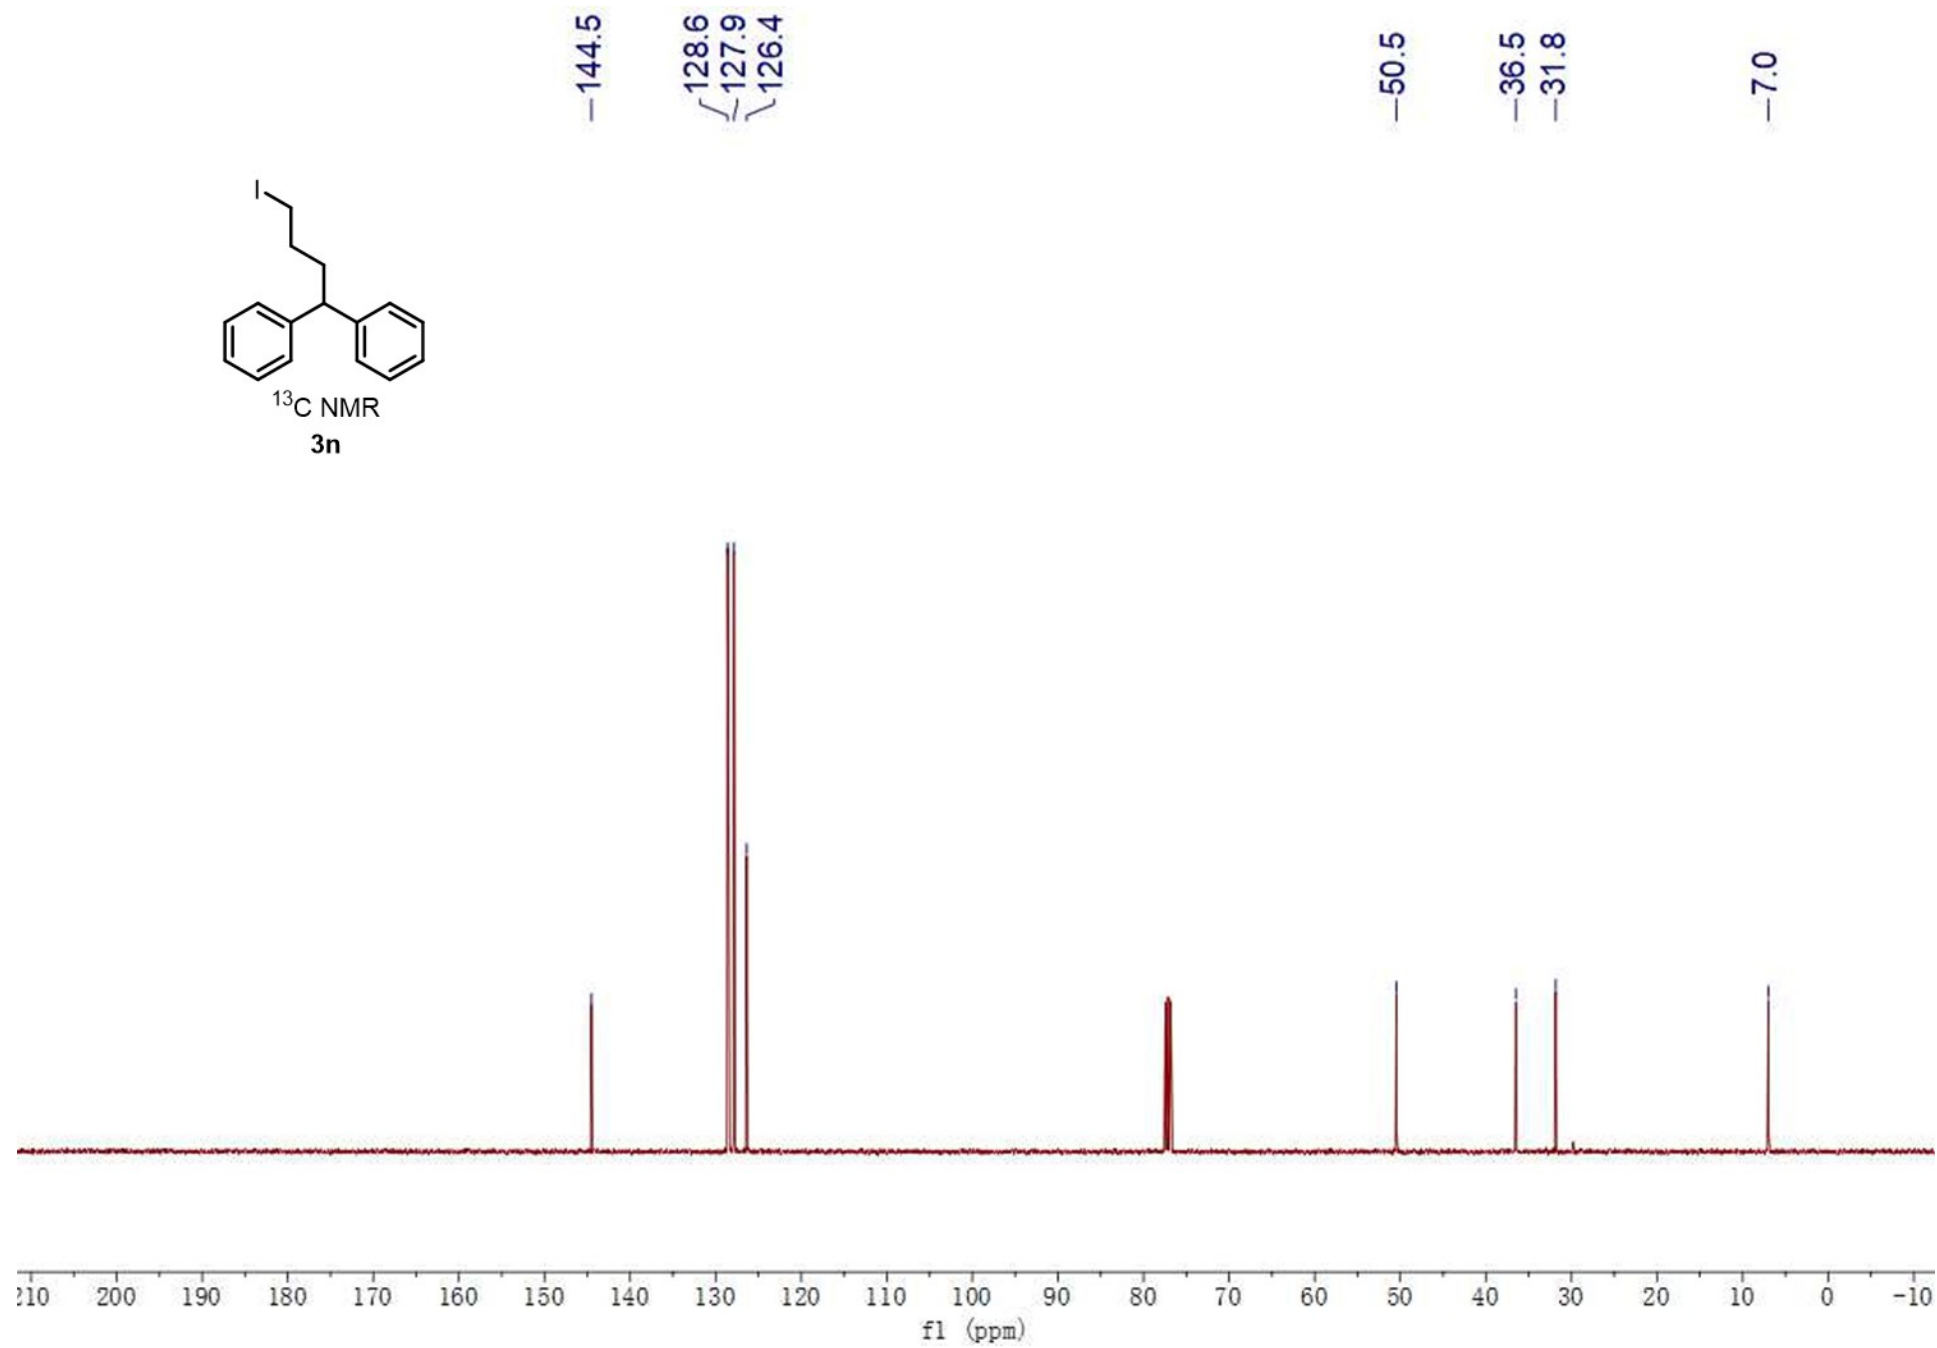

7.30  
7.29  
7.29  
7.27  
7.27  
7.26  
7.25  
7.24  
7.22  
7.22  
7.22  
7.18  
7.17  
7.16  
7.16  
7.15  
7.15  
7.14  
7.13  
7.12  
3.93  
3.90  
3.88  
2.06  
2.05  
2.04  
2.03  
2.02  
2.01  
2.01  
2.00  
1.98  
1.34  
1.33  
1.32  
1.32  
1.31  
1.30  
1.29  
1.28  
1.27  
1.26  
1.26  
1.25  
1.24  
1.22  
0.94  
0.92  
0.89  
0.88

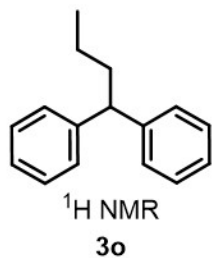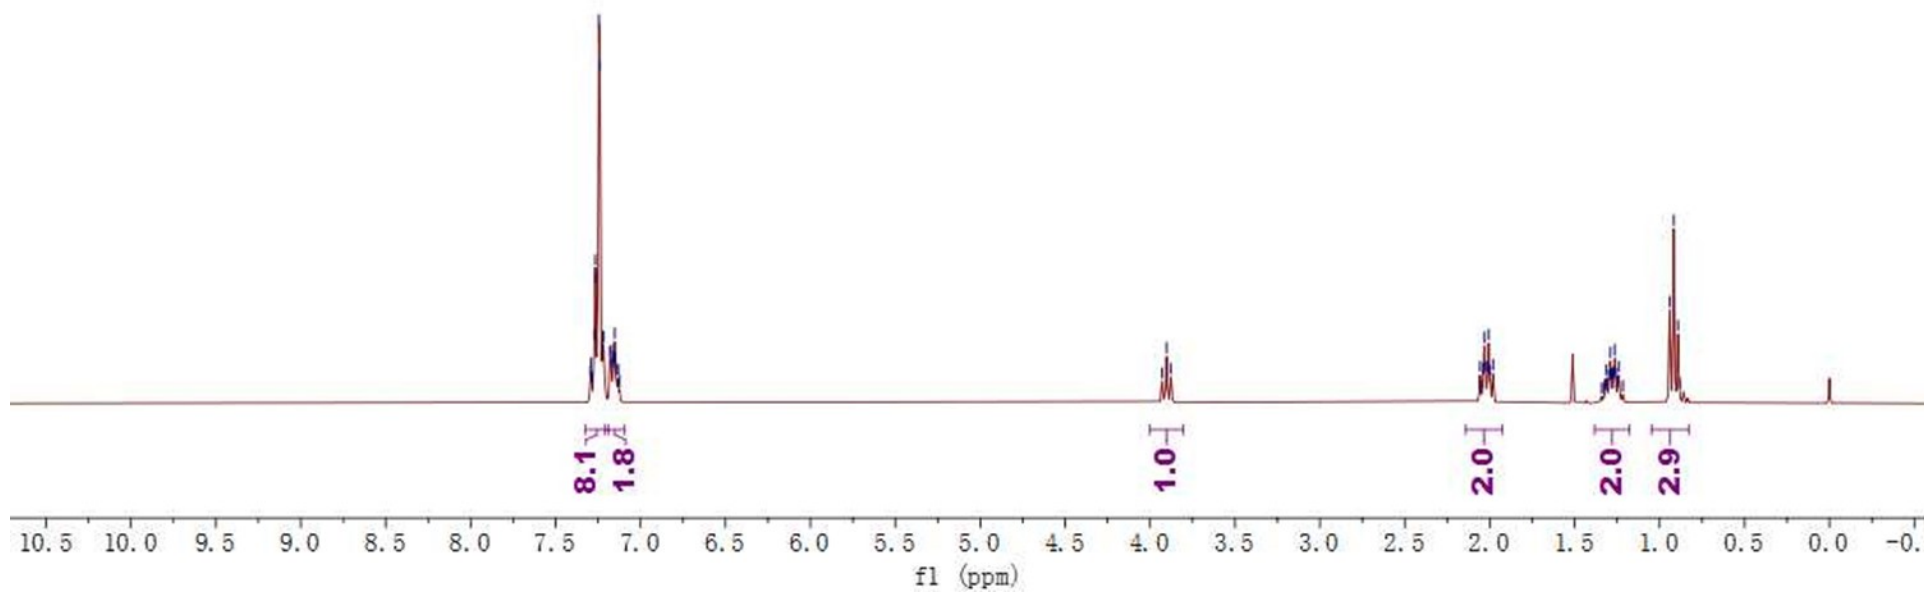

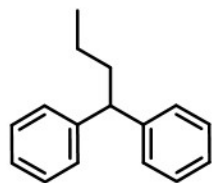

<sup>13</sup>C NMR

3o

-145.4

128.4

128.0

126.1

-51.2

-38.0

-21.3

-14.2

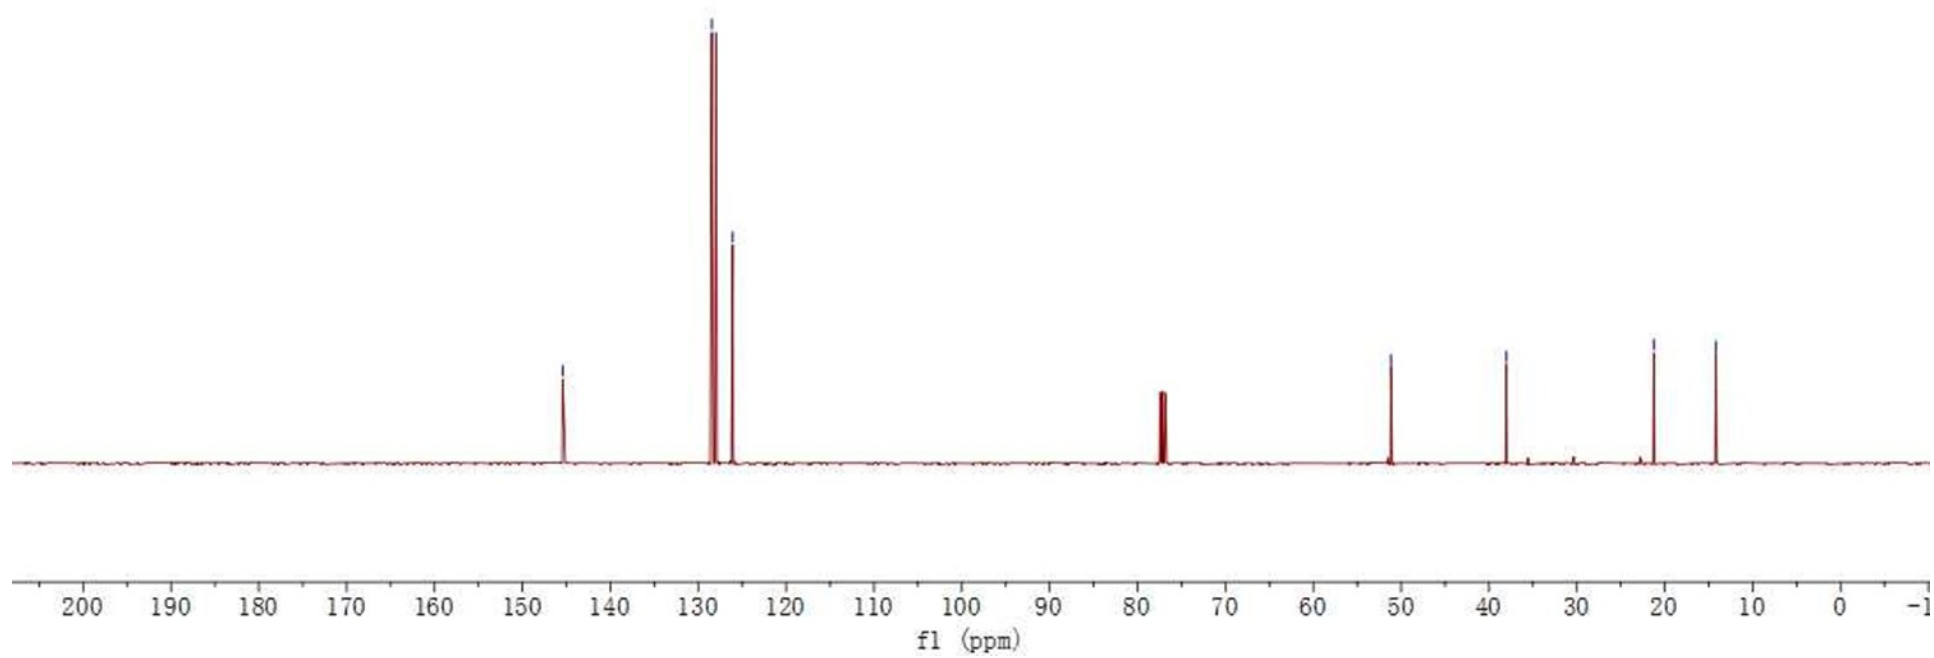



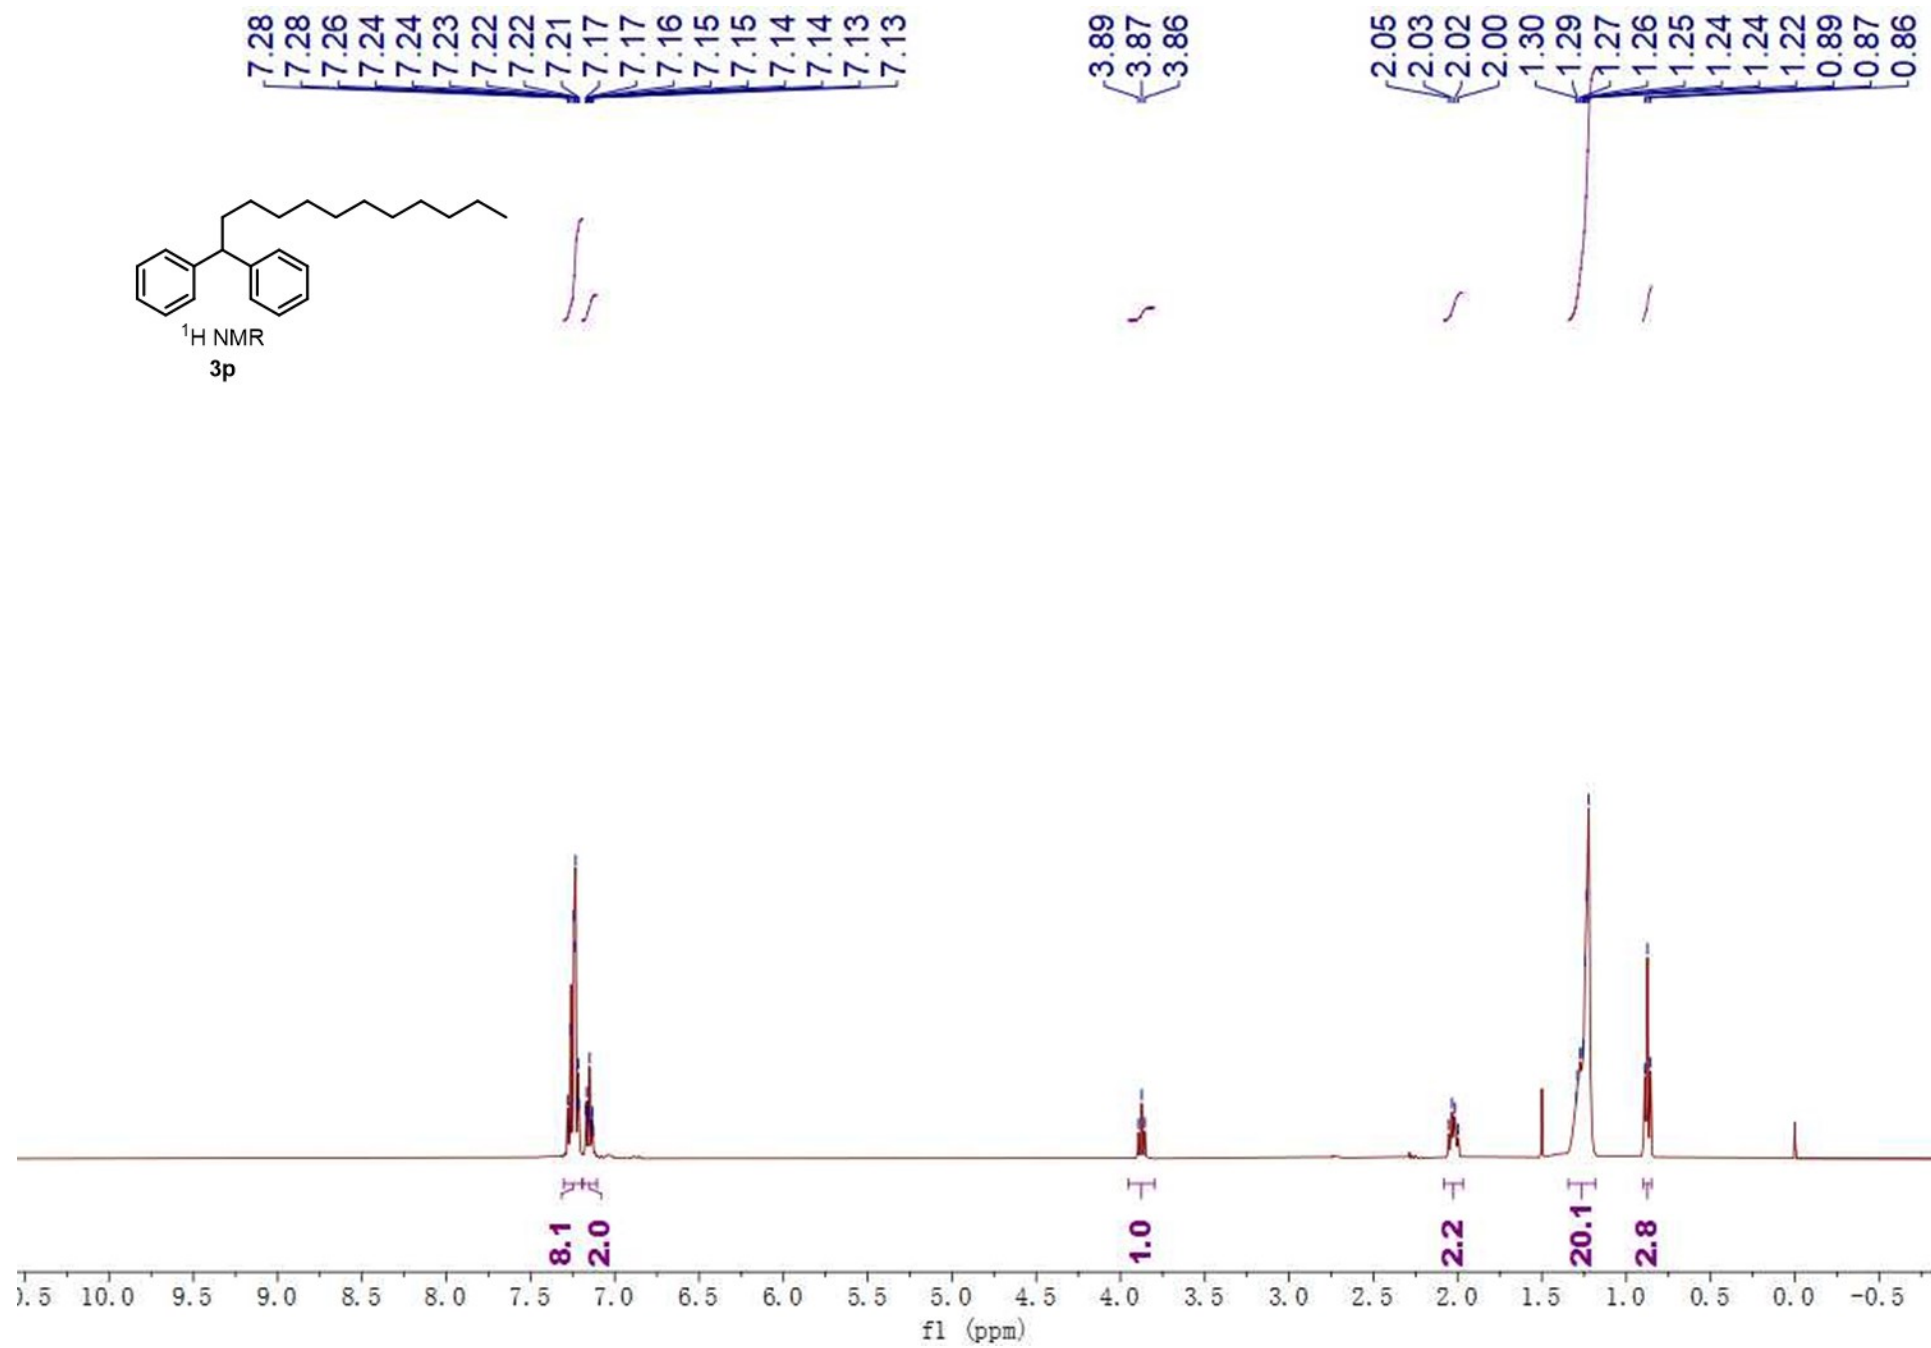

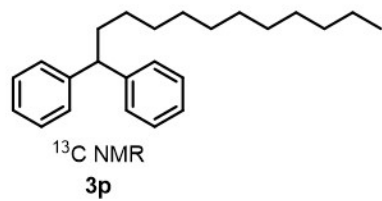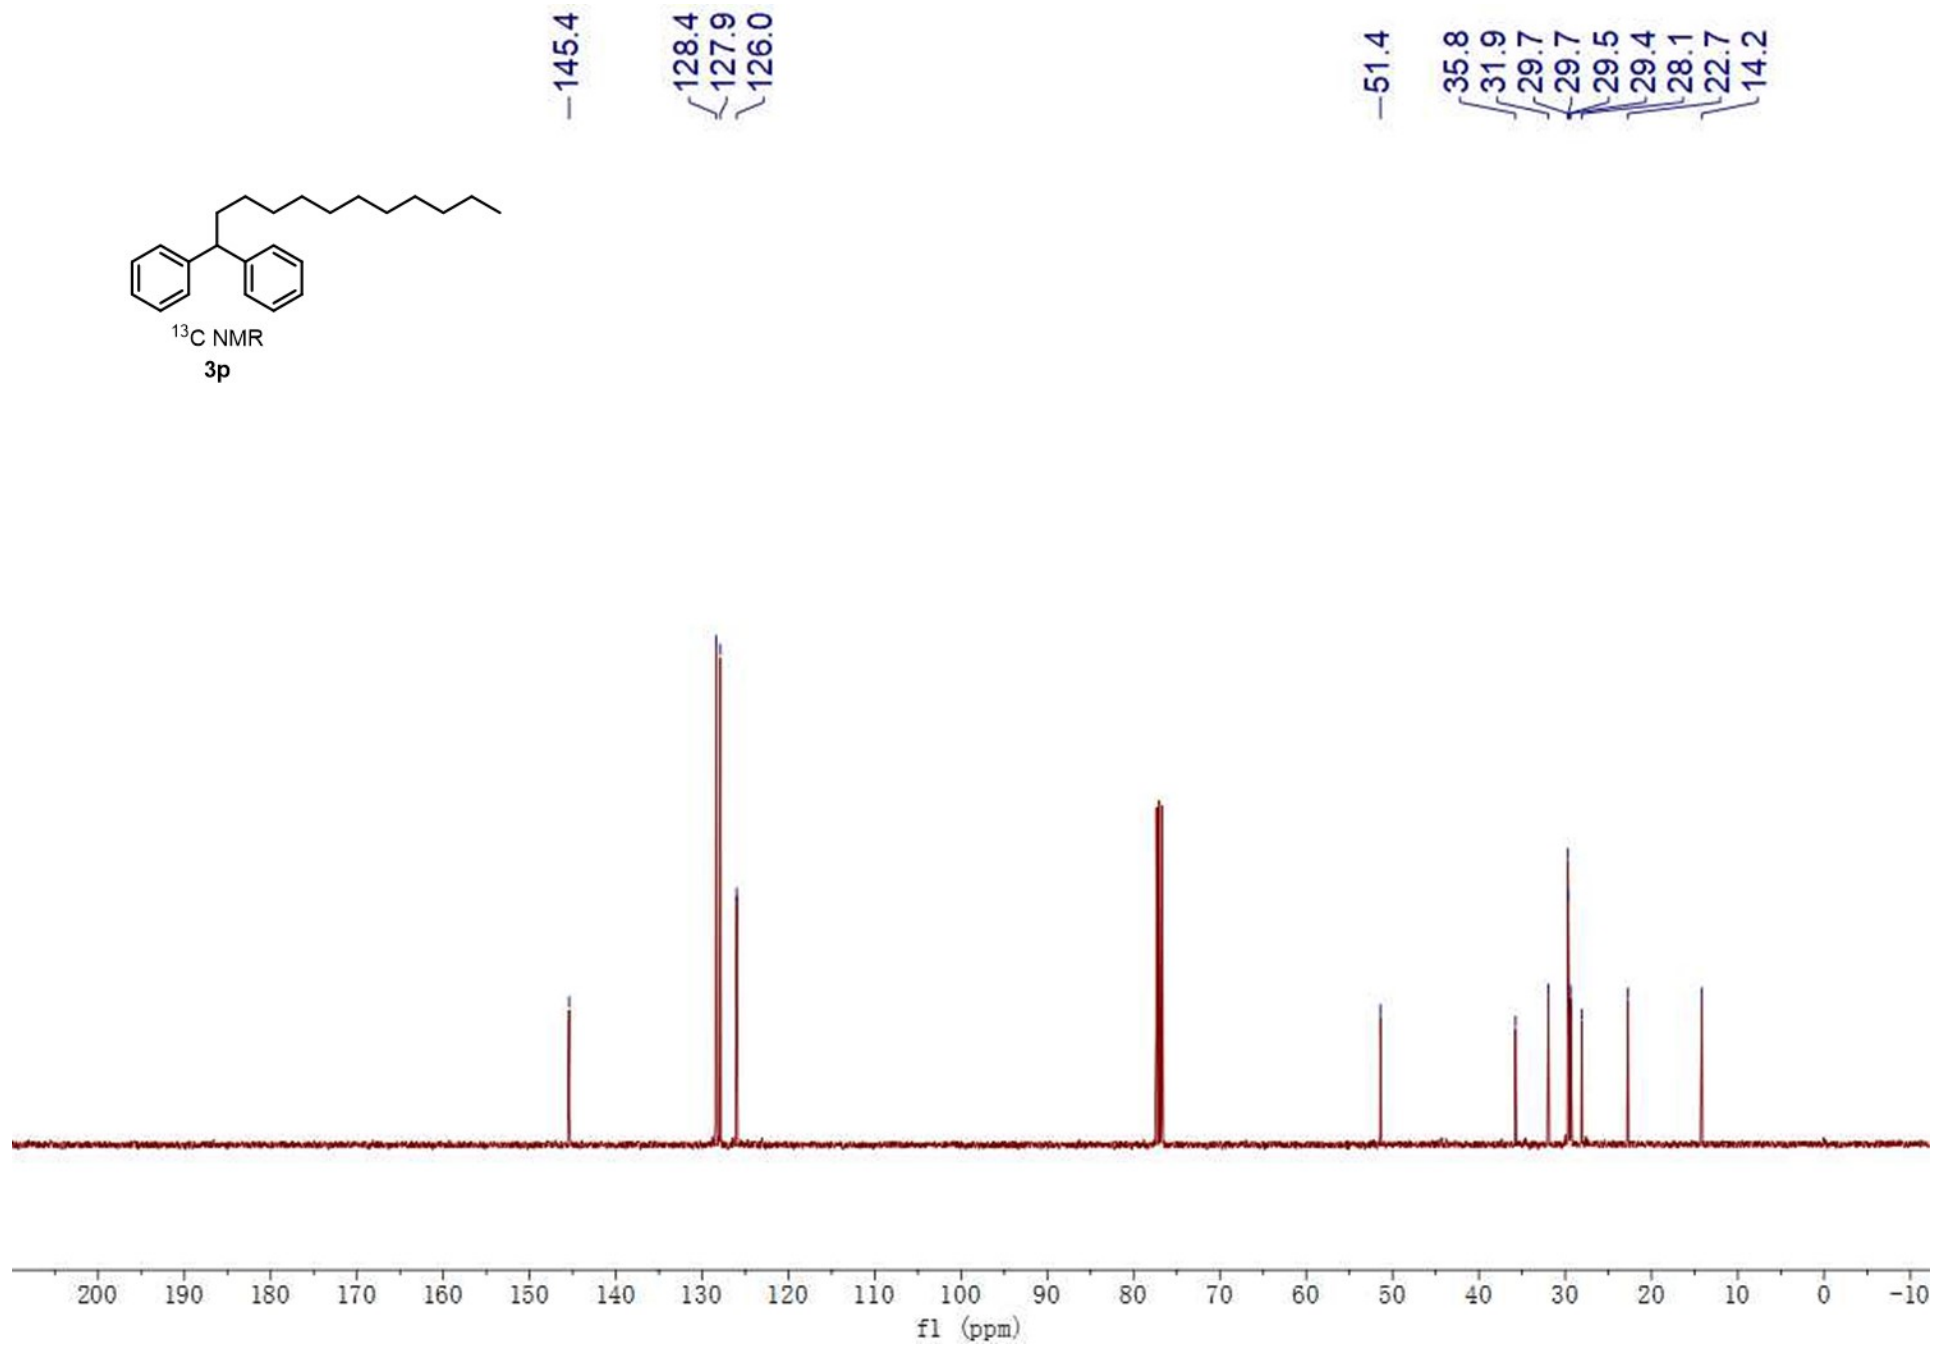

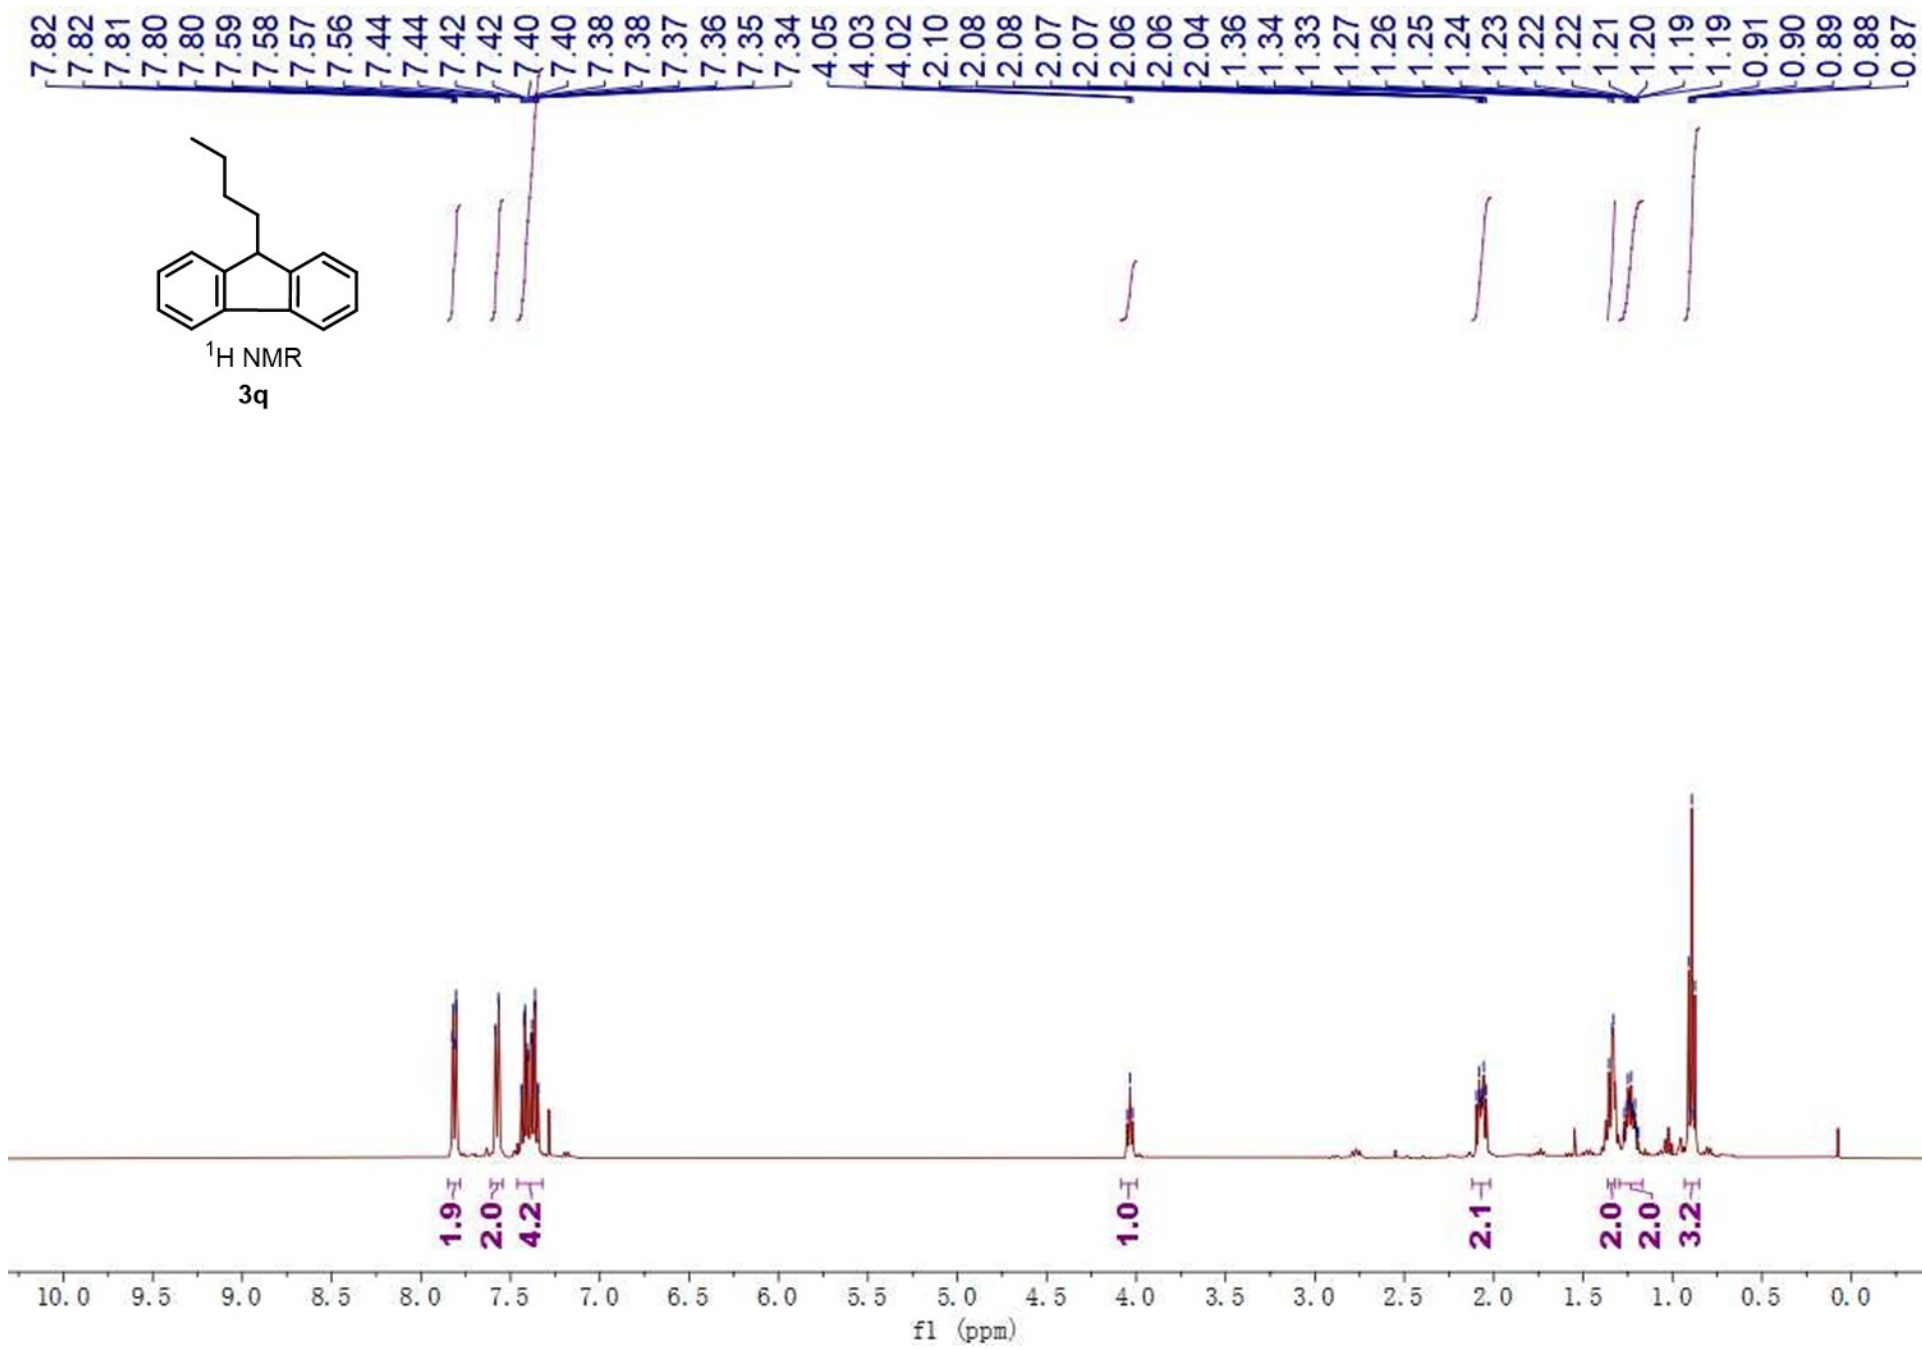

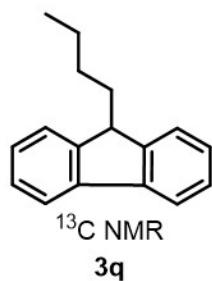

-147.7  
-141.2  
126.9  
126.8  
124.4  
119.8

-47.5  
-32.9  
-27.8  
-23.1  
-14.0

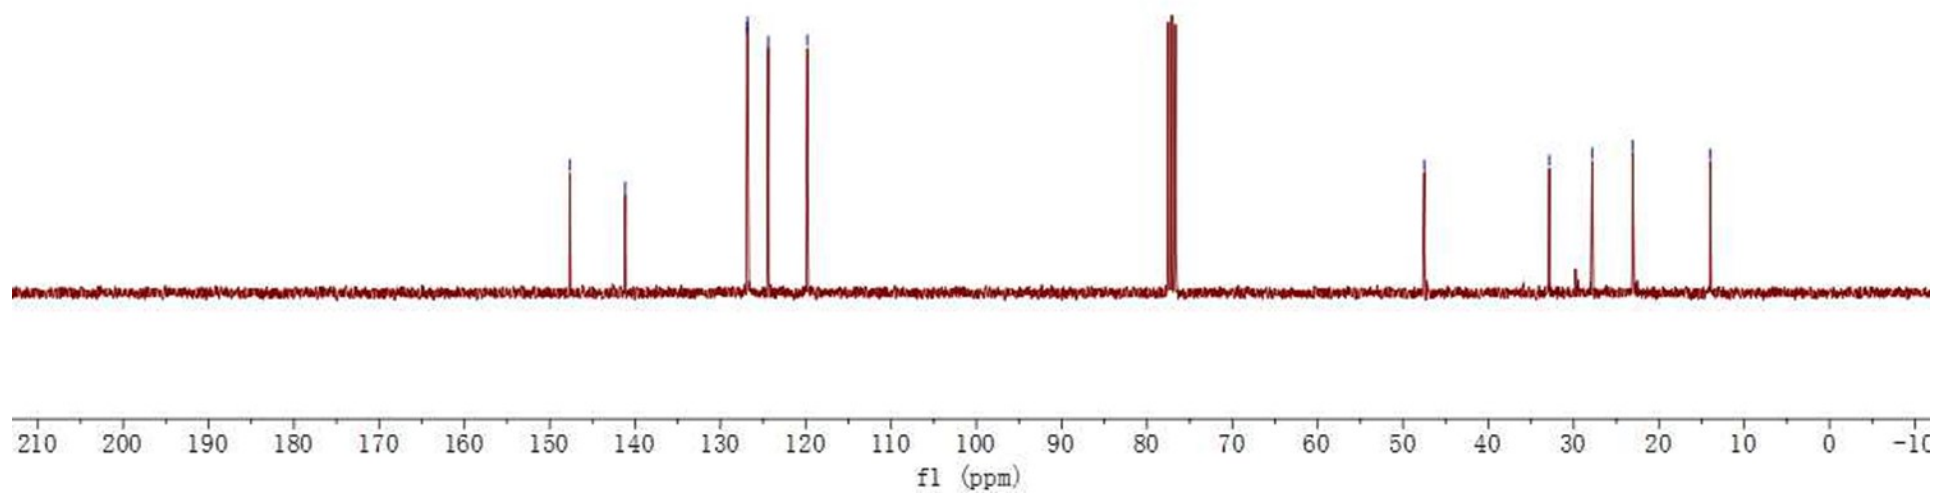

7.21  
7.20  
7.19  
7.18  
7.18  
7.02  
6.99  
3.18  
3.17  
3.15  
2.23  
1.95  
1.93  
1.92  
1.91  
1.90  
1.89  
1.88  
1.87  
1.65  
1.64  
1.63  
1.63  
1.62  
1.61  
1.60  
1.59  
1.52  
1.51  
1.50  
1.49  
1.49  
1.48  
1.48  
1.47  
1.46  
1.45  
1.44  
1.43  
1.42  
1.41  
1.41  
1.40  
1.39  
1.38  
1.37  
1.36  
1.35  
1.34  
1.34  
1.33

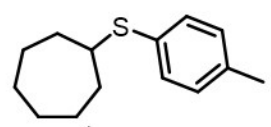

<sup>1</sup>H NMR  
3r

|||

~

|||  
|||  
|||

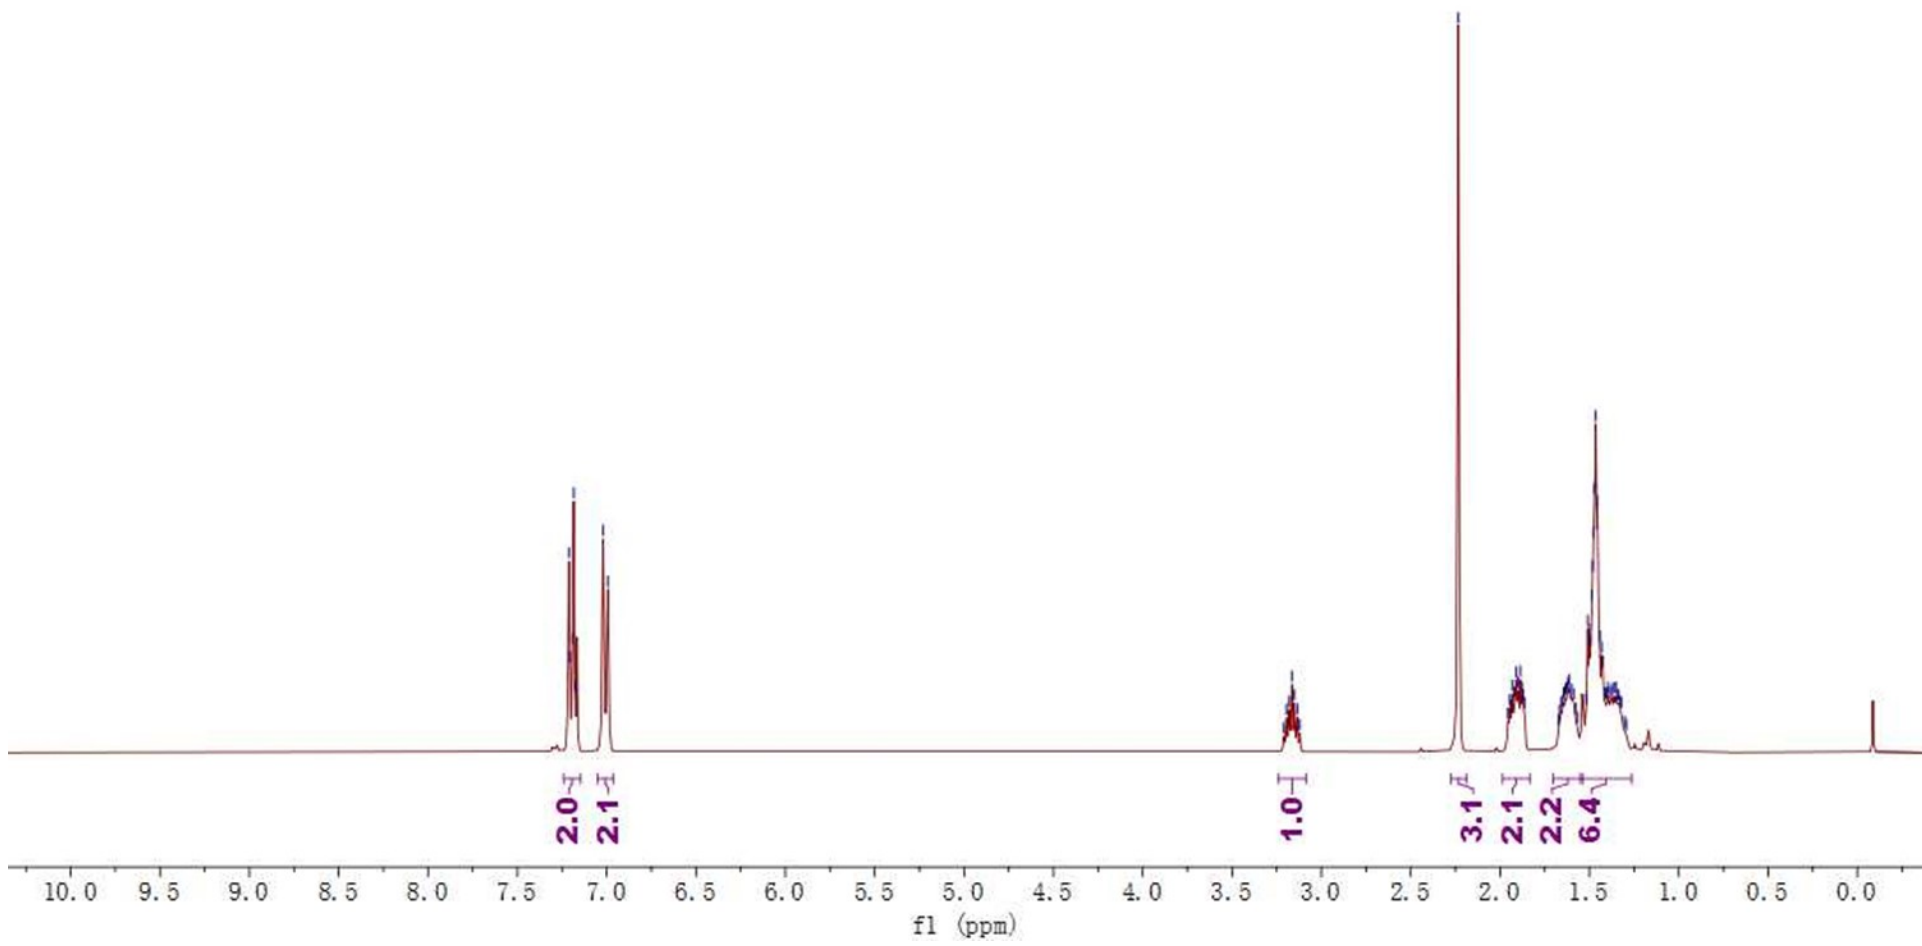

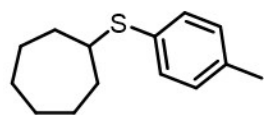

$^{13}\text{C}$  NMR  
3r

~136.6  
~132.0  
~129.5

-48.6

-34.6

~28.2

-25.9

-21.0

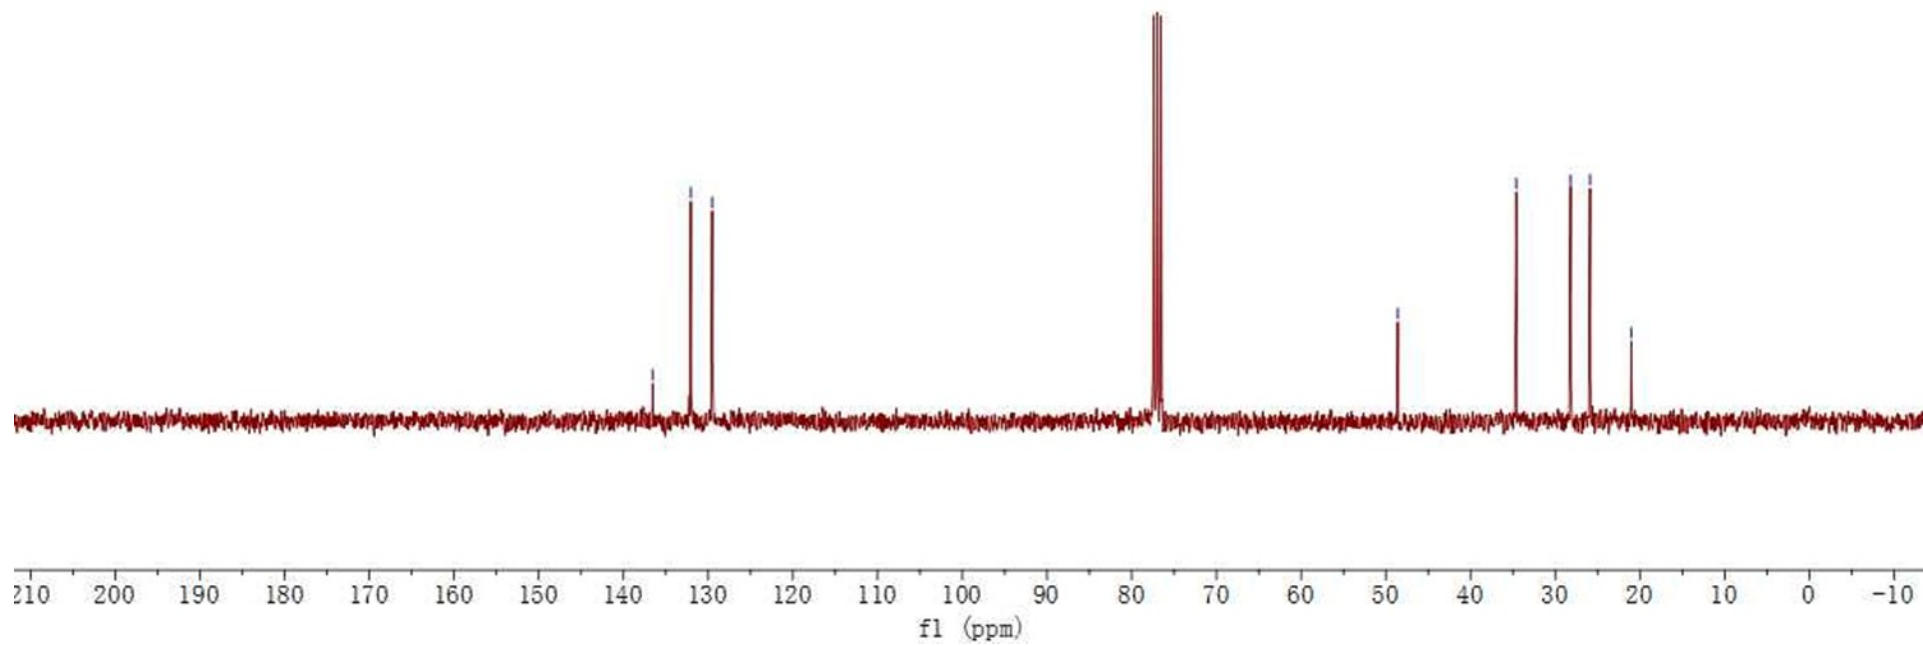

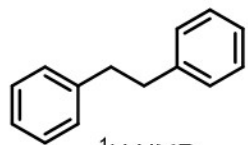

<sup>1</sup>H NMR  
3s

7.32  
7.31  
7.31  
7.30  
7.29  
7.28  
7.28  
7.27  
7.26  
7.22  
7.21  
7.21  
7.20  
7.20  
7.19  
7.18  
7.17  
7.17  
7.16

-2.92

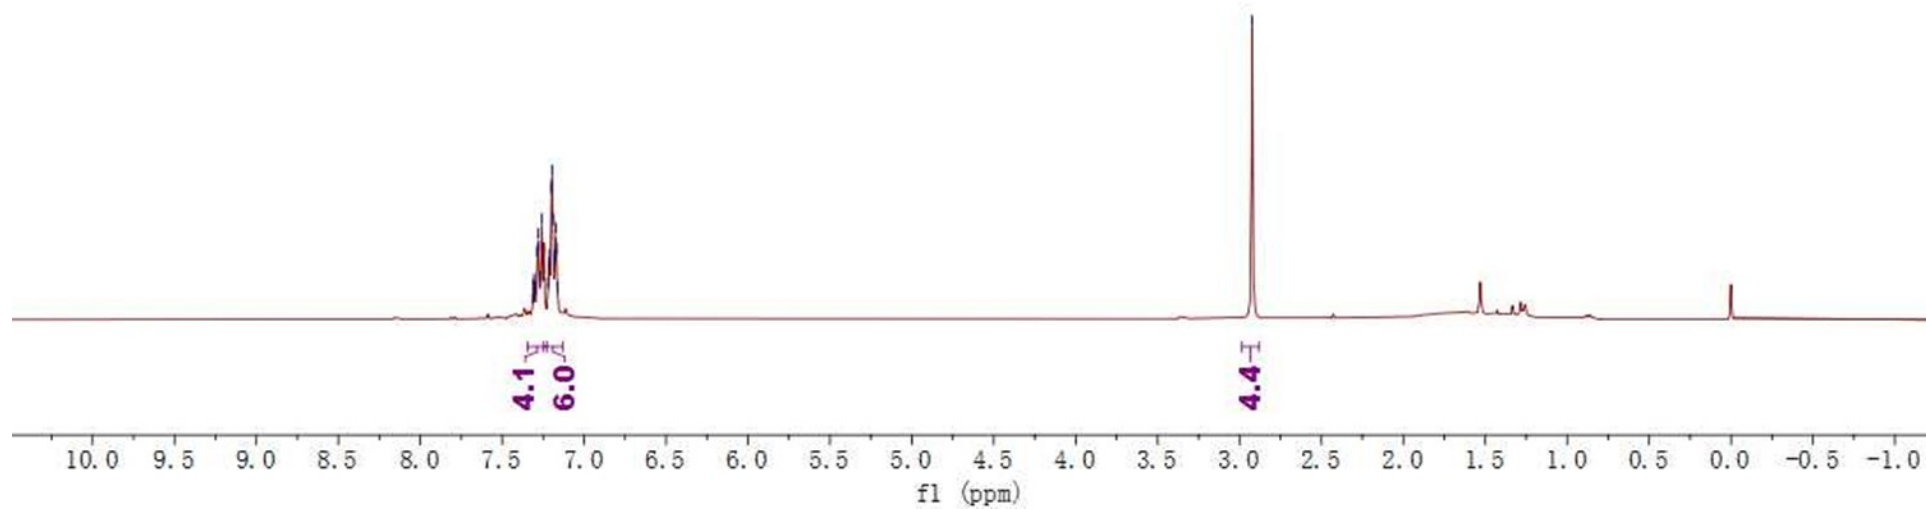

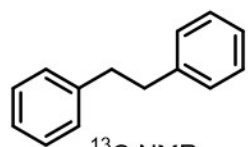

<sup>13</sup>C NMR  
3s

—141.8

128.5

128.3

125.9

—38.0

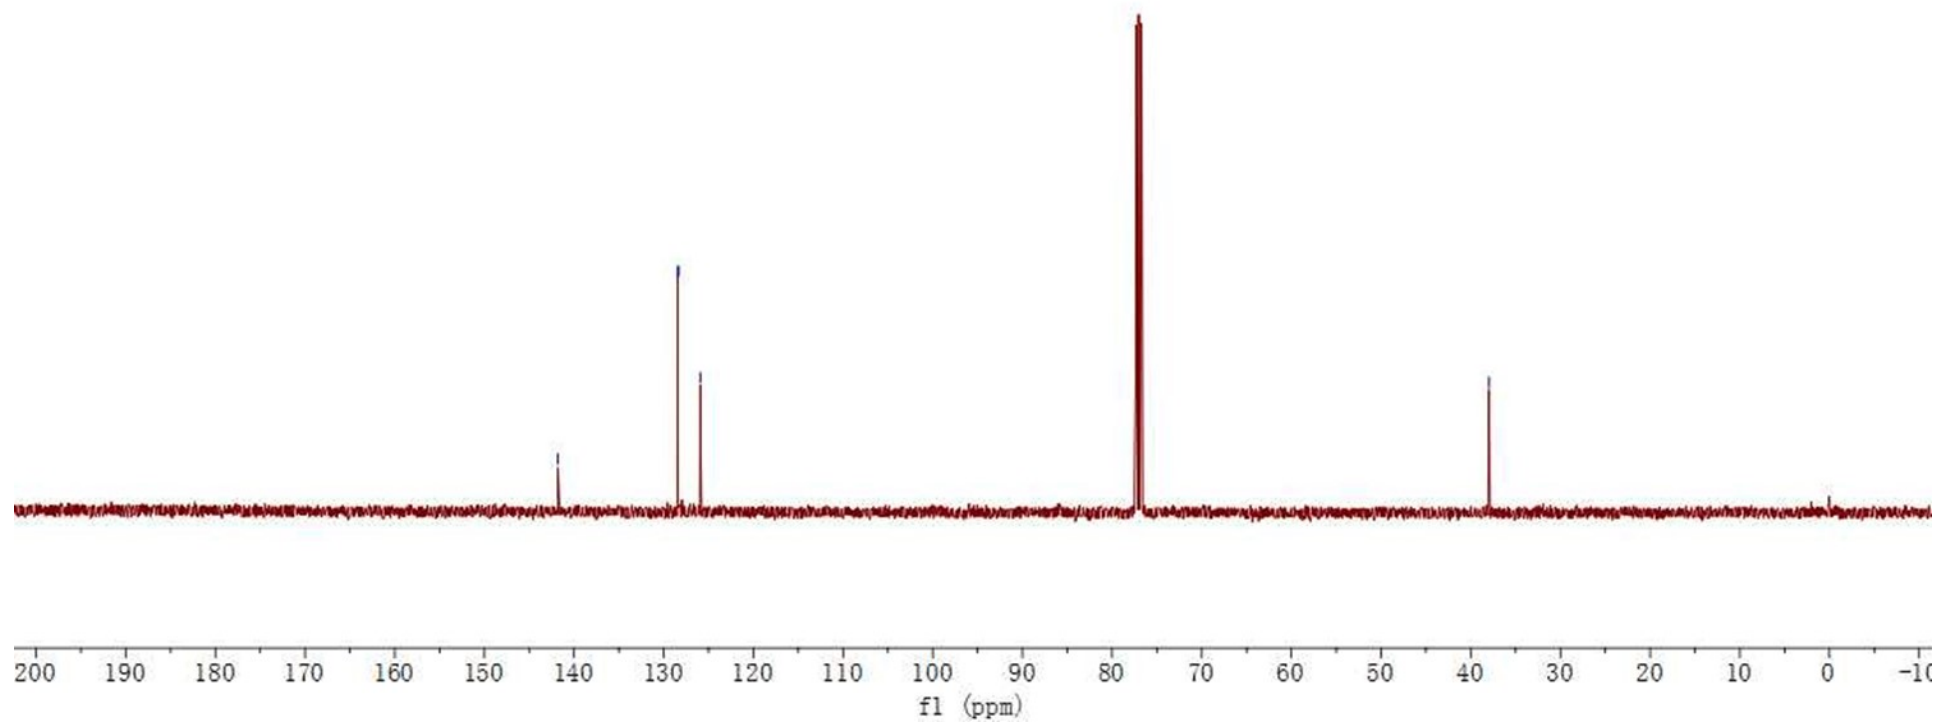



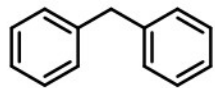

<sup>1</sup>H NMR  
6a

7.31  
7.30  
7.30  
7.28  
7.28  
7.27  
7.27  
7.25  
7.22  
7.21  
7.19  
7.18  
7.17  
7.17

—3.98

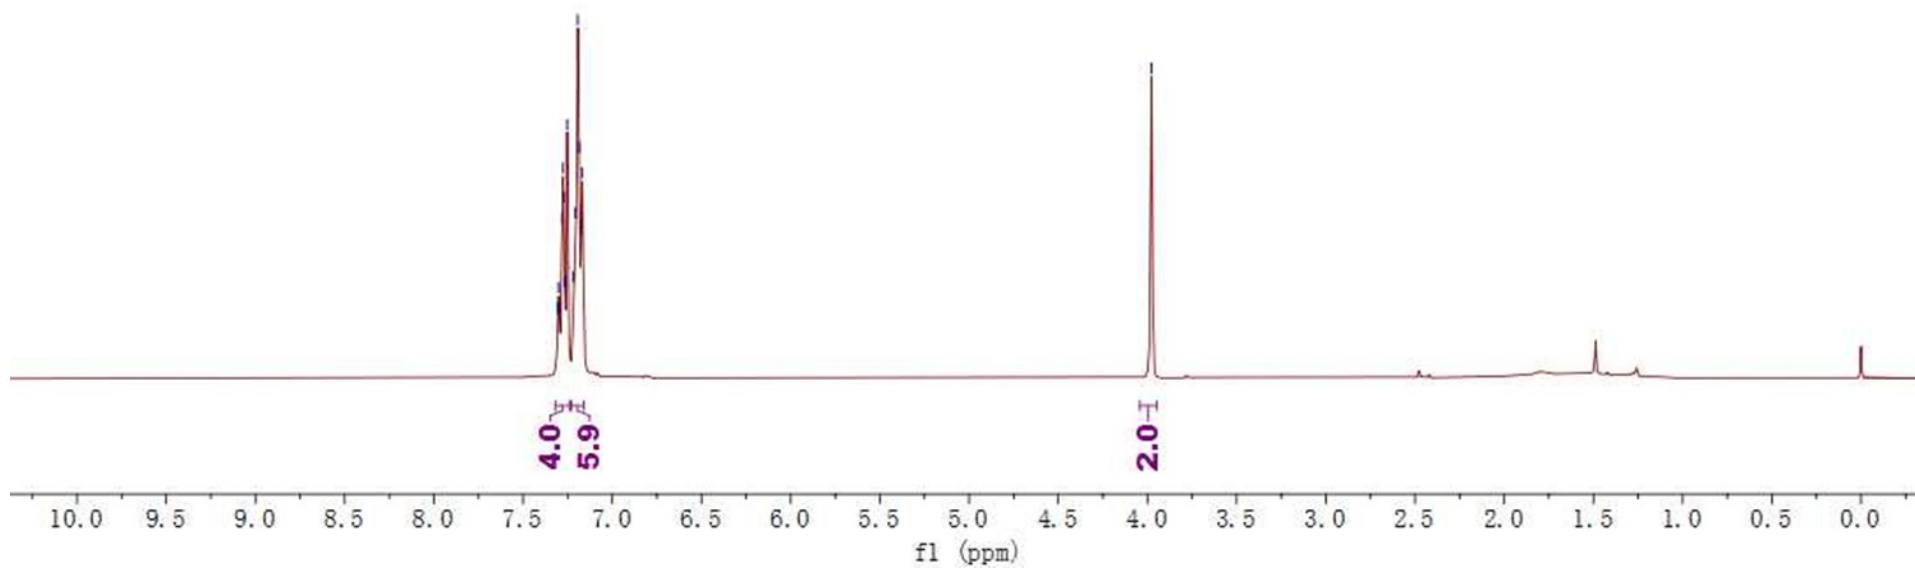

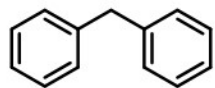

<sup>13</sup>C NMR  
**6a**

-141.2

129.0

128.5

126.1

-42.0

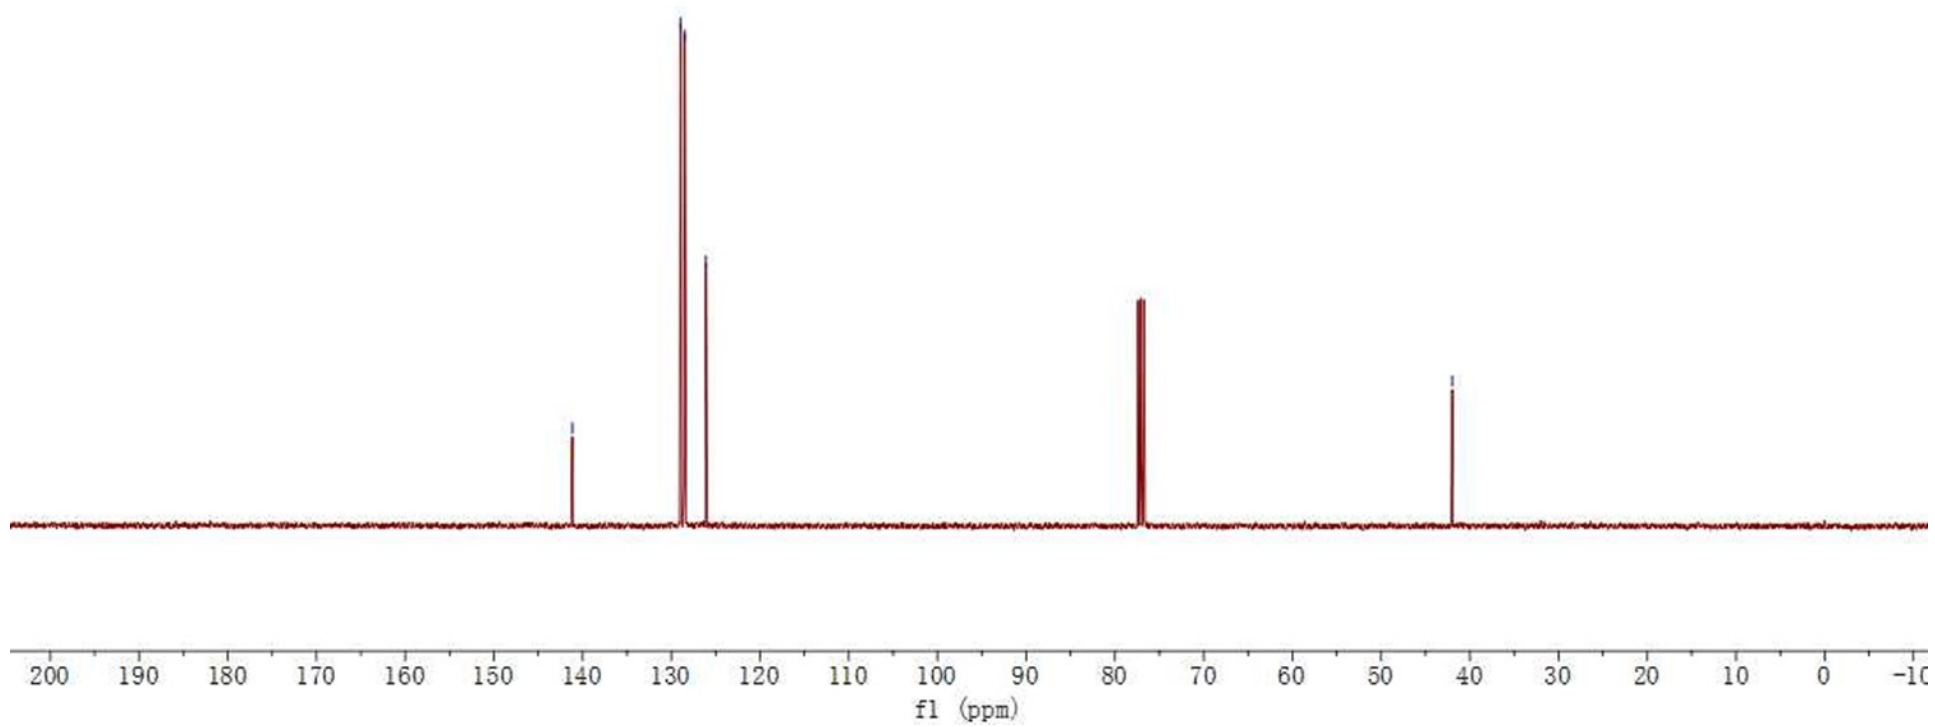

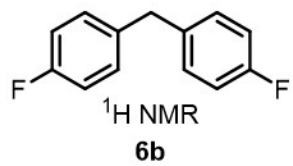

7.17  
7.16  
7.15  
7.14  
7.13  
7.12  
7.11  
7.04  
7.03  
7.03  
7.01  
7.01  
7.00  
6.98  
6.98  
6.97

3.95

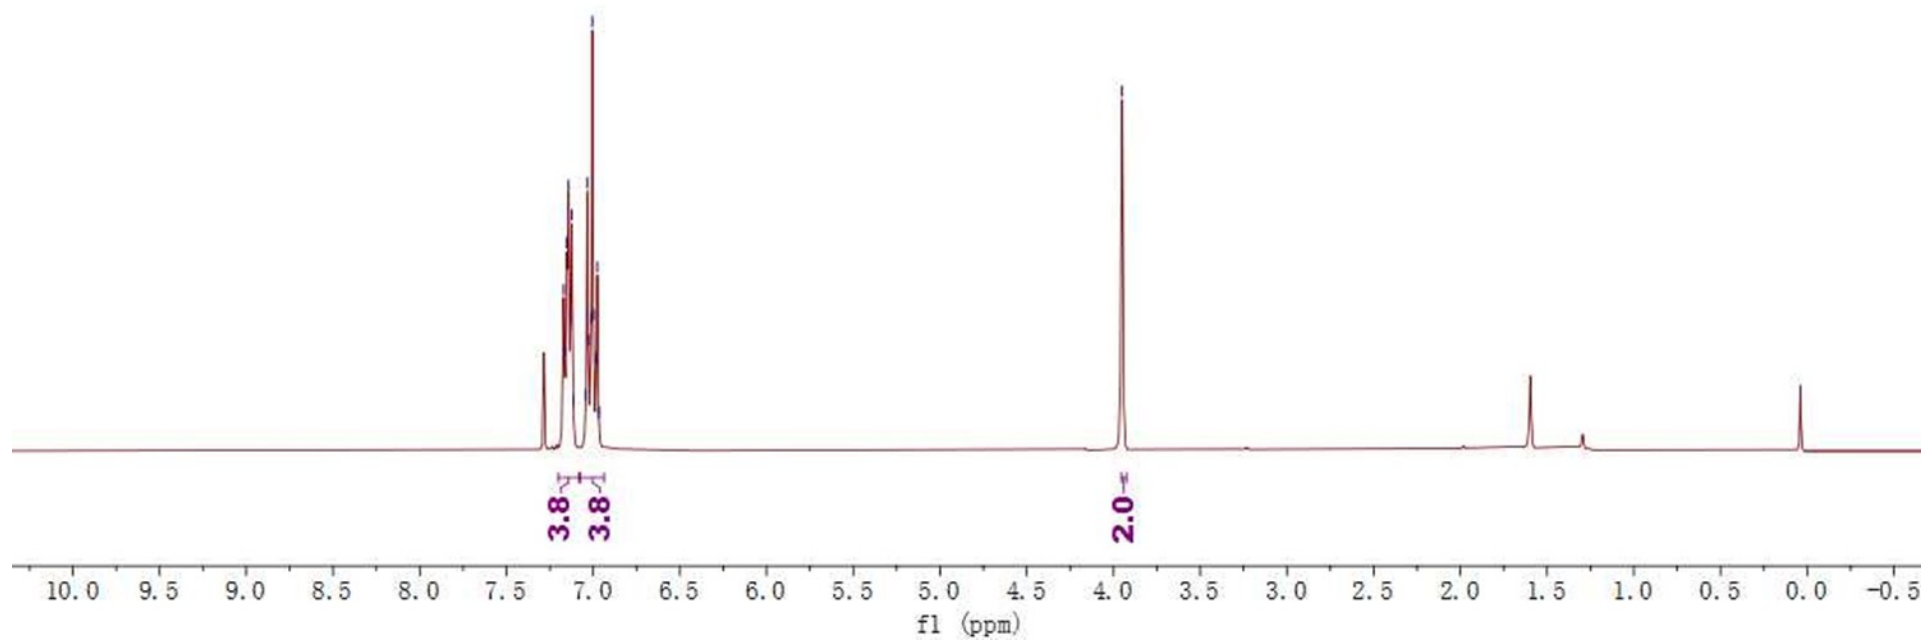

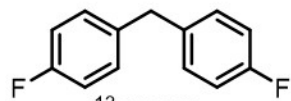

<sup>13</sup>C NMR

**6b**

~162.8  
~160.3

136.7  
136.7  
130.3  
130.2

115.5  
115.3

-40.3

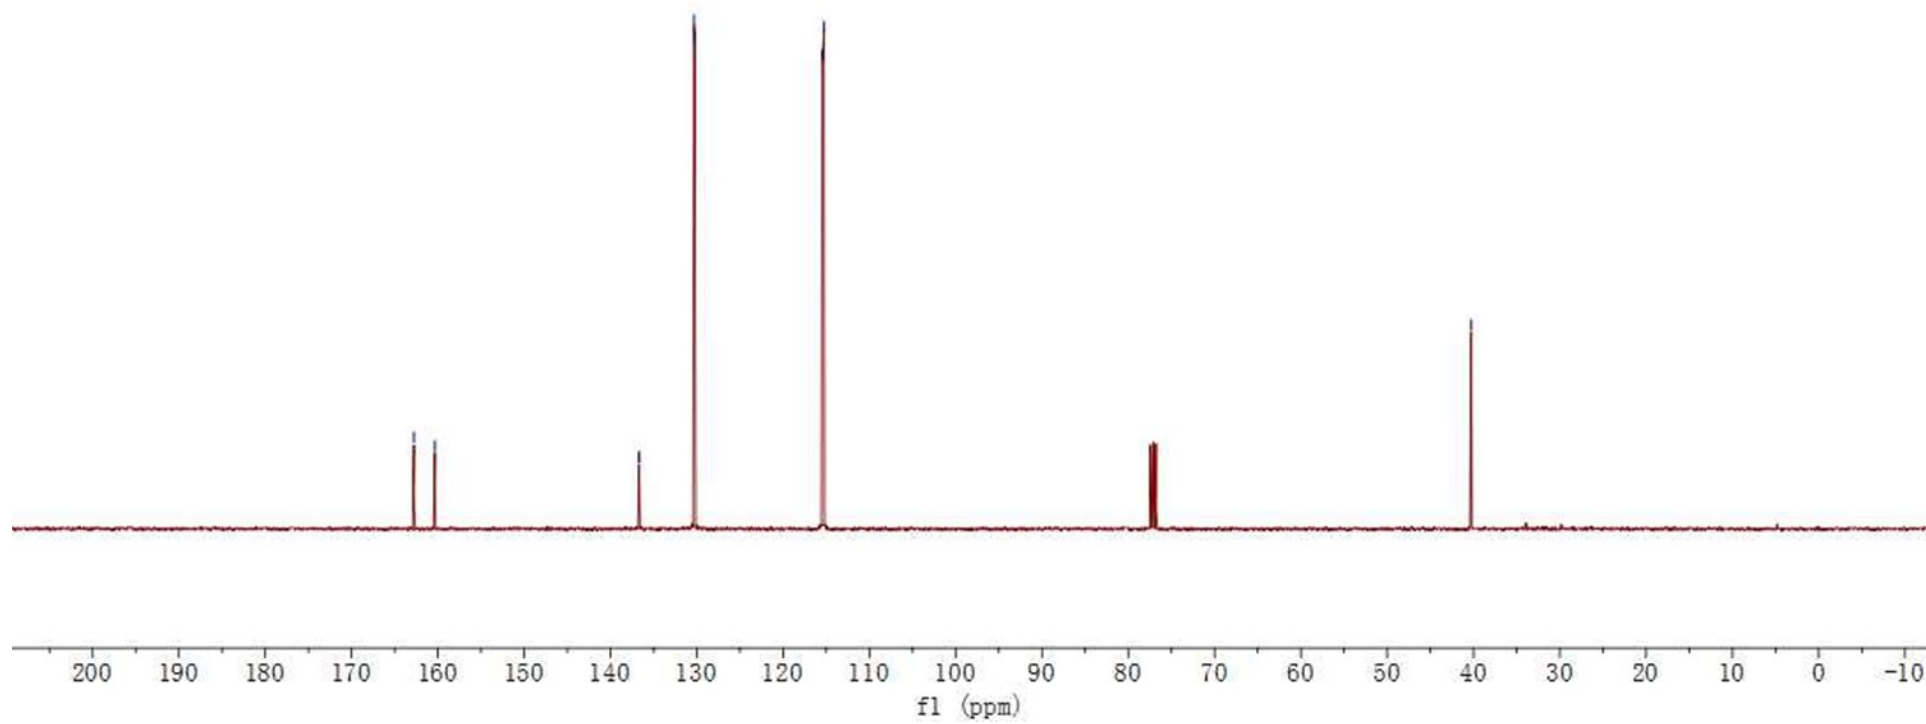

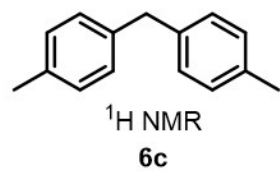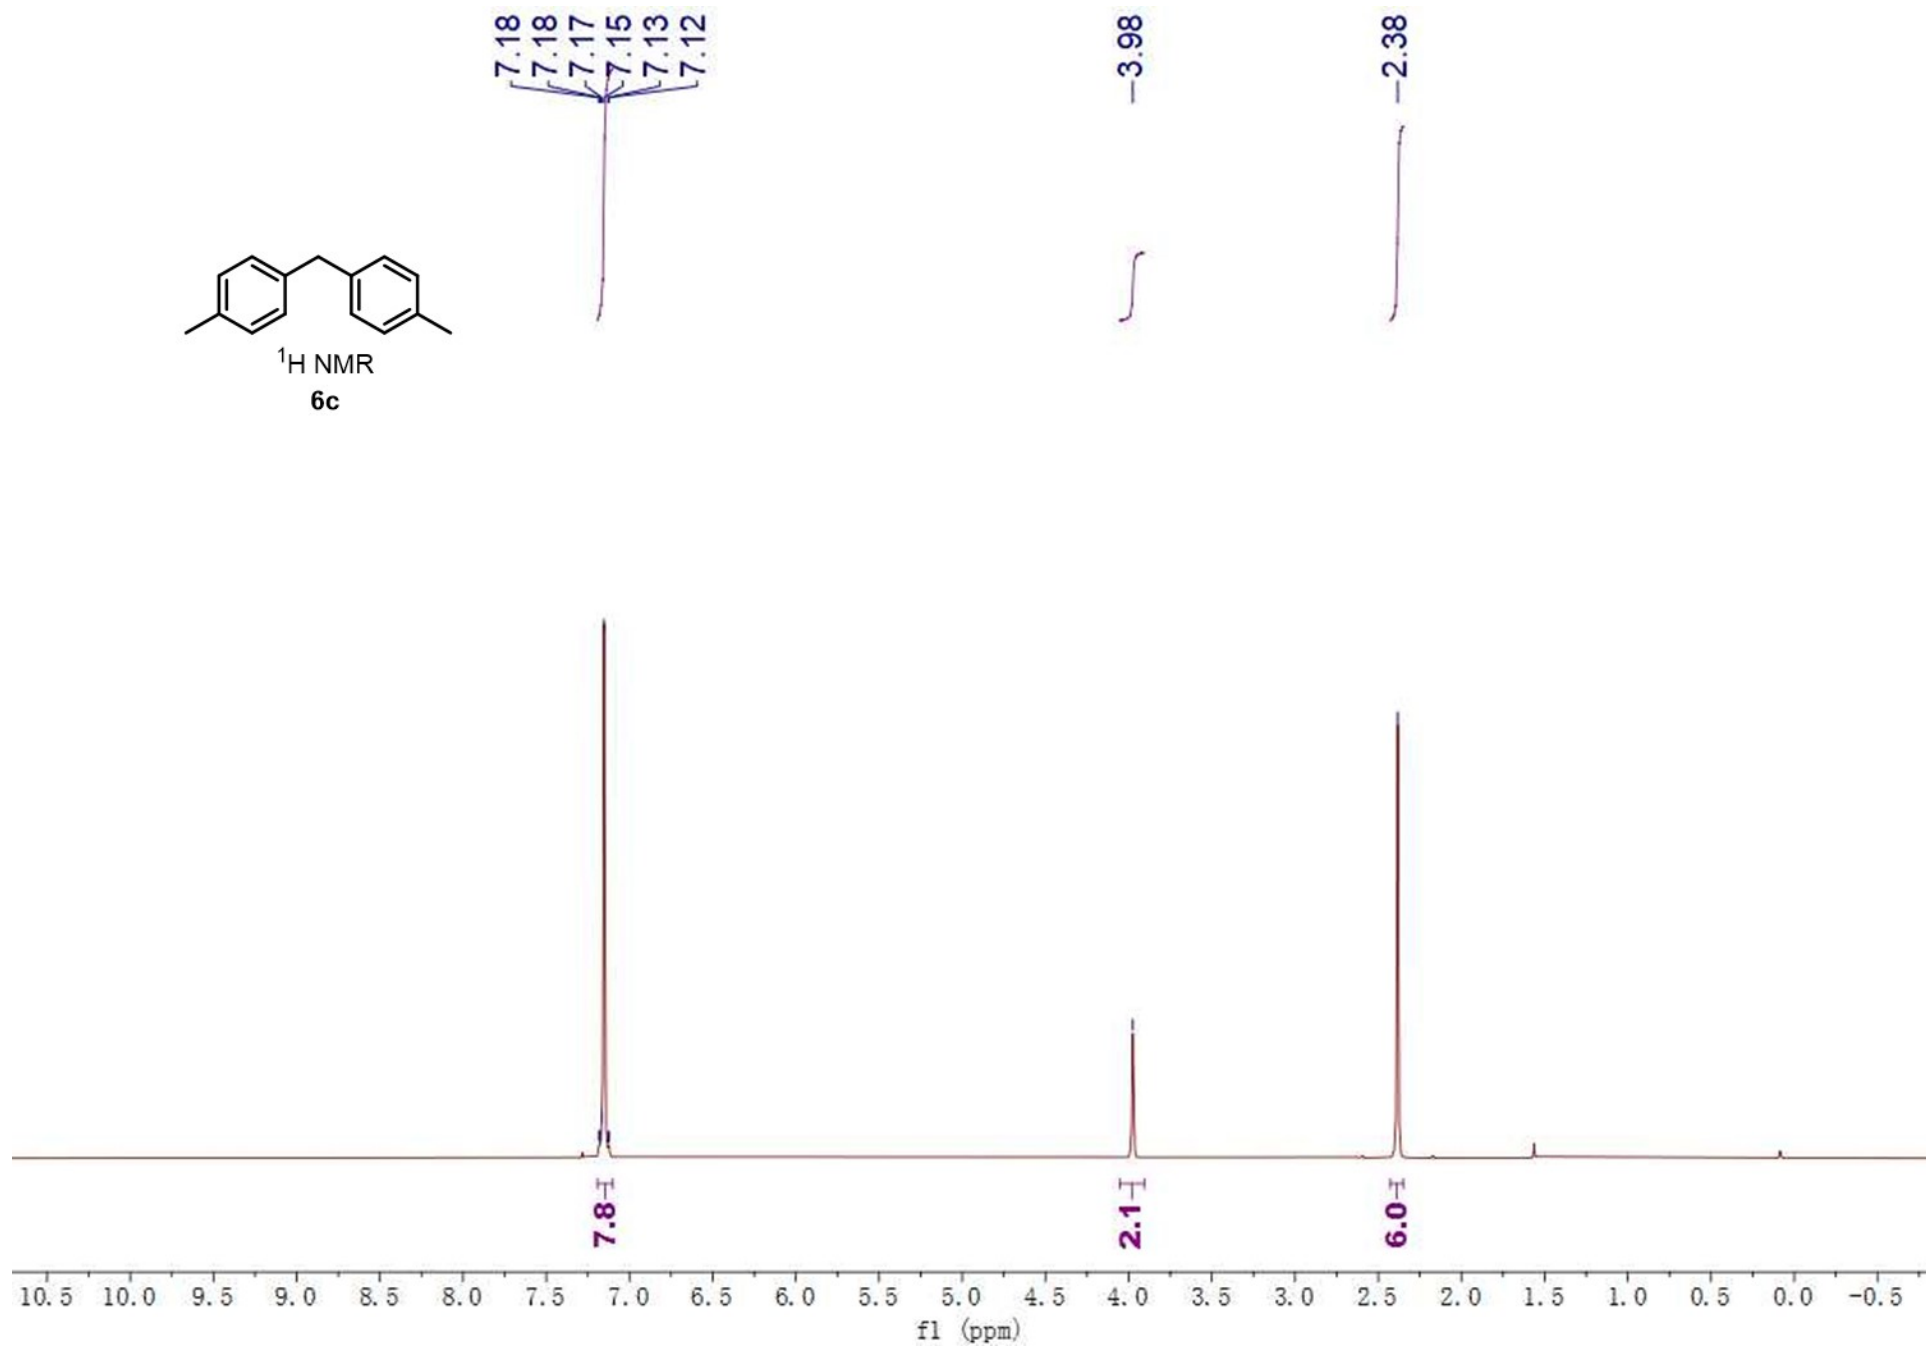

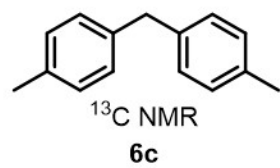

138.5  
135.5  
129.2  
128.9

-41.2

-21.1

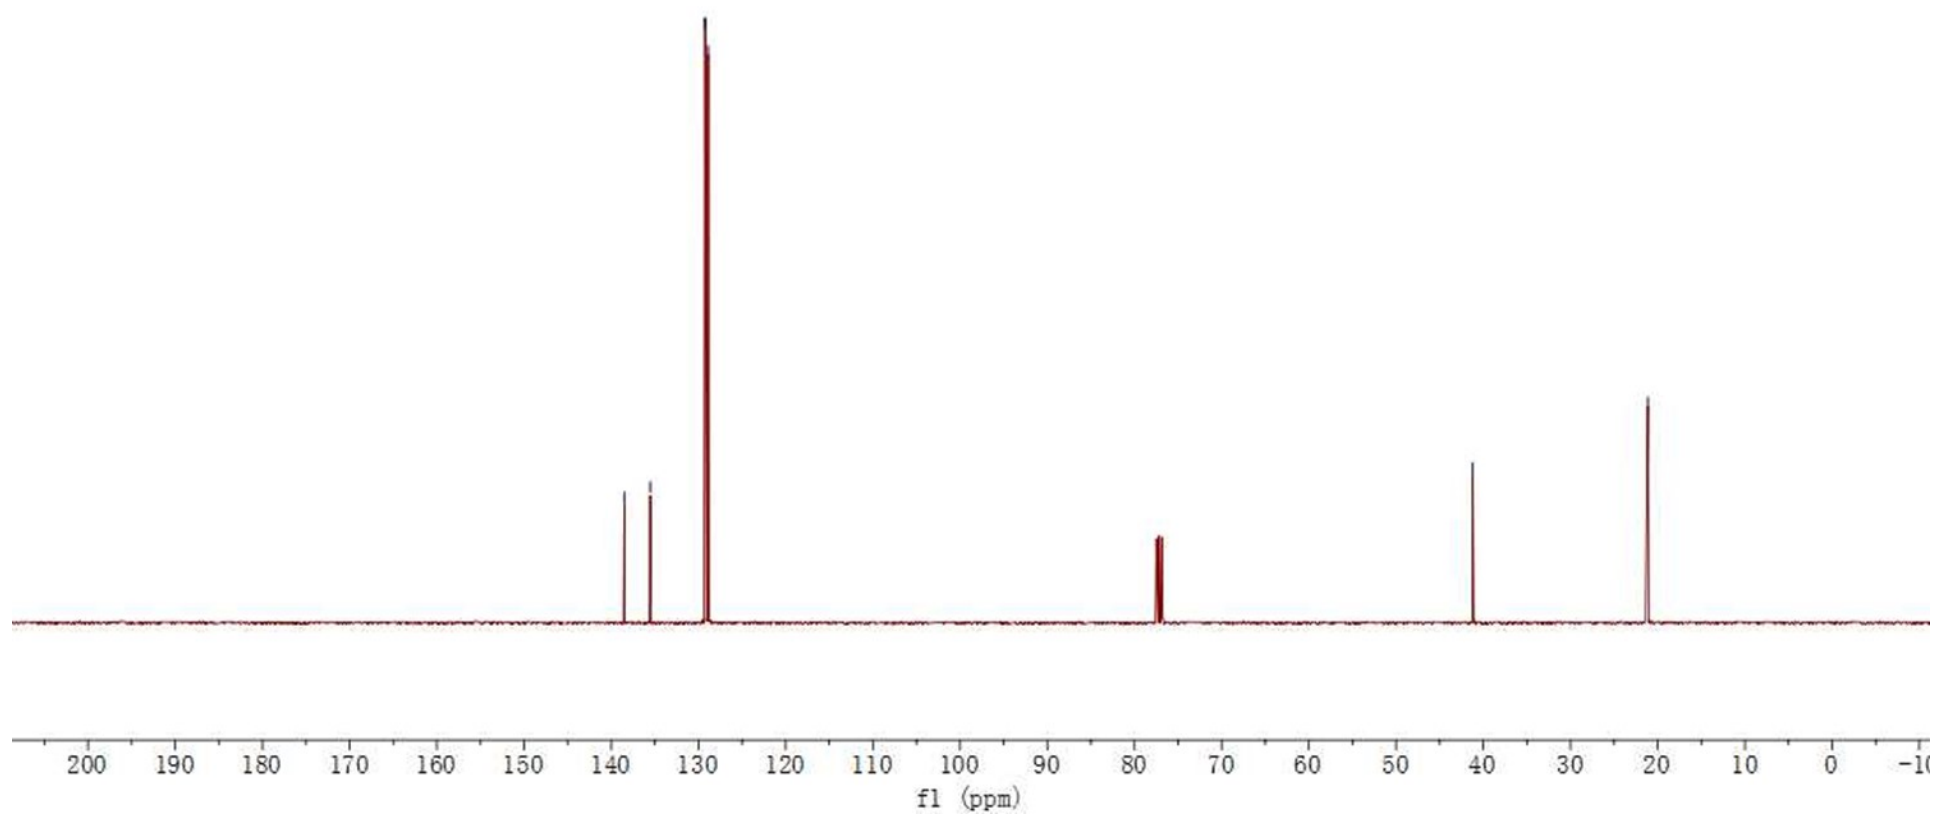

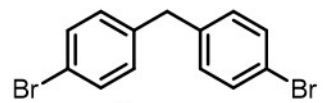

<sup>1</sup>H NMR

6d

7.36  
7.36  
7.35  
7.35  
7.34  
7.34  
7.33  
7.33  
7.28  
7.27  
7.27  
7.26  
7.25  
7.25  
7.24  
7.23

-4.05

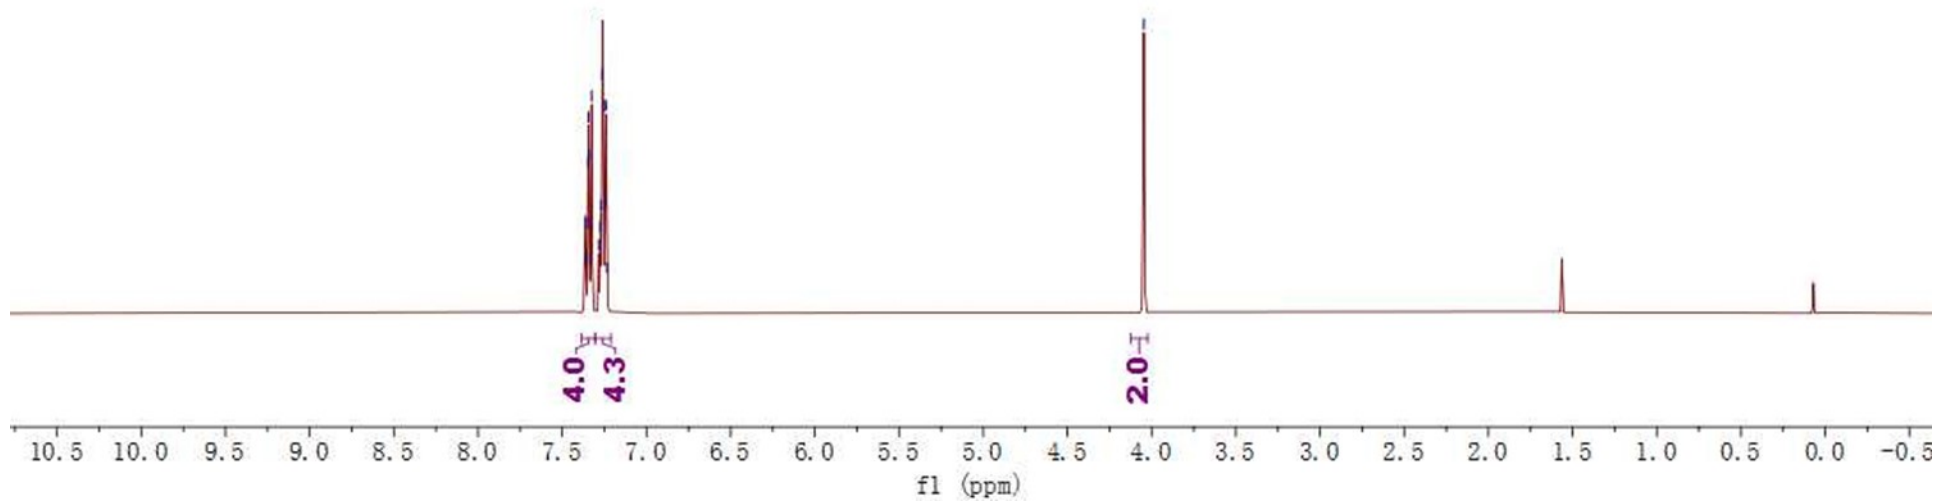

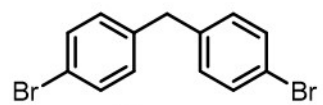

<sup>13</sup>C NMR

**6d**

-141.2

129.1

128.6

126.2

-42.1

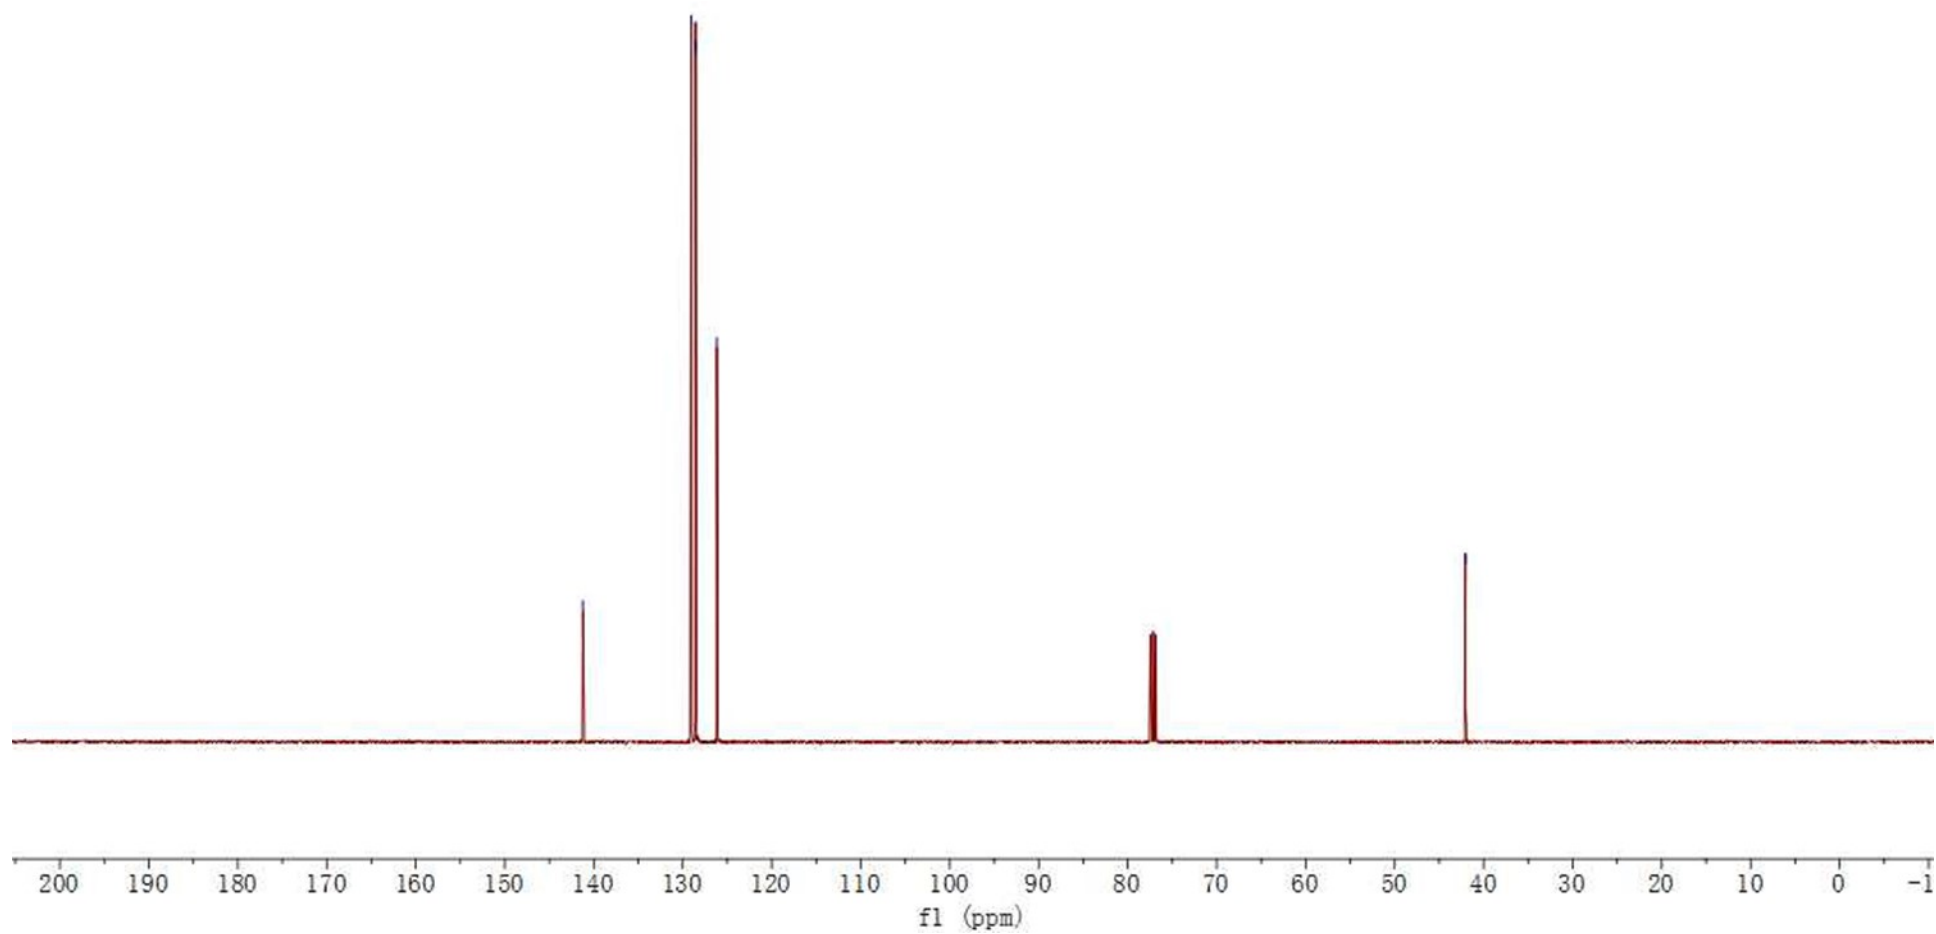



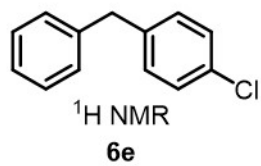

7.30  
7.30  
7.27  
7.21  
7.19  
7.18  
7.17

-3.97

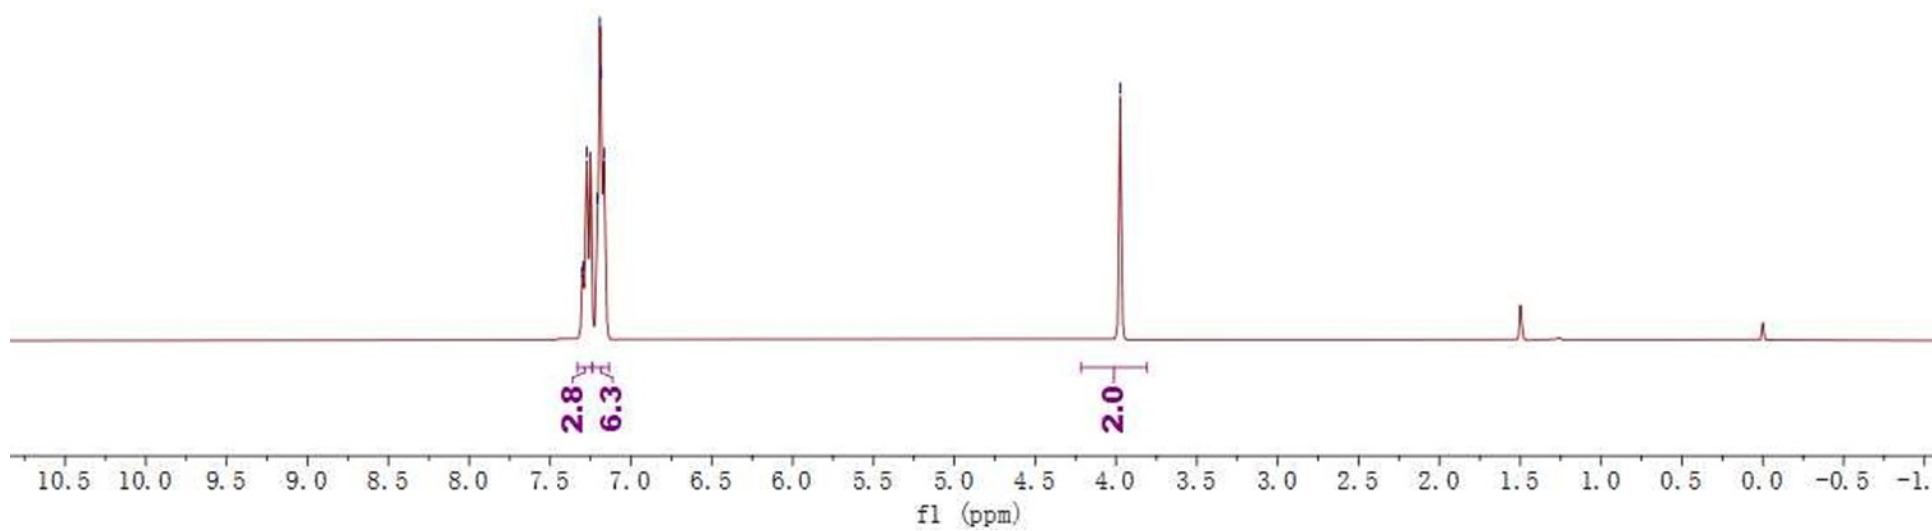

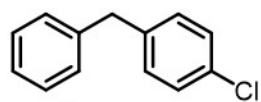

<sup>13</sup>C NMR

**6e**

-141.3

129.2

128.7

126.3

-42.2

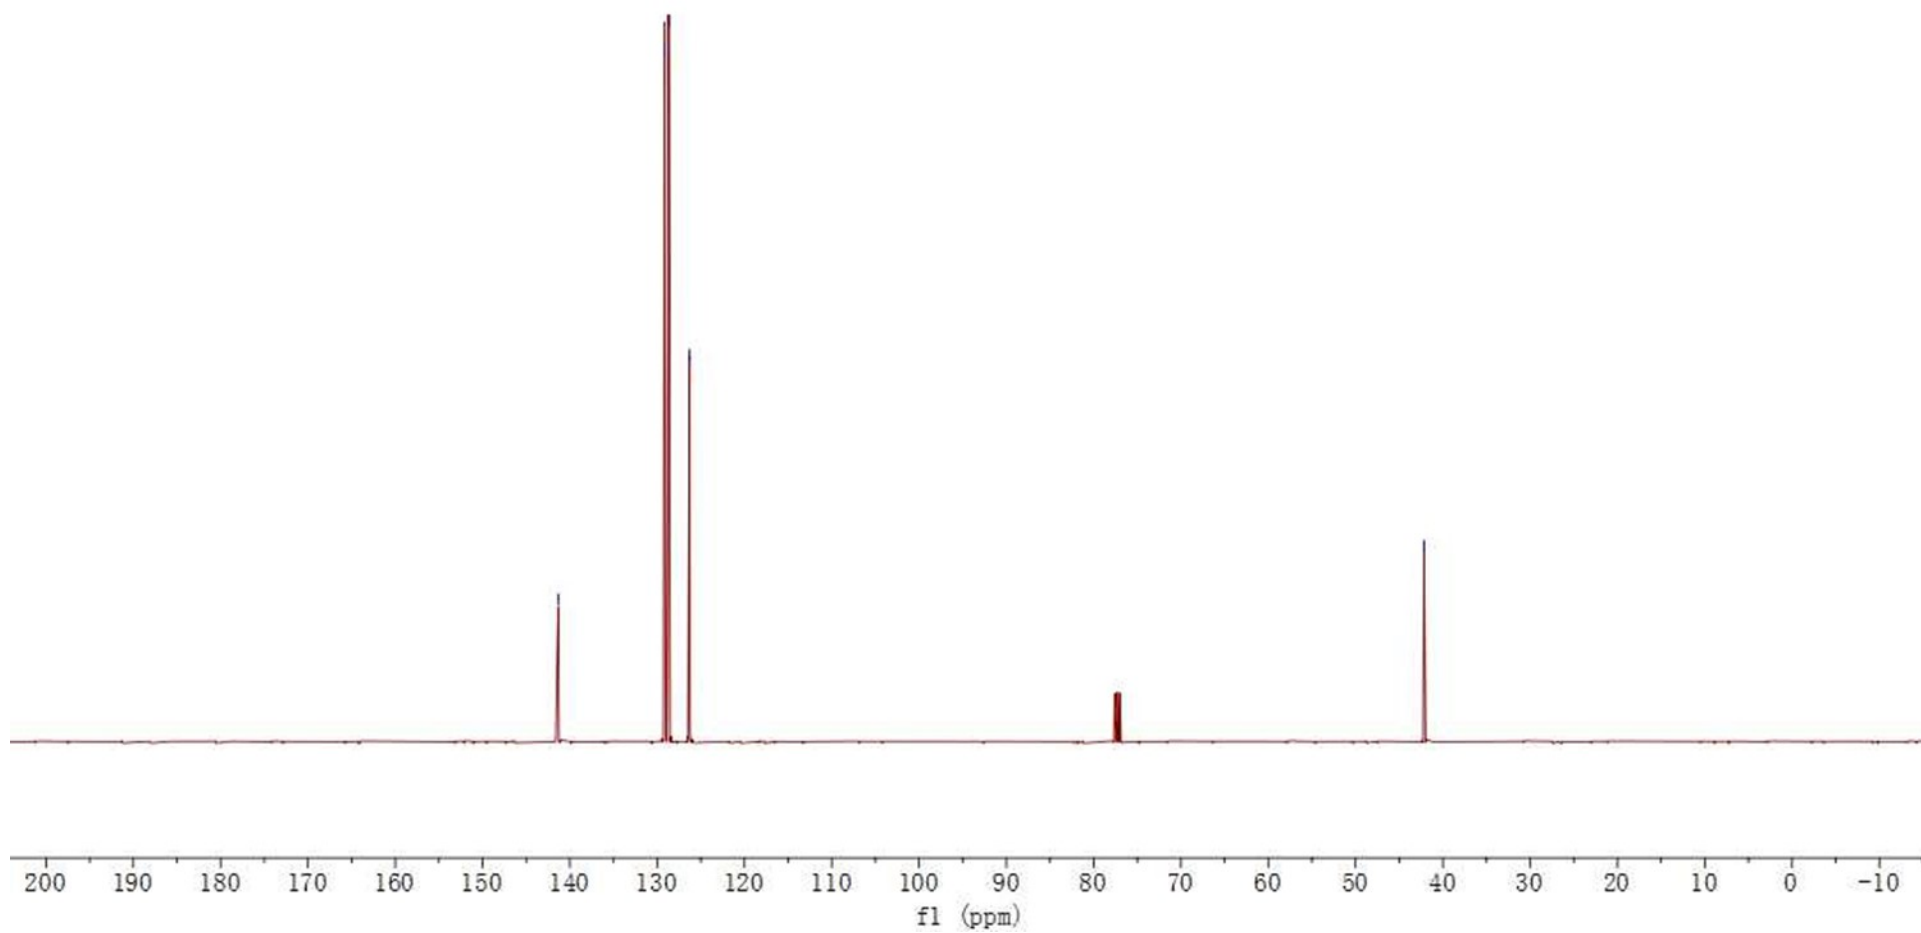

7.30  
7.30  
7.29  
7.28  
7.25  
7.25  
7.23  
7.23  
7.22  
7.22  
7.21  
7.20  
7.19  
7.18  
7.17  
7.13  
7.12  
7.11  
7.11  
7.10  
-5.55

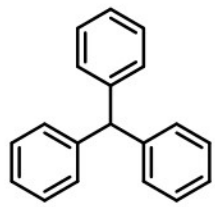

<sup>1</sup>H NMR  
6f

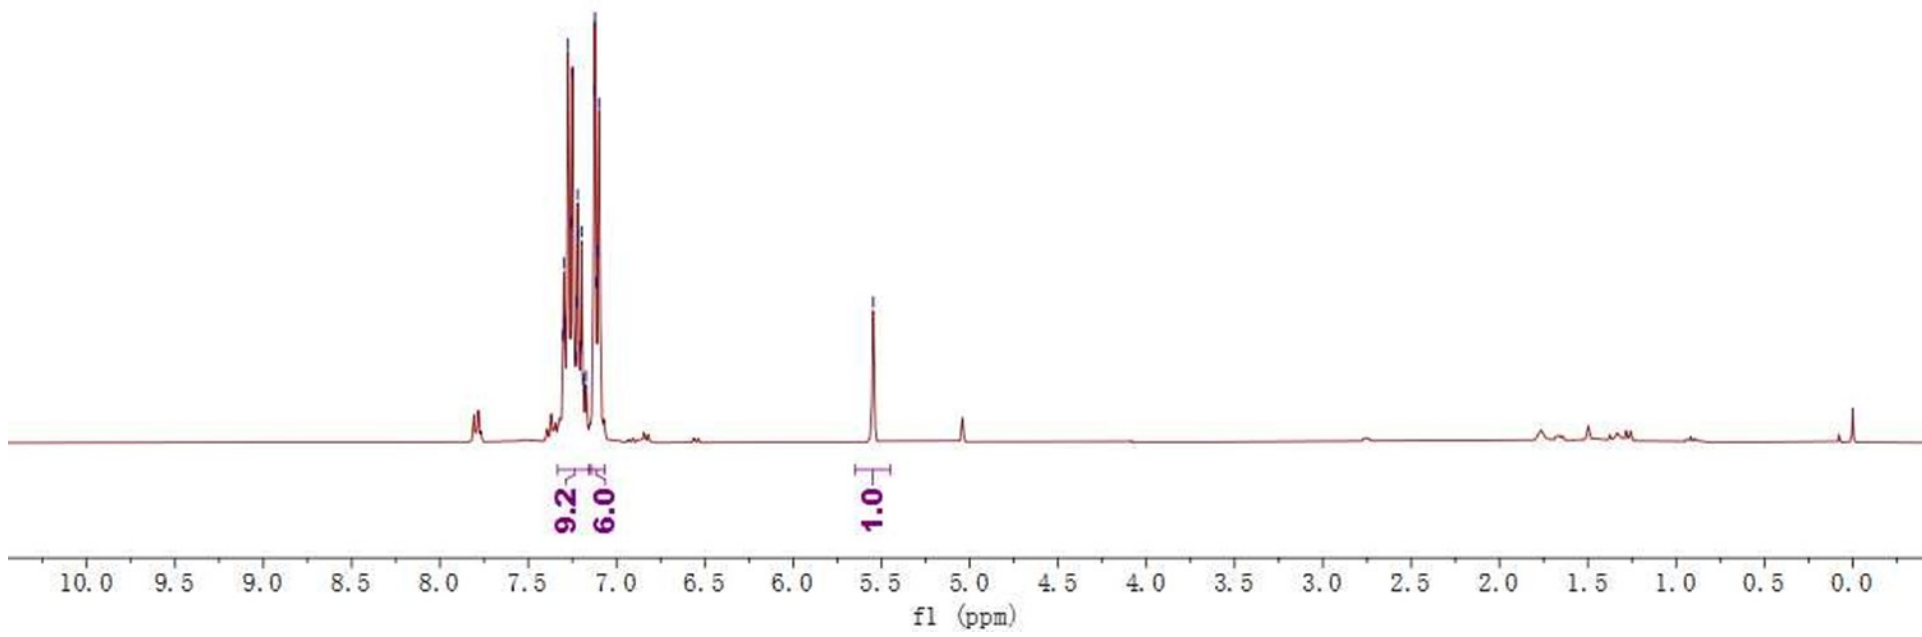

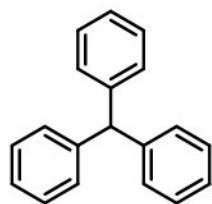

<sup>13</sup>C NMR  
**6f**

—143.7

—129.3

—128.1

—126.1

—56.7

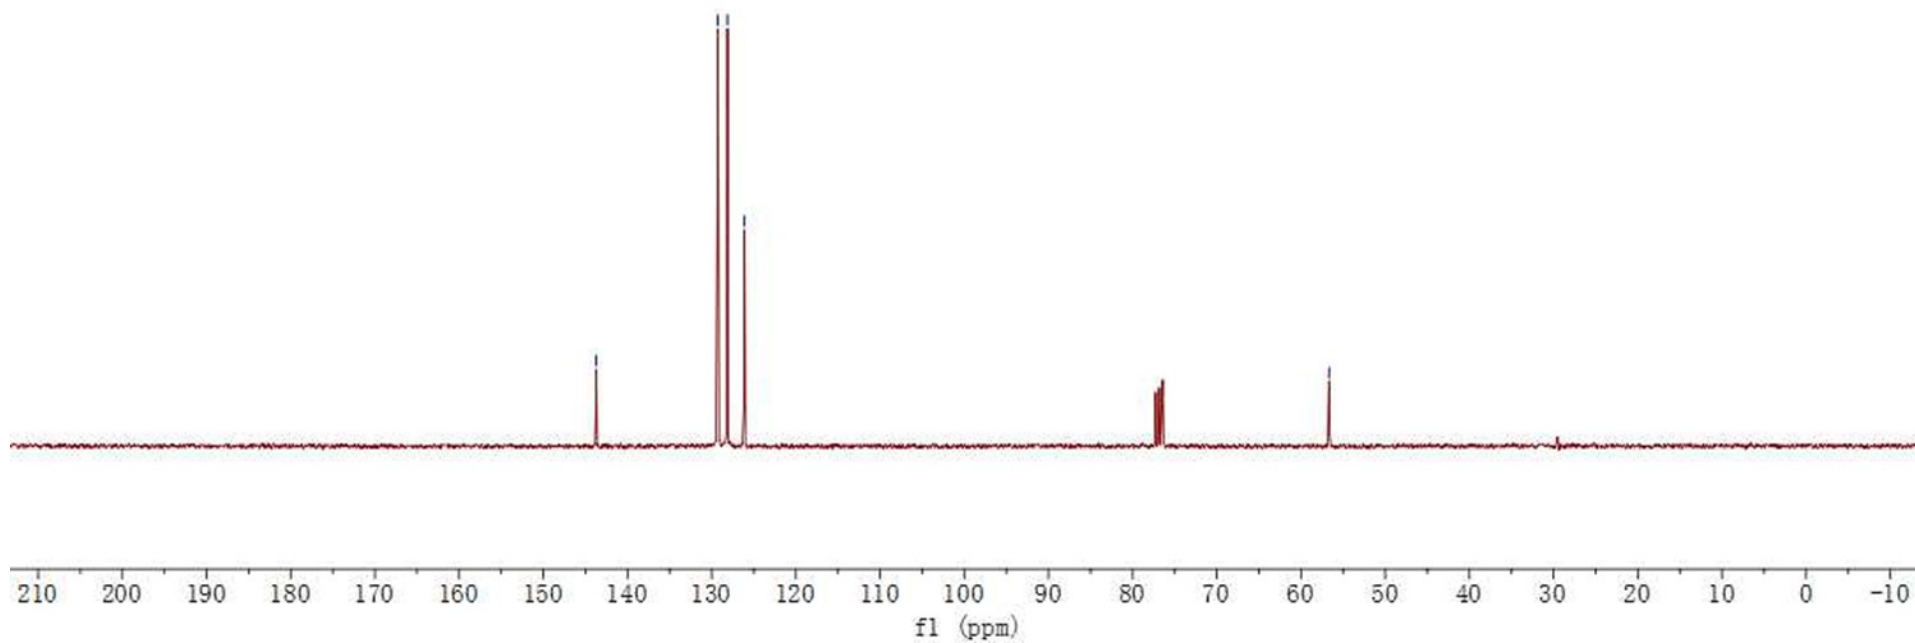

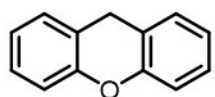

<sup>1</sup>H NMR  
6g

7.24  
7.24  
7.24  
7.23  
7.22  
7.22  
7.22  
7.21  
7.21  
7.20  
7.19  
7.19  
7.19  
7.09  
7.08  
7.07  
7.07  
7.06  
7.06  
7.05  
7.05

4.08

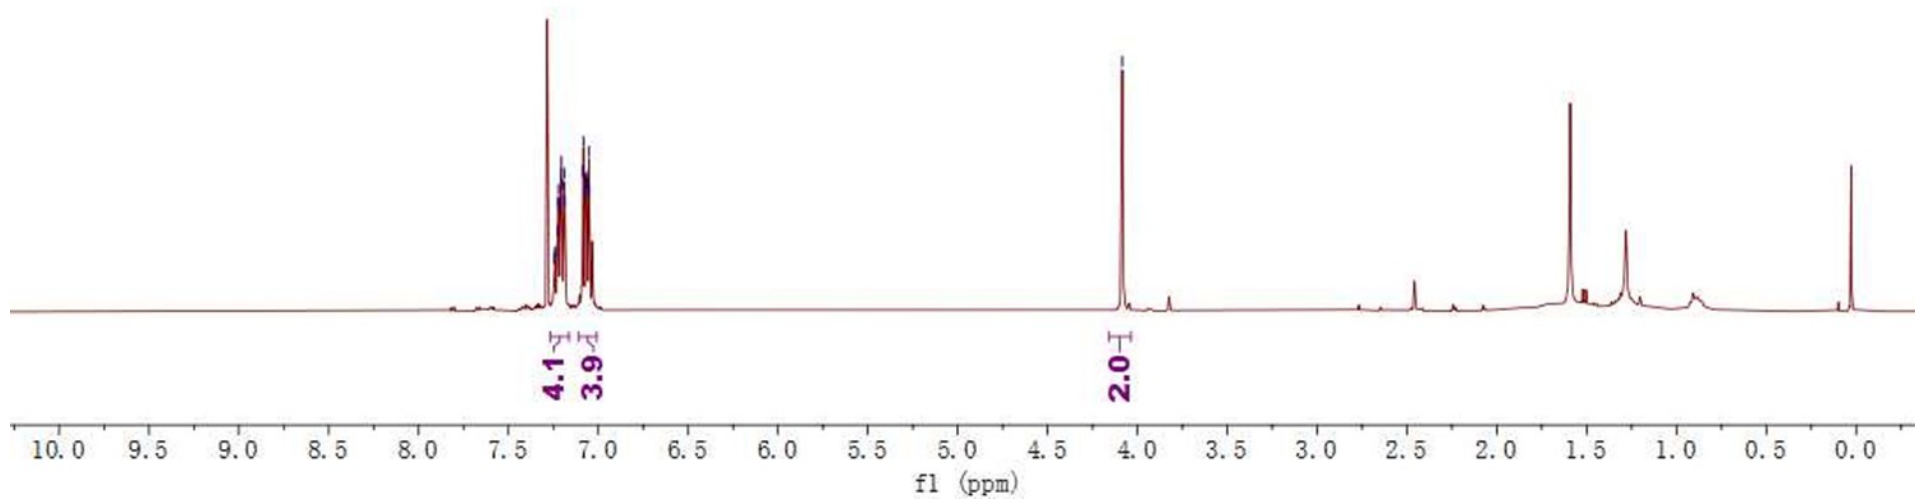

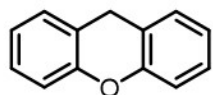

<sup>13</sup>C NMR

**6g**

128.9  
127.6  
123.0  
116.5

-27.9

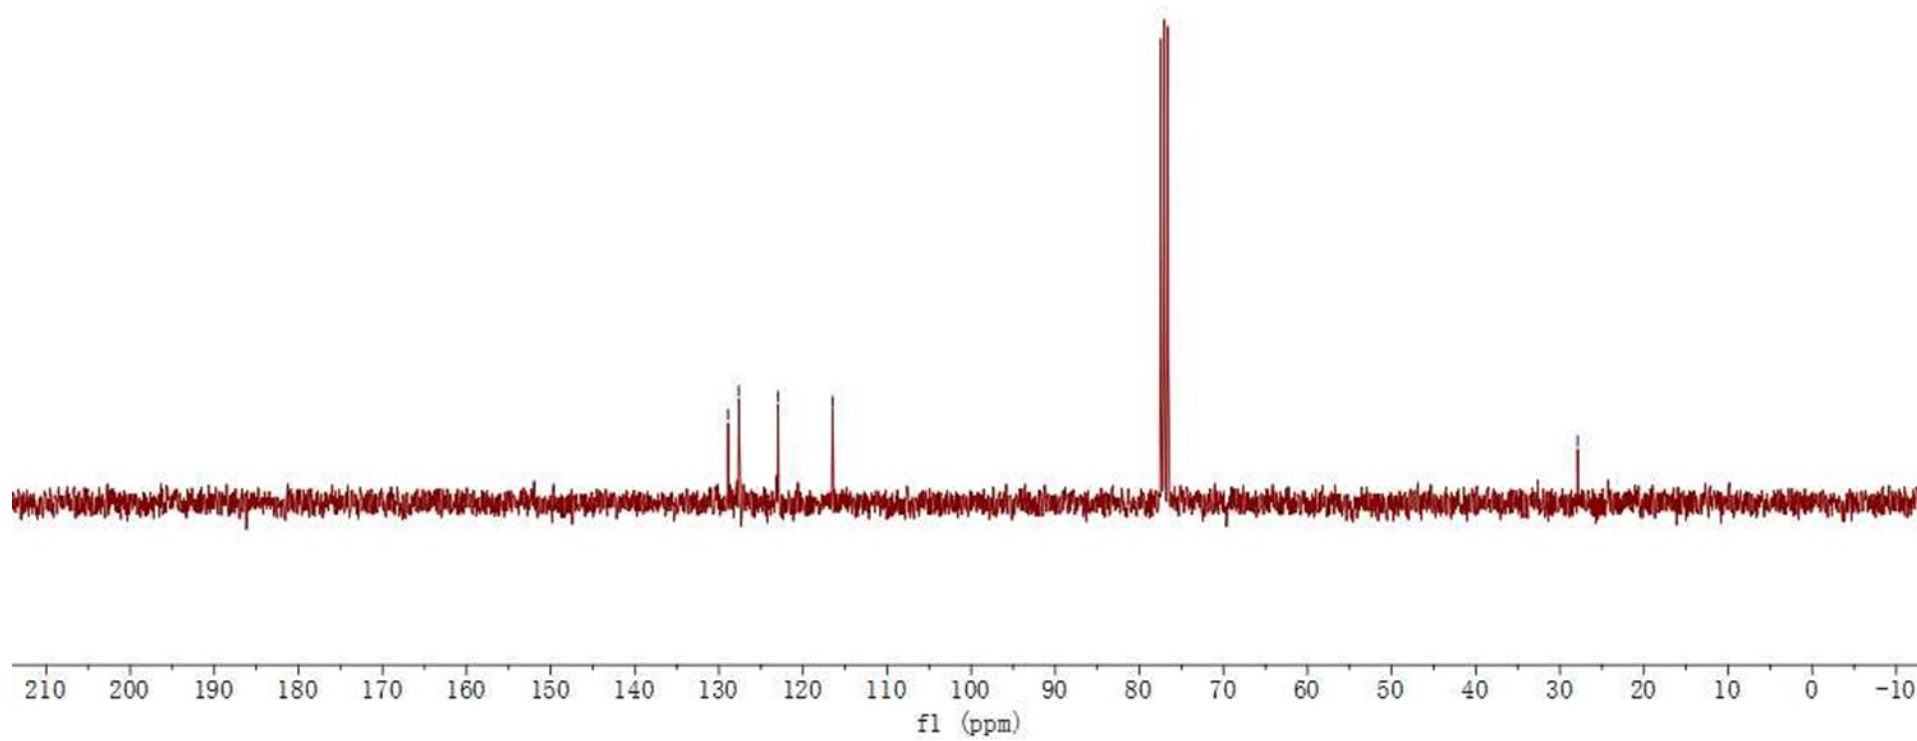

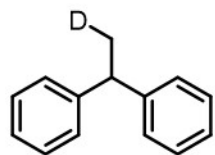

<sup>1</sup>H NMR  
7a

7.29  
7.27  
7.26  
7.23  
7.22  
7.21  
7.19  
7.19  
7.18  
7.17  
7.17  
7.16  
7.16  
7.15  
7.15

4.18  
4.16  
4.14  
4.13

1.65  
1.63  
1.63  
1.61  
1.61

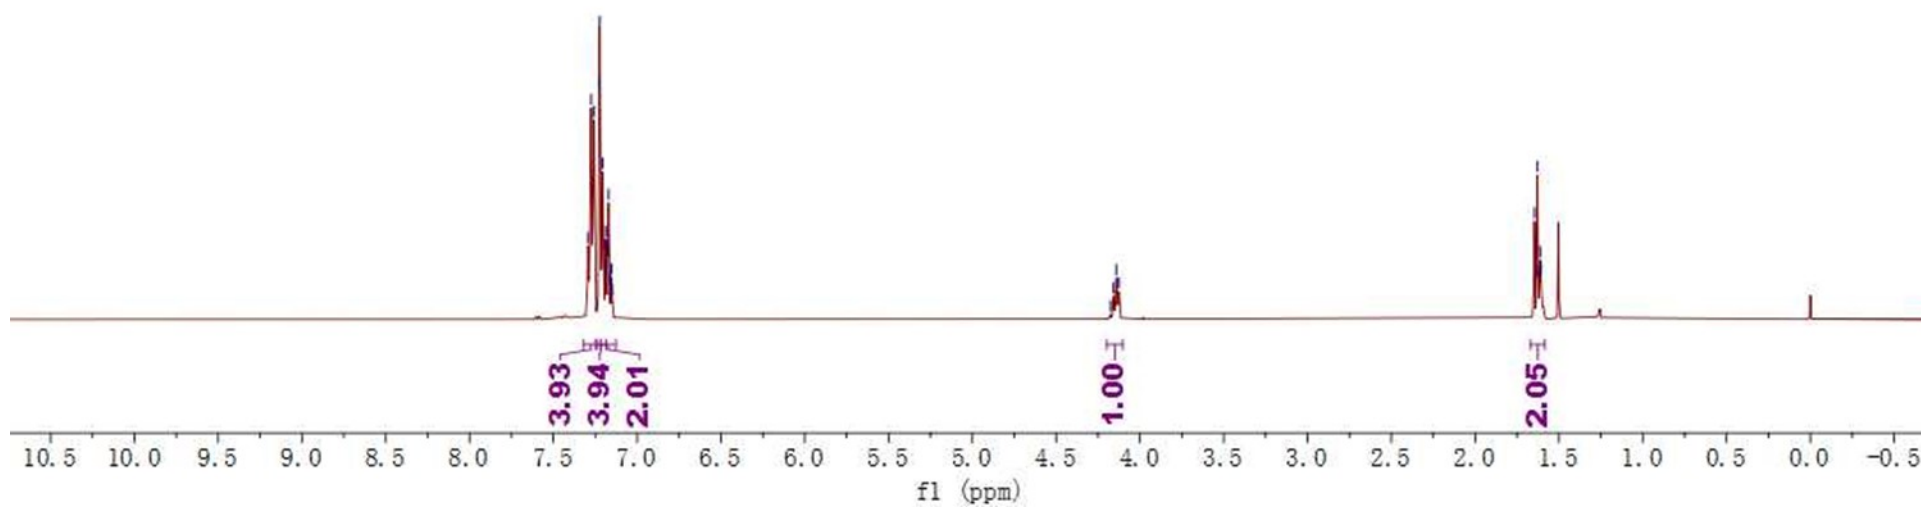

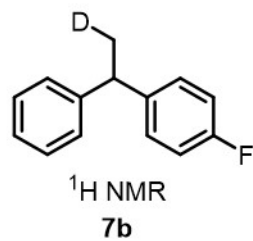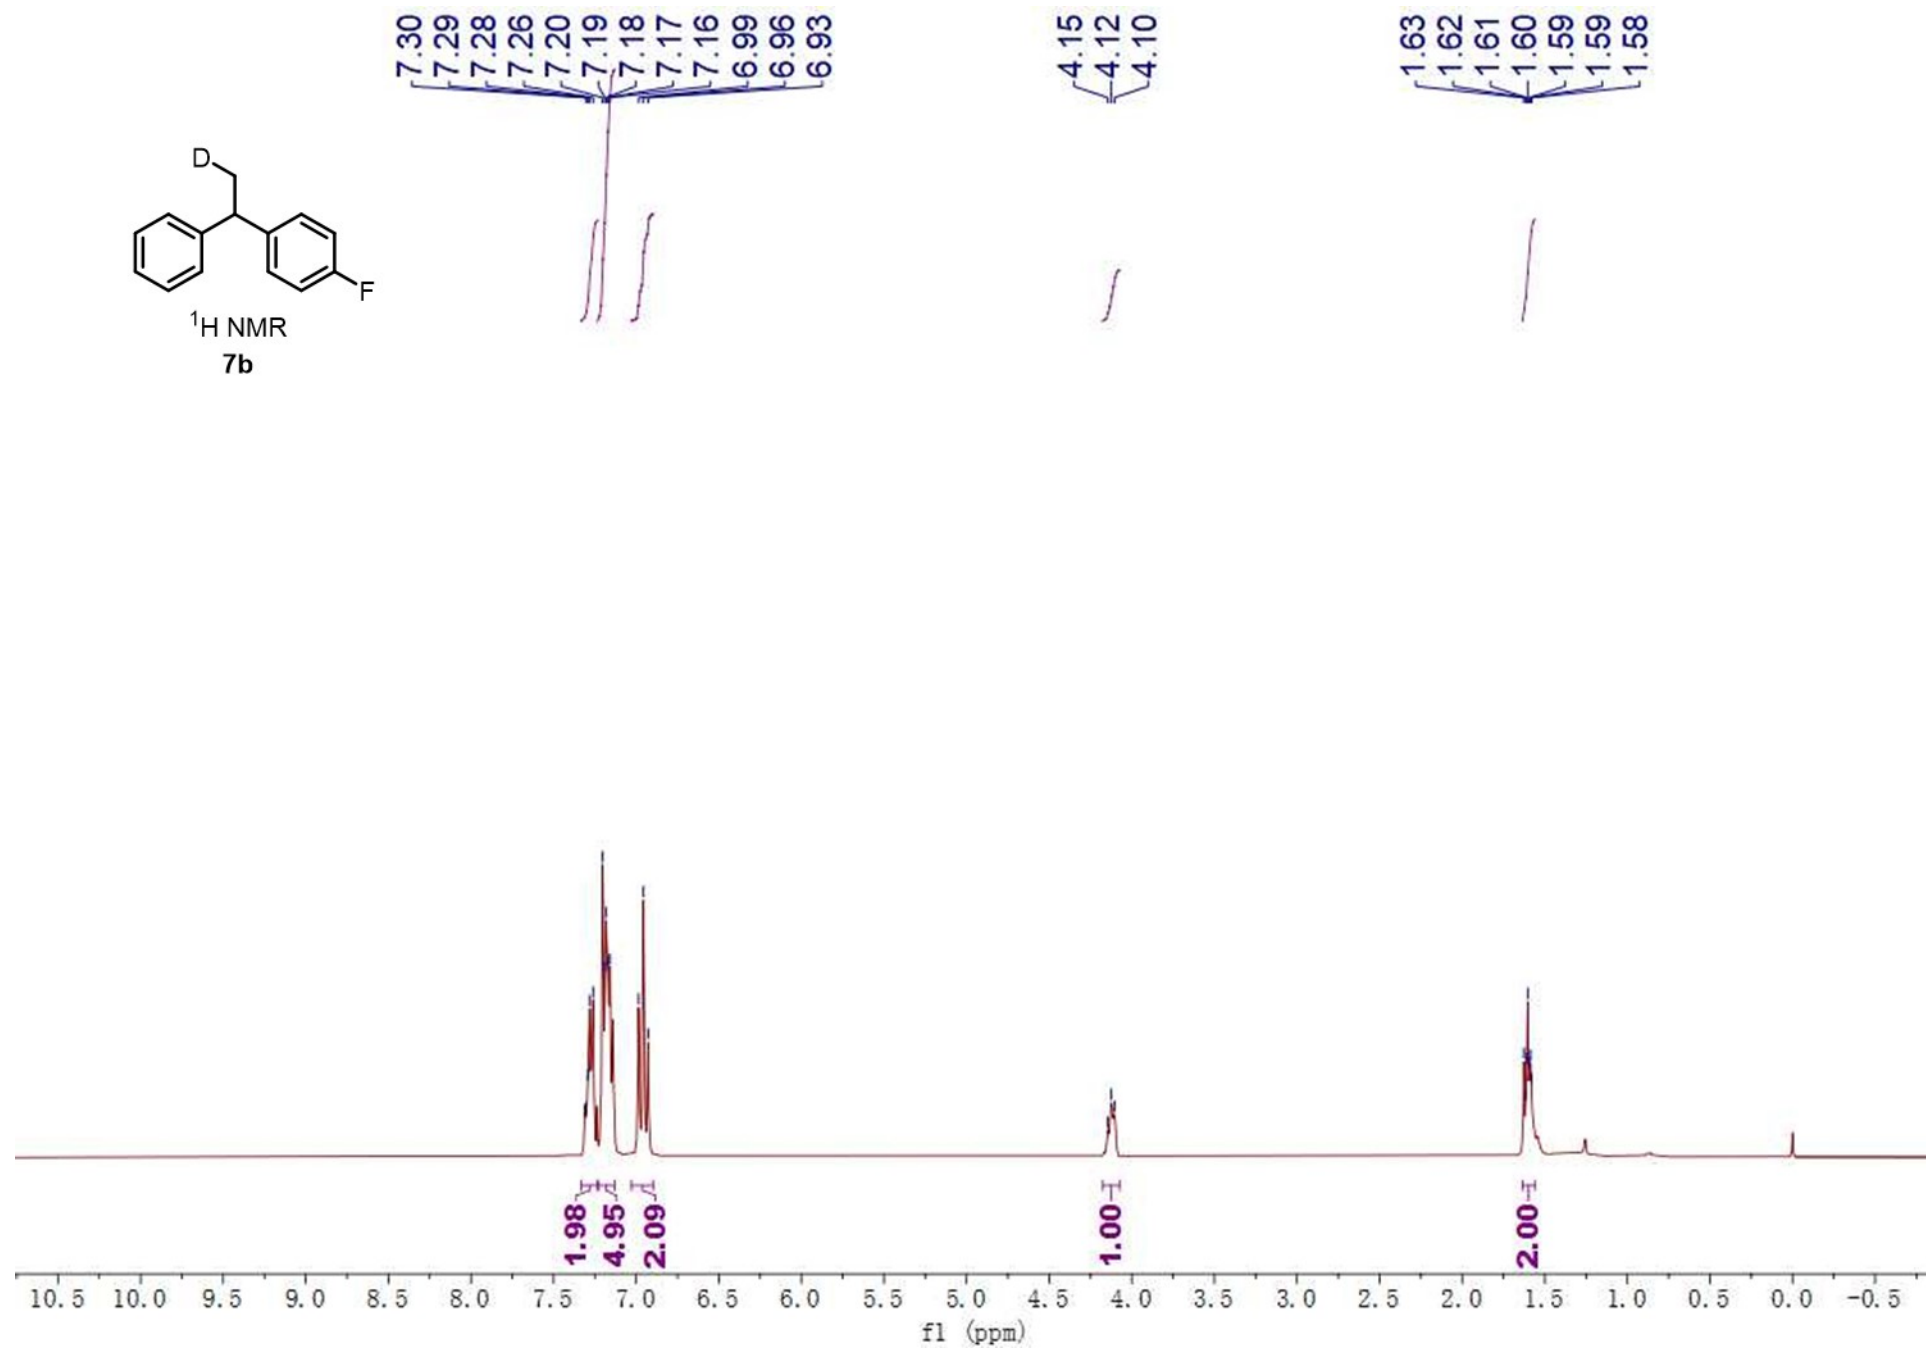



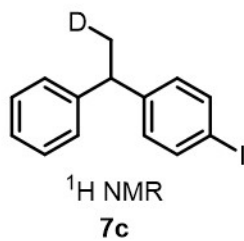

7.60  
 7.57  
 7.30  
 7.28  
 7.25  
 7.23  
 7.20  
 7.19  
 7.18  
 7.17  
 7.16  
 6.97  
 6.94

4.14  
 4.12  
 4.10  
 4.08  
 4.06

1.65  
 1.62  
 1.61  
 1.59  
 1.57  
 1.55

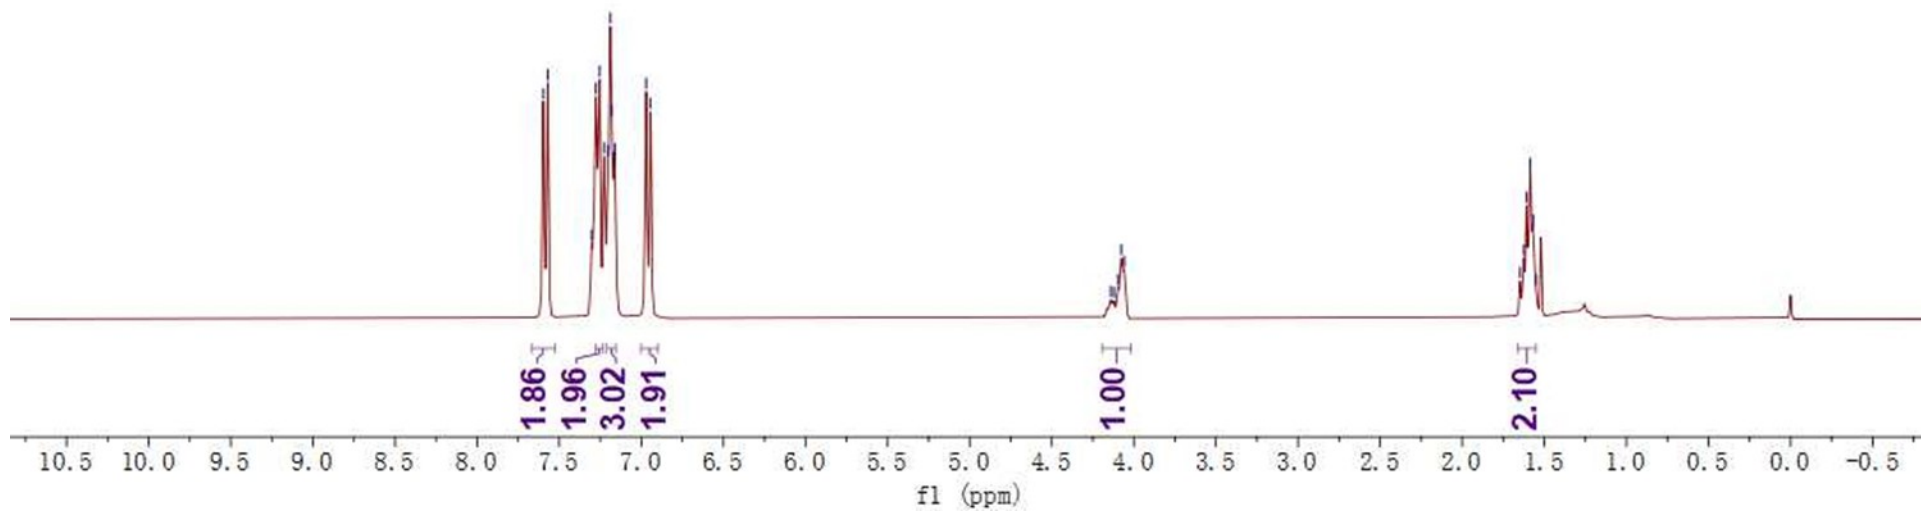

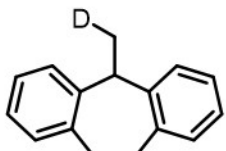

<sup>1</sup>H NMR  
7d

7.18  
7.17  
7.16  
7.15  
7.08  
7.08  
7.07  
7.06  
7.05  
7.05  
7.05  
7.04  
7.04  
7.03

4.37  
4.36  
4.35

3.15

1.67  
1.65  
1.65  
1.64  
1.63

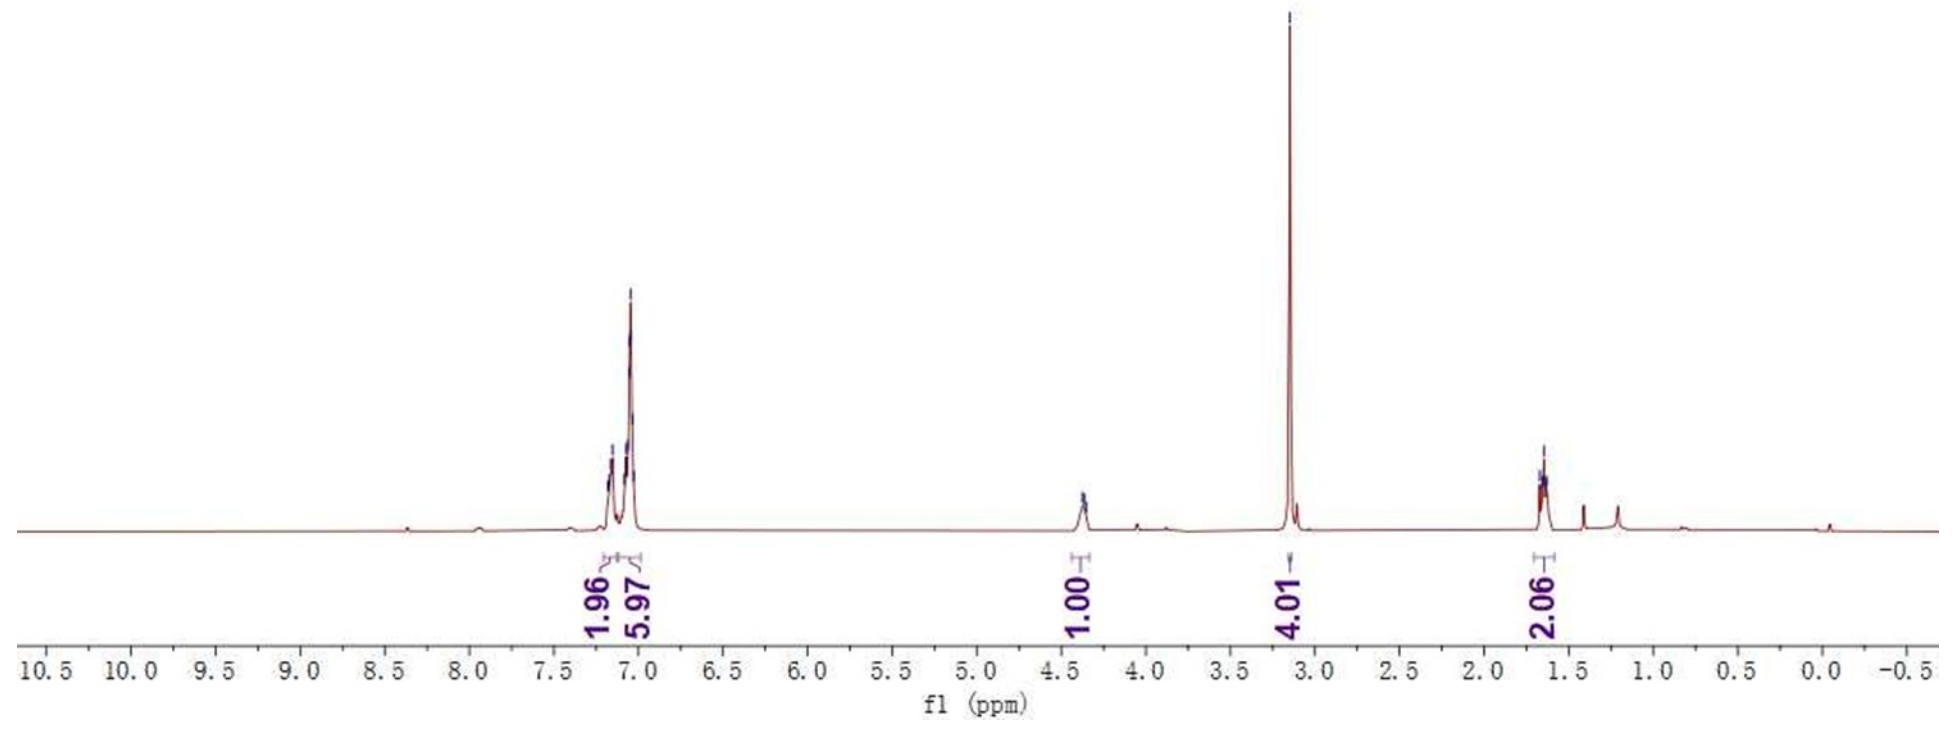

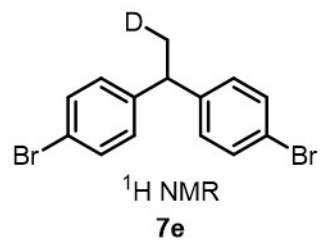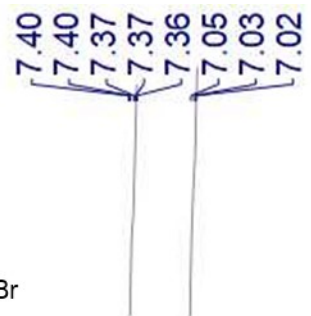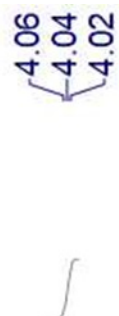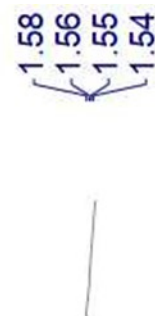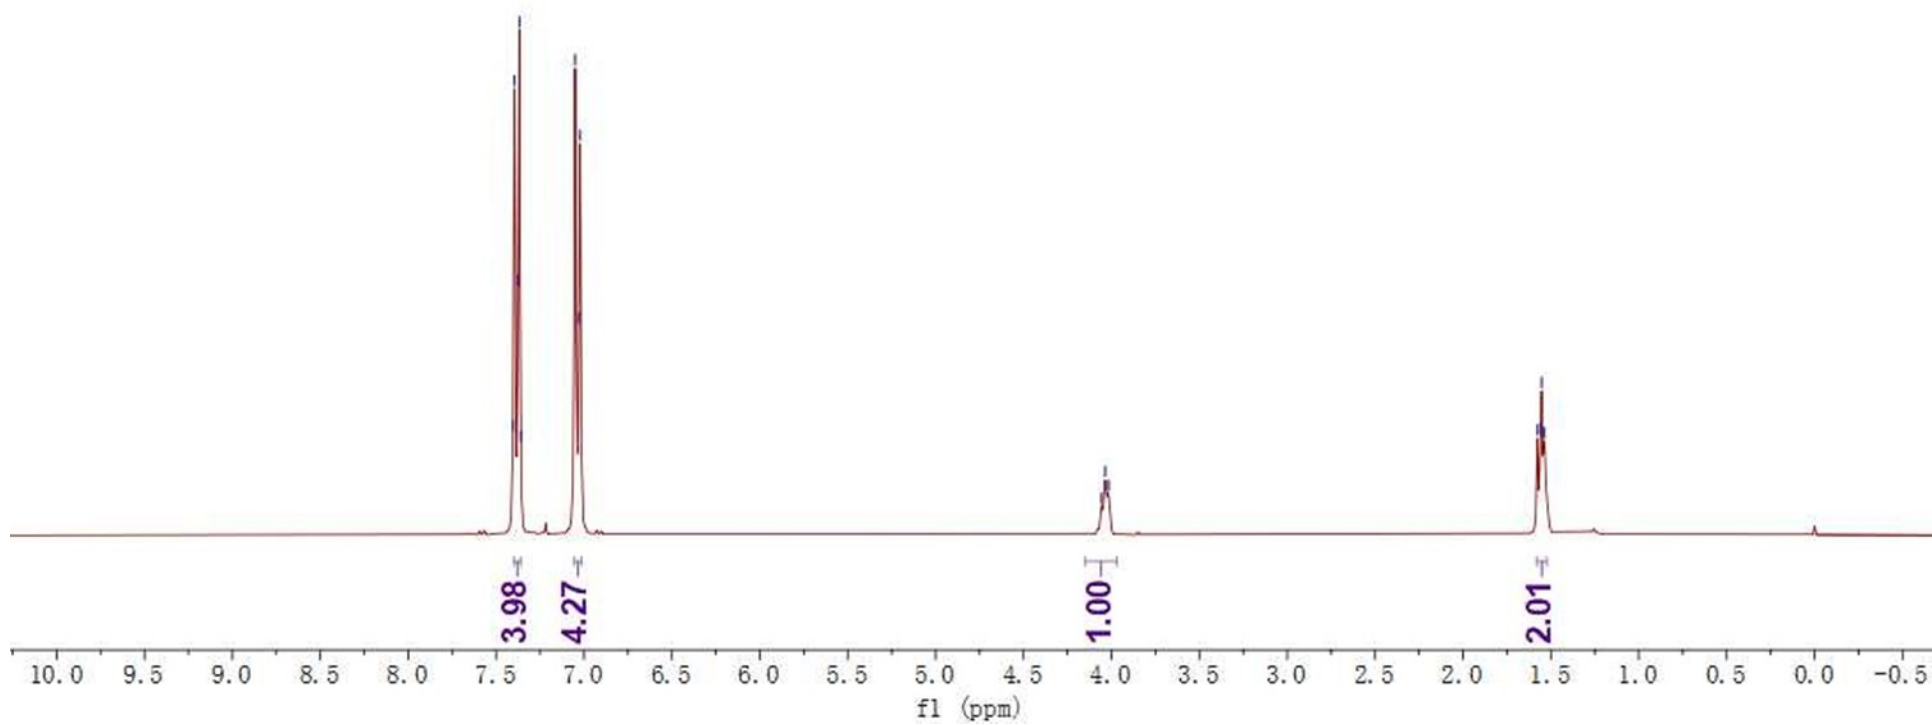

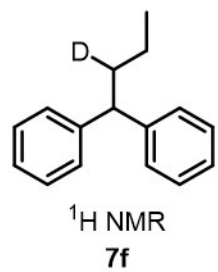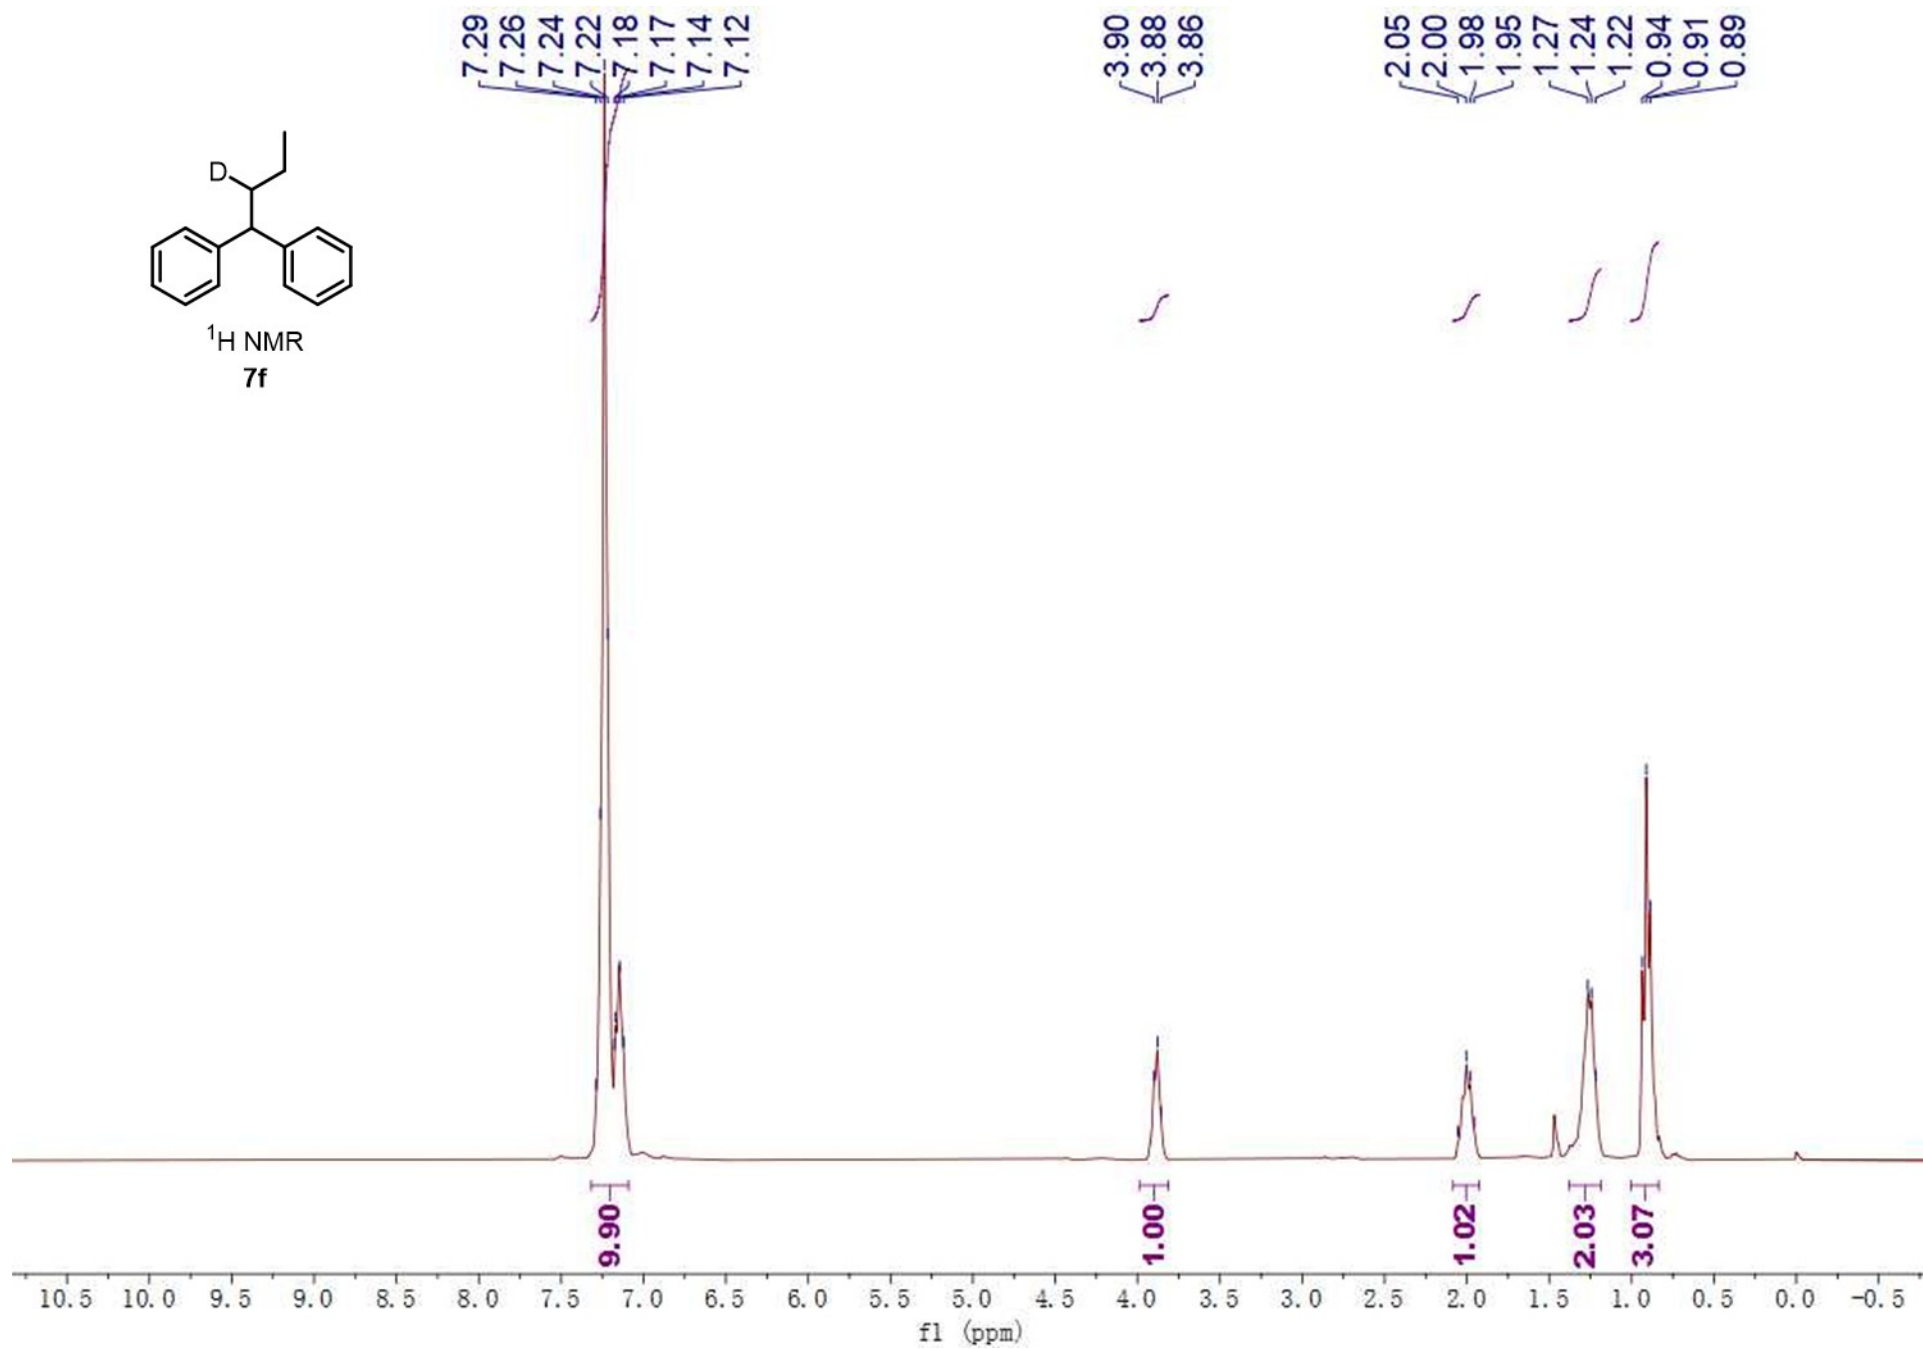

Supplement: d3cc03409g1.pdf [file d3cc03409g1.pdf]
